# Supplementary material for: Micronutrient Supplementation and Fortification Interventions on Health and Development Outcomes among Children Under-Five in Low- and Middle-Income Countries: A Systematic Review and Meta-Analysis
Source: MDPI journal article supplement (doi:10.3390/nu12020289), 2020-01-21

## Appendix 1 – MEDLINE Search Strategy

### Population:

1. exp infant/ or exp child/ or exp newborn/ or exp child,preschool/ or exp pediatrics/ or (infant\* or neonat\* or baby\* or babies or child\*or newborn\* or "newborn infant\*" or girl\* or boy\* or toddler\* or preschool\* or "pre school\*" or pre-school\* or "preschool child\*" or kindergarten\* or kindergarden\* or "nursery school" or "day care\*" NOT adult\* or paediatric\* or pediatric\* or under-five\* or "under five\*" or "under 5" or under-5 or "5 and under" or "five and under" or "under the age of five" or "under the age of 5").tw,kf

### Single or Multiple Micronutrient Supplementation:

2. Micronutrients/ or vitamins/ or minerals/ or exp iron/ or exp iron compounds/ or iron, dietary/ or vitamin A/ or exp iodine/ or exp zinc or exp zinc compounds/ or exp vitamin D/ or (micronutrient\* or multivitamin\* or multi-nutrient\* or "multi\*nutrient" or "multimicro-nutrient\*" or "multimicronutrient\*" or multivitamin\* or "multi-vitamin\*" or multimicronutrient\* or "multi-mineral\*" or MMN or "multiple micro nutrient\*" or "multiple micronutrient" or micro-nutrient\* or "essential vitamins\*" or minerals\* or "vitamin d" or "hydroxyvitamin d" or vitamin-d or "25 hydroxyvitamin d" or "25 hydroxy-vitamin d" or "25-hydroxyvitamin d" or "25-hydroxy-vitamin d" or "25-hydroxyvitamin d" or 25ohd or "25-oh-vitamin d" or 25-ohd or "vitamin d2" or vitamin-d2 or "25-hydroxyvitamin d2" or "25-hydroxy-vitamin d2" or "vitamin d3" or vitamin-d3 or "25 hydroxyvitamin d3" or "25 hydroxyvitamin d3" or "25-hydroxy-vitamin d3" or calcidiol or calcifediol or "vitamin a" or "vitamin a1" or retinol\* or retinal\* or Retinaldehyde or retinoid or Retinoids or retinoic or beta-carotene or "beta carotene" or iron or ferr\* compounds or "dietary iron" or zinc or "zn" or "zinc acetate" or "zn acetate" or "zn sulfate" or "zn oxide" or iodine or "iod\* compounds" or "ferr\* compounds" or "dietary iron").tw,kf

3. Dietary supplements/ or tablets/ or ((supplement\* or nutraceutical\* or nutraceutical\* or nutraceutical\* or tablet\* or syrup\* or drop\*).tw,kf)

4. 1 AND 2 AND 3

### Lipid-Nutrient Supplementation:

5. exp Lipids/ or omega-3/ or (lipid\* or soy\* or peanut\* or whey\* or sesame\* or cashew\* or chickpea\* or oils or protein\* or butter\* or fat\* or "alpha-linolenic acid" or "docosahexaenoic acids" or "eicosapentaenoic acid").tw,kf

6. Dietary supplements/ or (("lipid based" or "lipid-based nutri\*" or enrich\* or emuls\* or powder\* or spread\* or paste\* or LNS\*1 or iLiNS or supplement\* or nutraceutical\* or nutraceutical\* or Nutraceutical\* or Plumpy\* or PlumpyNut or "ready to use" or "ready-to-use therapeutic food" or RUSF or RUTF).tw,kf)

7. 1 AND 5 AND 6

#### Large-Scale Fortification:

8. exp Food/ or "Food Supply"/ or exp "Agricultural Crops"/ or exp Salts/ or exp "Fish Products"/ or exp "Soy Foods" or exp Cereals/ or exp "Dietary Carbohydrates"/ or exp Oryza/ or exp Milk/ or exp Bread/ or exp Beverages/ or exp Yogurt/ or exp Margarine/ or exp Cheese/ or exp "Zea mays"/ or exp Condiments/ or exp Triticum/ or exp Spices/ or exp "Dietary Fats"/ or exp "Dairy Products"/ or (Food\* or "staple foods" or crop\* or flour\* or salt\* or sauce\* or cereal\* or sugar\* or rice\* or milk\* or bread\* or oil\* or beverage\* or yogurt\* or margarine\* or cheese\* or maize\* or corn\* or wheat\* or "durum wheat\*" or "sorghum vulgare" or sorghum or condiment\* or spices\* or "curry powder\*" or fat\* or dairy\*).tw,kf

9. Micronutrients/ or vitamins/ or minerals/ or exp iron/ or exp iron compounds/ or iron, dietary/ or vitamin A/ or exp iodine/ or exp zinc/ or exp zinc compounds/ or exp vitamin D/ or exp folic acid/ or (micronutrient\* or multivitamin\* or multi-nutrient\* or "multi\*nutrient" or "multimicro-nutrient\*" or "multimicronutrient\*" or multivitamin\* or "multi-vitamin\*" or multimineral\* or "multi-mineral\*" or MMN or "multiple micro nutrient\*" or "multiple micronutrient" or micro-nutrient\* or "essential vitamins\*" or minerals\* or "vitamin d" or "hydroxyvitamin d" or vitamin-d or "25 hydroxyvitamin d" or "25 hydroxy-vitamin d" or "25-hydroxyvitamin d" or "25-hydroxy-vitamin d" or "25-hydroxyvitamin d" or 25ohd or "25-oh-vitamin d" or 25-ohd or "vitamin d2" or vitamin-d2 or "25-hydroxyvitamin d2" or "25 hydroxy-vitamin d2" or "vitamin d3" or vitamind3 or "25 hydroxyvitamin d3" or "25 hydroxyvitamin d3" or "25-hydroxy-vitamin d3" or calcidiol or calcifediol or "vitamin a" or "vitamin a1" or retinol\* or retinal\* or Retinaldehyde or retinoid or Retinoids or retinoic or beta-carotene or "beta carotene" or iron or ferr\* compounds or "dietary iron" or zinc or "zn" or "zinc acetate" or "zn acetate" or "zn sulfate" or "zn oxide" or iodine or "iod\* compounds" or "ferr\* compounds" or "dietary iron" or "folic acid" or folate\*).tw,kf.

10. ("supplemented food\*" or "large scale fortif\*" or enrich\* or fortif\*).tw,kf.

11. 1 AND 8 AND 9 AND 10

#### Targeted Fortification for Infants and Young Children:

12. exp "infant food"/ or milk substitutes/ or infant formula/ or soy milk/ or ("baby formula" or "artificial milk" or "complementary food\*" or "blended food\*" or "infant cereal" or "baby food\*" or milk\* or cereal\* or porridge\* or paste\*).tw,kf

13. ("targeted fortification" or enrich\* or fortif\* or "supplemented food\*").tw,kf

14. 1 AND 12 AND 13

#### Point-Of-Use Fortification with Micronutrient Powders:

15. Powders/ or vitamins/ or minerals/ or micronutrients/ or ("sprinkles powder" or Sprinkle\* or powder\* or foodlet\* or "foodlet-based" or "crushable nutritabs" or "micronutrient powder" or "multiple micronutrient powder" or mnp).tw,kf

16. ("Point-of-use" or "home fortification" or "food fortif\*" or enrich\* or fortif\*).tw,kf

17. 1 AND 15 AND 16

18. Developing Countries/ or ("developing country" or "developing countries" or "developing nation" or "developing nations" or "developing population" or "developing populations" or "developing world" or "less developed country" or "less developed countries" or "less developed nation" or "less developed nations" or "less developed population" or "less developed populations" or "less developed world" or "lesser developed country" or "lesser developed countries" or "lesser developed nation" or "lesser developed nations" or "lesser developed population" or "lesser developed populations" or "lesser developed world" or "under developed country" or "under developed countries" or "under developed nation" or "under developed nations" or "under developed population" or "under developed populations" or "under developed world" or "underdeveloped country" or "underdeveloped countries" or "underdeveloped nation" or "underdeveloped nations" or "underdeveloped population" or "underdeveloped populations" or "underdeveloped world" or "middle income country" or "middle income countries" or "middle income nation" or "middle income nations" or "middle income population" or "middle income populations" or "low income country" or "low income countries" or "low income nation" or "low income nations" or "low income population" or "low income populations" or "lower income country" or "lower income countries" or "lower income nation" or "lower income nations" or "lower income population" or "lower income populations" or "underserved country" or "underserved countries" or "underserved nation" or "underserved nations" or "underserved population" or "underserved populations" or "underserved world" or "under served country" or "under served countries" or "under served nation" or "under served nations" or "under served population" or "under served populations" or "under served world" or "deprived country" or "deprived countries" or "deprived nation" or "deprived nations" or "deprived population" or "deprived populations" or "deprived world" or "poor country" or "poor countries" or "poor nation" or "poor nations" or "poor population" or "poor populations" or "poor world" or "poorer country" or "poorer countries" or "poorer nation" or "poorer nations" or "poorer population" or "poorer populations" or "poorer world" or "developing economy" or "developing economies" or "less developed economy" or "less developed economies" or "lesser developed economy" or "lesser developed economies" or "under developed economy" or "under developed economies" or "underdeveloped economy" or "underdeveloped economies" or "middle income economy" or "middle income economies" or "low income economy" or "low income economies" or "lower income economy" or "lower income economies" or "low gdp" or "low gnp" or "low gross domestic" or "low gross national" or "lower gdp" or "lower gnp" or "lower gross domestic" or "lower gross national" or lmic or lmics or "third world" or "lami country" or "lami countries" or "transitional country" or "transitional countries" or Africa or Asia or "Caribbean Region" or

"West Indies" or "South America" or "Latin America" or "Central America" or Afghanistan or Albania or Algeria or Angola or Argentina or Armenia or Armenian or Azerbaijan or Bangladesh or Benin or Byelarus or Byelorussian or Belarus or Belorussian or Belorussia or Belize or Bhutan or Bolivia or Bosnia or Herzegovina or Hercegovina or Botswana or Brazil or Bulgaria or "Burkina Faso" or "Burkina Fasso" or Burundi or Urundi or Cambodia or "Khmer Republic" or Kampuchea or Cameroon or Cameroons or Cameron or Camerons or "Cape Verde" or "Central African Republic" or Chad or China or Colombia or Comoros or "Comoro Islands" or Comores or Mayotte or Congo or Zaire or "Costa Rica" or "Cote d'Ivoire" or "Ivory Coast" or Cuba or Djibouti or "French Somaliland" or Dominica or "Dominican Republic" or "East Timor" or "East Timur" or "Timor Leste" or Ecuador or Egypt or "El Salvador" or Eritrea or Ethiopia or Fiji or Gabon or "Gabonese Republic" or Gambia or Gaza or "Georgia Republic" or "Georgian Republic" or Ghana or "Gold Coast" or Grenada or Guatemala or Guinea or Guiana or Guyana or Haiti or Honduras or India or Maldives or Indonesia or Iran or Iraq or "Isle of Man" or Jamaica or Jordan or Kazakhstan or Kazakh or Kenya or Kiribati or Korea or Kosovo or Kyrgyzstan or Kirghizia or "Kyrgyz Republic" or Kirghiz or Kirgizstan or "Lao PDR" or Laos or Lebanon or Lesotho or Basutoland or Liberia or Libya or Macedonia or Madagascar or "Malagasy Republic" or Malaysia or Malaya or Malay or Sabah or Sarawak or Malawi or Nyasaland or Mali or "Marshall Islands" or Mauritania or Mauritius or Mexico or Micronesia or "Middle East" or Moldova or Moldovia or Moldovian or Mongolia or Montenegro or Morocco or Mozambique or Myanmar or Myanma or Burma or Namibia or Nepal or Nicaragua or Niger or Nigeria or Pakistan or Palau or Palestine or Panama or Paraguay or Peru or Philippines or Philipines or Phillipines or Phillippines or Romania or Rumania or Roumania or Russia or Russian or Rwanda or Ruanda or "Saint Lucia" or "St Lucia" or "Saint Vincent" or "St Vincent" or Grenadines or Samoa or "Samoan Islands" or "Navigator Island" or "Navigator Islands" or "Sao Tome" or Senegal or Serbia or Montenegro or Seychelles or "Sierra Leone" or "Sri Lanka" or Ceylon or "Solomon Islands" or Somalia or Sudan or Suriname or Surinam or Swaziland or Syria or Tajikistan or Tadjhikistan or Tadjikistan or Tadzhih or Tanzania or Thailand or Togo or "Togolese Republic" or Tonga or Tunisia or Turkey or Turkmenistan or Turkmen or Uganda or Ukraine or USSR or "Soviet Union" or "Union of Soviet Socialist Republics" or Uzbekistan or Uzbek or Vanuatu or Venezuela or Vietnam or "Viet Nam" or "West Bank" or Yemen or Yugoslavia or Zambia or Zimbabwe or Rhodesia).tw,kf

19. 4 OR 7 OR 11 OR 14 OR 17

20. 19 AND 18

21. Limit 20 to yr="1995-2017"

## Appendix 2 – Eligible Studies Excluded from Meta-Analyses

| First author, year                                   | Study design       | Country | Age range enrolled | Total study population            | Intervention                                     | Intervention dose and formulation                                                                                                                                                                                                                                                                                                        | Intervention duration and frequency                            | Control                            | Control dose and formulation                                                                                                                                                                                      |
|------------------------------------------------------|--------------------|---------|--------------------|-----------------------------------|--------------------------------------------------|------------------------------------------------------------------------------------------------------------------------------------------------------------------------------------------------------------------------------------------------------------------------------------------------------------------------------------------|----------------------------------------------------------------|------------------------------------|-------------------------------------------------------------------------------------------------------------------------------------------------------------------------------------------------------------------|
| <b>Abdelrazik, 2007</b>                              | Non-RCT            | Egypt   | 4-6 months         | 248                               | MMN (with iron) supplementation                  | 5mL of syrup: vitamin A (1200IU), vitamin D3 (100IU), thiamin (1mg), riboflavin (1mg), pyridoxine (0.5mg), vitamin C (50mg), vitamin E (1mg), nicotinamide (5mg), panthenol (2mg), calcium gluconate and phosphate (50mg), ferrous gluconate (43mg eq to elemental iron 5mg), 1 mg/kg iron - adjusted monthly according to infant weight | Daily for 12 months                                            | MMN (without iron) supplementation | 5ml of syrup: vitamin A (1200IU), D3 (100IU), thiamin (1mg), riboflavin (1mg), pyridoxine (0.5mg), vitamin C (50mg), vitamin E (1mg), nicotinamide (5mg), panthenol (2mg), calcium gluconate and phosphate (50mg) |
| <b>Abdollahi, 2014</b>                               | cRCT               | Iran    | 6-24 months        | 838 (17 clusters)                 | Zinc supplementation                             | 5 mL of syrup: zinc (5mg)                                                                                                                                                                                                                                                                                                                | Daily for 3 months                                             | No intervention                    |                                                                                                                                                                                                                   |
| <b>Aburto, 2010</b>                                  | cRCT               | Mexico  | 4-12 months        | 187                               | MNP, MMN supplementation or fortified food group | MNP and MMN (syrup): iron (10mg), zinc (10mg), vitamin A (400mcg), vitamin E (6mg), vitamin C (50mg), vit B2 (0.8mg), vitamin B12 (0.7mcg), folic acid (50mcg)<br>Fortified food: also contained energy (194kcal), protein (5.8g), fat (6.6g), carbohydrate (27.9g), sodium (24.5mg).                                                    | Daily for 4 months                                             | No intervention                    |                                                                                                                                                                                                                   |
| <b>Acharya, 2018</b>                                 | Natural experiment | Nepal   | 6-60 months        |                                   | Vitamin A supplementation                        | High-dose capsule                                                                                                                                                                                                                                                                                                                        | Bi-annually                                                    | No intervention                    |                                                                                                                                                                                                                   |
| <b>Adom, 2010</b>                                    | RCT                | Ghana   | 6-18 months        | 56                                | Iron fortified maize-cowpea flour                | 184mg/kg dry weight                                                                                                                                                                                                                                                                                                                      | Daily (3 times a day) for 6 months                             | Unfortified maize-cowpea flour     |                                                                                                                                                                                                                   |
| <b>Akrour-Aissou, 2019</b>                           | Non-RCT            | Algeria | 1-23 months        | 150                               | Vitamin D supplementation                        | Syrup: 200 000 IU at 1 month of age and 200 000 IU at 6 months of age                                                                                                                                                                                                                                                                    | 2 doses (one at 1 month of age and another at 6 months of age) | No intervention                    |                                                                                                                                                                                                                   |
| <b>Alderman, 2009</b><br><br><b>Associated refs:</b> | cRCT               | Senegal | 6-59 months        | 200,000 households (220 clusters) | Vitamin A supplementation                        | Syrup: children 6-11 months of age received 100,000IU and children 12-59 months of age received 200,000IU                                                                                                                                                                                                                                | Bi-annually for 2 years                                        | No intervention                    |                                                                                                                                                                                                                   |

|                           |         |                              |              |      |                                               |                                                                                                                                                                                                                                                                                                                                                                                              |                             |                                    |                                                                                                                                                                                                                                                                                                                                    |
|---------------------------|---------|------------------------------|--------------|------|-----------------------------------------------|----------------------------------------------------------------------------------------------------------------------------------------------------------------------------------------------------------------------------------------------------------------------------------------------------------------------------------------------------------------------------------------------|-----------------------------|------------------------------------|------------------------------------------------------------------------------------------------------------------------------------------------------------------------------------------------------------------------------------------------------------------------------------------------------------------------------------|
| <b>Linnemayr, 2011</b>    |         |                              |              |      |                                               |                                                                                                                                                                                                                                                                                                                                                                                              |                             |                                    |                                                                                                                                                                                                                                                                                                                                    |
| <b>Almeida, 2014</b>      | cRCT    | Brazil                       | 12-59 months | 184  | MNP (with iron only) fortified drinking water | 10mg of iron and 100mg of ascorbic acid per liter water (the pre-mix contained 1000 mg of FeSO4-7H2O and 2000 mg of ascorbic acid diluted in 20 ml of water)                                                                                                                                                                                                                                 | Daily for 3 months          | Unfortified drinking water         |                                                                                                                                                                                                                                                                                                                                    |
| <b>Asibey-Berko, 2007</b> | RCT     | Ghana                        | 1-5 years    | 157  | Iodine and iron fortified salt                | 1000ppm iron (1g/kg) and 50ppm (50mg/kg) iodine; average daily intake is 70mg/week                                                                                                                                                                                                                                                                                                           | Daily for 8 months          | No intervention                    |                                                                                                                                                                                                                                                                                                                                    |
| <b>Assis, 2000</b>        | Non-RCT | Brazil                       | 6-59 months  | 871  | Vitamin A supplementation                     | Children 6-12 months of age: vitamin A (100,000IU); children >1year of age: 200,000IU                                                                                                                                                                                                                                                                                                        | 1 dose                      | No intervention                    |                                                                                                                                                                                                                                                                                                                                    |
| <b>Baqui, 1995</b>        | RCT     | Bangladesh                   | 6-7 weeks    | 185  | Vitamin A supplementation                     | Liquid: 25,000IU                                                                                                                                                                                                                                                                                                                                                                             | 3 doses at DPT immunization | Placebo                            |                                                                                                                                                                                                                                                                                                                                    |
| <b>Barth-Jaeggi, 2015</b> | RCT     | Kenya                        | 6 months     | 379  | MNP (with iron only)                          | 1 sachet: vitamin A (100ug), iron (2.5mg), vitamin D (5ug), copper (0.34mg), tocopherol equivalent (5mg), iodine (30ug), vitamin K1 (30ug), selenium (17ug), thiamine (0.5mg), zinc (2.5mg), riboflavin (0.5mg), pyridoxine (0.5mg), folic acid anhydrous (90ug), niacinamide (6mg), vitamin B12 (0.9ug), vitamin C (60mg)                                                                   | Daily for 12 months         | MNP (without iron)                 | 1 sachet: vitamin A (100ug), vitamin D (5ug), copper (0.34mg), tocopherol equivalent (5mg), iodine (30ug), vitamin K1 (30ug), selenium (17ug), thiamine (0.5mg), zinc (2.5mg), riboflavin (0.5mg), pyridoxine (0.5mg), folic acid anhydrous (90ug), niacinamide (6mg), vitamin B12 (0.9ug), vitamin C (60mg)                       |
| <b>Bisimwa, 2012</b>      | RCT     | Democratic Republic of Congo | 4-5 months   | 1383 | LNS (RUCF)                                    | 50g: vitamin A (412IU), vitamin D (307IU), vitamin C (75mg), thiamine (0.7mg), riboflavin (1.0mg), vitamin B12 (1ug), pyridoxine (0.24mg), niacin (10.3mg), pantothenic acid (3.8mg), folic acid (0.07mg), vitamin K (0.01mg), calcium (514mg), phosphorus (265mg), iron (9.5mg), zinc (8.3mg), copper (0.3mg), iodine (0.07mg), selenium (0.003mg), magnesium (23.4mg), phytic acid (2.1mg) | Daily for 6 months          | MMN fortified corn soy blend flour | 70g: Vitamin A (537IU), vitamin D (140IU), vitamin C (42mg), thiamine (0.2mg), riboflavin (0.6mg), vitamin B12 (0.9ug), pyridoxine (0.11mg), niacin (3.5mg), pantothenic acid (2.0mg), folic acid (0.14mg), vitamin E (5.3IU), calcium (182mg), iron (5.6mg), zinc (8.4mg), copper (0.5mg), iodine (0.03mg), phytic acid (0.650mg) |

|                                                             |                               |            |              |                                                 |                                                                 |                                                                                                                                                                                                                                                                        |                                                                                                               |                                                                                                                                                        |                                                                                                                                                                   |
|-------------------------------------------------------------|-------------------------------|------------|--------------|-------------------------------------------------|-----------------------------------------------------------------|------------------------------------------------------------------------------------------------------------------------------------------------------------------------------------------------------------------------------------------------------------------------|---------------------------------------------------------------------------------------------------------------|--------------------------------------------------------------------------------------------------------------------------------------------------------|-------------------------------------------------------------------------------------------------------------------------------------------------------------------|
| <b>Bloem, 1995</b>                                          | Interrupted time-series study | Bangladesh | 12-59 months | ~124,606                                        | Vitamin A supplementation                                       | 1 capsule: 200,000IU                                                                                                                                                                                                                                                   | Every 6 months                                                                                                | No intervention                                                                                                                                        |                                                                                                                                                                   |
| <b>Bougma, 2018</b>                                         | cRCT                          | Ethiopia   | 5-11 months  | 2136 (60 clusters)                              | Iodine fortified salt                                           |                                                                                                                                                                                                                                                                        | Usual use for 8-10 months                                                                                     | Iodine (iodised salt gradually made available through regular market channels once production was sufficient and legislation was enforced in Oct 2012) | Usual use for 4-6 months                                                                                                                                          |
| <b>Caufield, 2013</b><br><br>Associated refs: Colombo, 2014 | RCT                           | Peru       | 6 months     | 251                                             | MMN (iron, copper, zinc) supplementation                        | Liquid: iron (10mg), copper (0.5mg), zinc (10mg)                                                                                                                                                                                                                       | Daily for 12 months                                                                                           | Iron and copper                                                                                                                                        | Liquid: iron (10mg) and copper (0.5mg)                                                                                                                            |
| <b>Chen, 2010</b>                                           | RCT                           | China      | 4-12 months  | 1478 in main trial; 475 in this follow up study | MNP fortified whole soybean flour                               | 10g sachet: iron (6mg), zinc (4.1mg), calcium (385mg), vitamin B2 (0.2mg), vitamin D (7.0ug), protein (3.8g), energy (167kJ)                                                                                                                                           | Daily for 12-20 months                                                                                        | No intervention                                                                                                                                        |                                                                                                                                                                   |
| <b>Chen, 2012</b>                                           | cRCT                          | China      | 36-72 months | 361                                             | 1) vitamin A and zinc supplementation<br>2) MMN supplementation | 1) 1 capsule: vitamin A (25000IU), 1 tablet: zinc (10mg)<br>2) 1 tablet: vitamin A (5000IU), vitamin B1 (1.5mg), vitamin B2 (1.7mg), vitamin B6 (2mg), vitamin B12 (4ug), vitamin C (50mg), vitamin D (400IU), folic acid (100ug), niacinamide (20mg), calcium (162mg) | 1) vitamin A once every 14 days and zinc 5 times a week for 6 months<br>2) 5 times every 14 days for 6 months | Vitamin A                                                                                                                                              | 1 capsule: 25,000IU<br>Frequency/duration: once every 14 days for 6 months                                                                                        |
| <b>Cobra, 1997</b>                                          | RCT                           | Indonesia  | 6-10 weeks   | 617                                             | Iodine supplementation                                          | 1 capsule: 100mg                                                                                                                                                                                                                                                       |                                                                                                               | Placebo                                                                                                                                                |                                                                                                                                                                   |
| <b>de Almeida, 2005</b>                                     | cRCT                          | Brazil     | 12-75 months | 150 (6 clusters)                                | MNP (with iron and vitamin C) in drinking water                 | 10 mg of iron and 100 mg of ascorbic acid per liter water (the pre-mix contained 1000 mg of FeSO4-7H2O and 2000 mg of ascorbic acid diluted in 20 ml of water)                                                                                                         | Usual use for 6 months                                                                                        | MNP (with vitamin C only) in drinking water                                                                                                            | Water with 10mg of iron and 100mg of ascorbic acid per liter (the pre-mix contained 1000 mg of FeSO4-7H2O and 2000 mg of ascorbic acid diluted in 20 ml of water) |

|                                                                   |                                                     |            |             |                                |                                                 |                                                                                                                                                                                                                           |                                                                                                                                                                                                                |                                         |                     |
|-------------------------------------------------------------------|-----------------------------------------------------|------------|-------------|--------------------------------|-------------------------------------------------|---------------------------------------------------------------------------------------------------------------------------------------------------------------------------------------------------------------------------|----------------------------------------------------------------------------------------------------------------------------------------------------------------------------------------------------------------|-----------------------------------------|---------------------|
| <b>DeLong, 1997</b>                                               | Controlled before-after study                       | China      |             |                                | Iodine fortified irrigation water               | Long Ru: 1992 - 30kg given to an area of 4 villages, 1993 - 80kg given to same areas; Bakechi: 80kg given to an area of 8 villages<br>Tusala: 80kg given to an area of 15 villages                                        | Long Ru: 1992, 1993<br>Bakechi: 1993<br>Tusala: 1994                                                                                                                                                           | No intervention                         |                     |
| <b>Dutra-de-Oliveira, 2002</b>                                    | RCT                                                 | Brazil     | 1-6 years   | 21 families (88 members)       | MNP (with iron and vitamin C) in drinking water | 10mL iron solution to 10L of water: elemental iron (10mg) and ascorbic acid (60mg) per L of drinking water                                                                                                                | Daily for 4 months                                                                                                                                                                                             | Placebo                                 |                     |
| <b>Fawzi, 1998</b>                                                | RCT                                                 | Sudan      | 9-72 months | 28,753                         | Vitamin A supplementation                       | 1 capsule: 200,000IU                                                                                                                                                                                                      | Bi-annually for 18 months                                                                                                                                                                                      | Placebo                                 |                     |
| <b>Galasso, 2019</b>                                              | cRCT                                                | Madagascar | 6-18 months | 3738 households (125 clusters) | LNS                                             | 20g                                                                                                                                                                                                                       | Children in cohorts A and B (–6 months to <6 months at baseline) received the full 12 months of supplementation daily. Children in cohort C (6 months to <12 months) received daily LNS for 12 months or less. | No intervention                         |                     |
| <b>Gebremedin, 2014</b>                                           | Propensity score matched retrospective cohort study | Ethiopia   | 6-59 months | 4794                           | Vitamin A supplementation                       | Children aged 6–11 and 12–59 months are given 100,000 and 200,000 IU of VA (i.e. 30 and 60 mg of retinol), respectively in the form of a capsule                                                                          | 1 dose (within the preceding 6 months of the survey)                                                                                                                                                           | No intervention                         |                     |
| <b>Hadler, 2008</b><br><br><b>Associated refs: Medeiros, 2015</b> | cRCT                                                | Brazil     | 6-24 months | 192 (25 clusters)              | IFA supplementation                             | Drops: iron (1.4mg/kg/day), folic acid (50ug)                                                                                                                                                                             | 5 days a week for ~3 months                                                                                                                                                                                    | Iron and folic acid placebo             | Iron (1.4mg/kg/day) |
| <b>Hettiarachchi, 2010</b>                                        | cRCT                                                | Sri Lanka  | 3-5 years   | 267                            | LNS food supplement Thripasha                   | Per 100g: energy (401.8 cal), fat (7.8g), minerals (4.0g), protein (20g), carbohydrates (61.9g), vitamin A (1700IU), vitamin D (200IU), vitamin E (6IU), vitamin C (40mg), vitamin B6 (6mg), vitamin B12 (4mcg), thiamine | Daily for 9 months                                                                                                                                                                                             | Unfortified Thripasha (corn-soya blend) | 50g                 |



|                           |         |           |                  |                    |                               |                                                                                                                                                                                                                                                                                                                                                                                                                                            |                                               |                          |  |
|---------------------------|---------|-----------|------------------|--------------------|-------------------------------|--------------------------------------------------------------------------------------------------------------------------------------------------------------------------------------------------------------------------------------------------------------------------------------------------------------------------------------------------------------------------------------------------------------------------------------------|-----------------------------------------------|--------------------------|--|
|                           |         |           |                  |                    |                               | (760mcg), riboflavin (560mcg), niacin (8mg), folic acid (200mcg), pantothenic acid (3mg), calcium (900mg), phosphorus (670mg), magnesium (96mg), iron (18mg), zinc (3mg), iodine (44mcg). Children were given 50g/day                                                                                                                                                                                                                      |                                               |                          |  |
| <b>Iannotti, 2014</b>     | RCT     | Haiti     | 6-11 months      | 589                | LNS                           | 20g: protein (2.56g), fat (7.08g), linoleic acid (1.29g), alpha linoleic acid (0.29g), vitamin A (400ug), thiamin (0.3mg), riboflavin (0.4mg), niacin (4mg), pantothenic acid (1.8mg), vitamin B6 (0.3mg), vitamin B12 (0.5mg), folic acid (80ug), vitamin C (30mg), calcium (100mg), copper (0.2mg), iodine (90ug), iron (9mg), magnesium (16mg), manganese (0.08mg), phosphorus (82.2mg), potassium (152mg), selenium (10ug), zinc (4mg) | Daily for 6 months                            | No intervention          |  |
| <b>Isanaka, 2009</b>      | cRCT    | Niger     | 6-60 months      | 3533 (12 clusters) | LNS                           | 92g (500 kcal/day)                                                                                                                                                                                                                                                                                                                                                                                                                         | Daily for 3 months                            | No intervention          |  |
| <b>Kapur, 2003</b>        | RCT     | India     | 9-36 months      | 451                | Iron                          | 20mg                                                                                                                                                                                                                                                                                                                                                                                                                                       | Weekly for 8 weeks                            | Placebo                  |  |
| <b>Kartasasmita, 1995</b> | RCT     | Indonesia | 12-54 months     | 269                | Vitamin A supplementation     | 200,000IU                                                                                                                                                                                                                                                                                                                                                                                                                                  | 2 doses (one at baseline and one at 6 months) | Placebo                  |  |
| <b>Kujinga 2018</b>       | RCT     | Kenya     | 2-6 years        | 184                | Zinc fortified filtered water | 8mg/L water                                                                                                                                                                                                                                                                                                                                                                                                                                | Usual use for 25 weeks                        | Placebo (filtered water) |  |
| <b>Lopez, 2006</b>        | Non-RCT | Peru      | 6 months-4 years | 866                | MMN supplementation           | 1 foodlet: vitamin A as acetate (750ug), vitamin D (10ug), vitamin E (12IU), vitamin C (70mg), niacin (12mg), thiamine (1mg), riboflavin (1mg), pyridoxine (1mg), vitamin B12 (1.8mg), folic acid (300ug), iron as ferrous fumarate (20mg), zinc as zinc gluconate (20mg), copper as cupric gluconate (1.2mg), iodine as potassium iodide (100ug)                                                                                          | Weekly for 8 weeks                            | No intervention          |  |

|                                                                                  |         |              |             |      |                                                                 |                                                                                                                                                                                                                                                                                                                                                                                                                                                                          |                              |                                       |                                                                                                         |
|----------------------------------------------------------------------------------|---------|--------------|-------------|------|-----------------------------------------------------------------|--------------------------------------------------------------------------------------------------------------------------------------------------------------------------------------------------------------------------------------------------------------------------------------------------------------------------------------------------------------------------------------------------------------------------------------------------------------------------|------------------------------|---------------------------------------|---------------------------------------------------------------------------------------------------------|
| <b>Luabeya, 2007</b><br><br><b>Associated refs: Chhagan, 2009; Chhagan, 2010</b> | RCT     | South Africa | 4-6 months  | 373  | 1) Vitamin A and zinc supplementation<br>2) MMN supplementation | 1) 1 tablet: zinc (10mg), vitamin A (1250IU)<br>2) 1 tablet: zinc (10mg), vitamin A (1250IU), vitamin B1 (0.5mg), vitamin B2 (0.5mg), vitamin B6 (0.5mg), vitamin B12 (0.9ug), vitamin C (35mg), vitamin D (5ug), vitamin E (6mg), vitamin K (10ug), copper (0.6mg), folate (150ug), iodine (50ug), iron (10mg), niacin (6mg)                                                                                                                                            | Daily for 18 months          | Vitamin A supplementation             | 1 tablet: 1250IU                                                                                        |
| <b>Lutter, 2008</b>                                                              | Non-RCT | Ecuador      | 9-14 months | 634  | MMN fortified cereal and legume flour                           | 65g                                                                                                                                                                                                                                                                                                                                                                                                                                                                      | Daily for 11 months          | No intervention                       |                                                                                                         |
| <b>Manaseki-Holland, 2012</b><br><br><b>Associated refs: Aluisio, 2013</b>       | RCT     | Afghanistan  | 1-11 months | 3046 | Vitamin D supplementation                                       | 0.5mL of syrup: vitamin D (100,000IU/2.5mg)                                                                                                                                                                                                                                                                                                                                                                                                                              | Every 3 months for 18 months | Placebo                               |                                                                                                         |
| <b>Martinez-Estevez, 2016</b>                                                    | RCT     | Colombia     | 6-12 months | 355  | MMN supplementation                                             | 3.5mm of syrup: zinc oxide (5mg), calcium carbonate (525mg), vitamin D3 (70IU)                                                                                                                                                                                                                                                                                                                                                                                           | Daily for 12 months          | Calcium and vitamin D supplementation | 3.5mm of syrup: Calcium carbonate (525mg), vitamin D3 (70IU)                                            |
| <b>Matias, 2017</b>                                                              | RCT     | Peru         | 6-11 months | 422  | LNS                                                             | 20g LNS: energy (110kcal/460.24kJ), protein (2.6g), fat (7g), linoleic acid (1.29g), $\alpha$ -Linolenic acid (0.29g), folic acid (80ug), niacin (4mg), pantothenic acid (1.8mg), riboflavin (0.4mg), thiamin (0.3mg), vitamin A (400ug), vitamin B12 (0.5ug), vitamin B6 (0.3mg), vitamin C (30mg), calcium (100mg), copper (0.2mg), iodine (90ug), iron (9mg), magnesium (16mg), manganese (0.08mg), phosphorus (82mg), potassium (152mg), selenium (10ug), zinc (4mg) | Daily for 6 months           | MNP                                   | 1 sachet: folic acid (160ug), vitamin A (300ug), vitamin C (30mg), iron (12.5mg), zinc (5mg)            |
| <b>Mitra, 1997</b>                                                               | RCT     | Bangladesh   | 2-48 months | 349  | MMN (with iron) supplementation                                 | 5mL of syrup: 125 mg of ferrous gluconate (15mg elemental iron), vitamin A (80,000 RE/L), vitamin D as cholecalciferol (2000ug/L), vitamin C (10,000mg/L)                                                                                                                                                                                                                                                                                                                | Daily for 15 months          | MMN (without iron) supplementation    | 5 mL of syrup: vitamin A (80,000 RE/L), vitamin D as cholecalciferol (2000ug/L), vitamin C (10,000mg/L) |

|                       |         |           |              |                  |                                    |                                                                                                                                                                                                                                                                                                                                                                                                                                                                                                                       |                                                       |                         |                                                                                                           |
|-----------------------|---------|-----------|--------------|------------------|------------------------------------|-----------------------------------------------------------------------------------------------------------------------------------------------------------------------------------------------------------------------------------------------------------------------------------------------------------------------------------------------------------------------------------------------------------------------------------------------------------------------------------------------------------------------|-------------------------------------------------------|-------------------------|-----------------------------------------------------------------------------------------------------------|
| <b>Muslihah, 2016</b> | Non-RCT | Indonesia | 6-12 months  | 269              | LNS                                | 20g LNS: energy (118kcal), protein (2.6g), lipids (9.9g), linoleic acid (2.8g), a-linolenic acid (0.58g), vitamin A (400ug), vitamin B1 (0.5mg), vitamin B2 (0.5mg), vitamin B3 (6.0mg), vitamin B5 (2.0mg), vitamin B6 (0.5mg), vitamin B12 (0.9ug), folic acid (150ug), vitamin C (30mg), vitamin D (10ug), vitamin E (6mg), vitamin K (30ug), calcium (280mg), copper (0.34mg), iodine (90ug), iron (6mg), magnesium (40mg), manganese (1.2mg), phosphorus (190mg), potassium (200mg), selenium (20ug), zinc (8mg) | Daily for 6 months                                    | No intervention         |                                                                                                           |
| <b>Nair, 2017</b>     | Non-RCT | India     | 4-6 months   | 44               | Iron and vitamin D supplementation | Iron (2mg/kg)                                                                                                                                                                                                                                                                                                                                                                                                                                                                                                         | Daily for 6-8 months (enrollment until 1 year of age) | Vitamin D               |                                                                                                           |
| <b>Newton, 2016</b>   | RCT     | Ghana     | 7-9 months   | 93               | MNP (with vitamin A)               | 1 sachet: elemental iron (12.5mg) as microencapsulated ferrous fumarate, ascorbic acid (30mg), retinyl palmitate (400ug RE), zinc (5mg)                                                                                                                                                                                                                                                                                                                                                                               | Daily for 5 months                                    | MNP (without vitamin A) | 1 sachet: elemental iron (12.5mg) as microencapsulated ferrous fumarate, ascorbic acid (30mg), zinc (5mg) |
| <b>Nogueira, 2012</b> | cRCT    | Brazil    | 10-23 months | 216 (2 clusters) | Iron fortified rice                | 50g portion: elemental iron (56.4mg) as micronized ferric pyrophosphate (MFPP)                                                                                                                                                                                                                                                                                                                                                                                                                                        | Weekly for 18 weeks                                   | Unfortified rice        |                                                                                                           |
| <b>Noor, 2018</b>     | RCT     | Pakistan  | 6-11 months  | 120              | Zinc supplementation               | 20mg                                                                                                                                                                                                                                                                                                                                                                                                                                                                                                                  | Daily for 14 days                                     | Placebo                 |                                                                                                           |
| <b>Oliveira, 2016</b> | Non-RCT | Brazil    | 6-14 months  | 326              | MNP                                | 10 mg Fe (encapsulated ferrous fumarate), 4·1 mg Zn (zinc gluconate), 150 µg folic acid, 400 µg vitamin A (retinol equivalents), 30 mg vitamin C (ascorbic acid), 5 µg cholecalciferol, 5 mg vitamin E (tocopherol equivalents), 0·5 mg thiamin, 0·5 mg riboflavin, 0·5 mg vitamin B6, 0·9 µg vitamin B12, 6 mg niacin, 0·56 mg Cu, 90 µg iodine and 17 µg Se                                                                                                                                                         | Daily for 60 days                                     | No intervention         |                                                                                                           |

|                          |      |              |                                   |                            |                                    |                                                                                                                                                                                                                                                                                                                                                                                                                                                                                                                                                                                                                                                                                                                                                                                                                                                                                                                        |                                                                   |                            |                                                                                  |
|--------------------------|------|--------------|-----------------------------------|----------------------------|------------------------------------|------------------------------------------------------------------------------------------------------------------------------------------------------------------------------------------------------------------------------------------------------------------------------------------------------------------------------------------------------------------------------------------------------------------------------------------------------------------------------------------------------------------------------------------------------------------------------------------------------------------------------------------------------------------------------------------------------------------------------------------------------------------------------------------------------------------------------------------------------------------------------------------------------------------------|-------------------------------------------------------------------|----------------------------|----------------------------------------------------------------------------------|
| <b>Olney, 2018</b>       | cRCT | Guatemala    | Supplementation given at 6 months | ~39,000 mother/child pairs | LNS                                | 2 x 10 g sachets: 118 kcal, protein 2.6g, fat 9.6g, linoleic acid 4.5g, alpha-linoleic acid 0.6g, Vit A 400ug, Vit C 30mg, vit D 5mg, Vit E 6mg, Vit K 30mg, Vit B1 (thiamin) 0.5mg, Vitamin B2 (riboflavin) 0.5 mg, niacin mg, pantothenic acid 2 mg, vitamin B6, 0.5mg, folic acid 150 ug, vit B12 0.9 ug, iron 9mg, zinc 8mg, copper 0.3mg, selenium 20ug, iodine 90ug, calcium 280mg, magnesium 40mg, manganese 1.2mg, phosphorus 190 mg, potassium 200 mg.<br>Intervention Arm 3: MNP (micronutrient powder) (4g or 2 x2g sachets), each containing Vit A 400ug, Vit C 30mg, vit D 5mg, Vit E 6mg, Vit K 30mg, Vit B1 (thiamin) 0.5mg, Vitamin B2 (riboflavin) 0.5 mg, niacin mg, pantothenic acid 2 mg, vitamin B6, 0.5mg, folic acid 150 ug, vit B12 0.9 ug, iron 9mg, zinc 8mg, copper 0.3mg, selenium 20ug, iodine 90ug, calcium 280mg, magnesium 40mg, manganese 1.2mg, phosphorus 190 mg, potassium 200 mg. | Daily for 18 months                                               | Placebo                    |                                                                                  |
| <b>Ouedraogo, 2010</b>   | RCT  | Burkina Faso | 6-23 months                       | 131                        | MMN fortified gruel                | 8 mg elemental iron (as ferrous fumarate), 5 mg zinc (as zinc gluconate), 300mg vitamin A (as retinyl acetate), 30 mg ascorbic acid and 60 mg iodine (as potassium iodate)                                                                                                                                                                                                                                                                                                                                                                                                                                                                                                                                                                                                                                                                                                                                             | MMN once daily (6 days a week) and gruel twice daily for 6 months | Unfortified gruel          |                                                                                  |
| <b>Owusu-Agyei, 2013</b> | RCT  | Ghana        | 6-24 months                       | 200                        | Vitamin A and zinc supplementation | Vitamin A: 100,000 IU for <12mo of age or 200 000 IU for older children, and 10mg zinc capsule                                                                                                                                                                                                                                                                                                                                                                                                                                                                                                                                                                                                                                                                                                                                                                                                                         | Daily for 6 months                                                | Vitamin A and zinc placebo | 100,000IU for <12 mos of age or 200,000IU for older children and placebo capsule |

|                                                                            |         |                                 |                    |     |                                 |                                                                                                                                                                                                                                                                                                                                                                                     |                     |                                    |                                                                                                                                                                                                                                                                                                                   |
|----------------------------------------------------------------------------|---------|---------------------------------|--------------------|-----|---------------------------------|-------------------------------------------------------------------------------------------------------------------------------------------------------------------------------------------------------------------------------------------------------------------------------------------------------------------------------------------------------------------------------------|---------------------|------------------------------------|-------------------------------------------------------------------------------------------------------------------------------------------------------------------------------------------------------------------------------------------------------------------------------------------------------------------|
| <b>Paganini, 2017</b>                                                      | RCT     | Kenya                           | 6.5-9.5 months     | 155 | MNP (with iron)                 | 1 sachet: vitamin A(400ug), vitamin D(5ug), tocopherol equivalents(5mg), thiamine (0.5mg), riboflavin(0.5mg), vitaminB6(0.5mg), folic acid(90ug), vitamin C,(30mg), copper(0.56mg), iodine(90ug), selenium(17ug), zinc(4.1mg), phytase(190 FTU), Iron(as ferrous fumarate)(2.5mg), iron(as NaFeEDTA)(2.5mg)+ maltodextrin(add to 11g)                                               | Daily for 4 months  | MNP (without iron)                 | 1 sachet: vitamin A(400ug), vitamin D(5ug), tocopherol equivalents(5mg), thiamine (0.5mg), riboflavin(0.5mg), vitamin B6 (0.5mg), folic acid (90ug), vitamin C (30mg), copper(0.56mg), iodine(90ug), selenium (17ug), zinc(4.1mg), phytase(190 FTU), Iron (as ferrous fumarate) (2.5mg), Maltodextrin(add to 11g) |
| <b>Phuka, 2008</b><br><br><b>Associated refs: Phuka, 2009; Phuka, 2012</b> | RCT     | Malawi                          | 5.5 to 6.99 months | 182 | LNS                             | 50g: energy (256 kcal), protein (7.0g), carbohydrates (13.8g), fat (16.9g), retinol (400ug RE), folate (160ug), niacin (6mg), pantothenic acid (2mg), riboflavin (0.5mg), thiamin (0.5mg), vitamin B6 (0.5mg), vitamin B12 (0.9ug), vitamin C (30mg), vitamin D (5ug), calcium (366mg), copper (0.4mg), iodine (135ug), iron (8mg), magnesium (60mg), selenium (17ug), zinc (8.4mg) | Daily for 1 year    | MMN fortified maize flour          | 71g: energy (282kcal), protein (10.3g), fat (3.1g), retinol (138ug RE), folate (43ug), niacin (3mg), riboflavin (0.3mg), thiamin (0.1mg), vitamin B6 (0.3mg), vitamin B12 (0.9ug), vitamin C (48mg), calcium (71mg), iron (5mg), zinc (3.6mg)                                                                     |
| <b>Rahman, 1999</b>                                                        | RCT     | Bangladesh                      | 6-71 months        | 250 | MMN (with iron) supplementation | 5mL of syrup: 125 mg of ferrous gluconate (15 mg elemental iron), vitamin A [80,000 retinol equivalents (RE)/L], vitamin D (2mg cholecalciferol/L) and vitamin C (10g/L)                                                                                                                                                                                                            | Daily for 12 months | MMN (without iron) supplementation | 5mL of syrup: vitamin A [80,000 retinol equivalents (RE)/L], vitamin D (2mg cholecalciferol/L) and vitamin C (10g/L)                                                                                                                                                                                              |
| <b>Rooze, 2016</b>                                                         | Non-RCT | China (Tibet Autonomous Region) | 0-5 years          | 207 | Vitamin D supplementation       | 625ug                                                                                                                                                                                                                                                                                                                                                                               | Monthly for 3 years | No intervention                    |                                                                                                                                                                                                                                                                                                                   |
| <b>Sampaio, 2013</b>                                                       | RCT     | Brazil                          | 6-48 months        | 143 | MNP (with zinc)                 | 1 sachet: vitamin A (vitamin A acetate) (375mcg), vitamin B1 (thiamine mononitrate) (0.5mg), vitamin B2 (riboflavin) (0.5 mg), vitamin B6 (pyridoxine) (0.5 mg), vitamin B12 (cyanocobalamin) (0.9 mcg), vitamin C (ascorbic acid) (35 mg), vitamin D3 (cholecalciferol) (5.0 mcg),                                                                                                 | Daily for 90 days   | MNP (without zinc)                 | 1 sachet: vitamin A (vitamin A acetate) (375mcg), vitamin B1 (thiamine mononitrate) (0.5mg), vitamin B2 (riboflavin) (0.5 mg), vitamin B6 (pyridoxine) (0.5 mg), vitamin B12 (cyanocobalamin) (0.9 mcg), vitamin C (ascorbic acid) (35 mg), vitamin D3                                                            |

|                                                                                             |                    |       |              |      |                                                                         |                                                                                                                                                                                                                                                                                                                                                          |                                         |                                     |                                                                                                                                                                                                                                            |
|---------------------------------------------------------------------------------------------|--------------------|-------|--------------|------|-------------------------------------------------------------------------|----------------------------------------------------------------------------------------------------------------------------------------------------------------------------------------------------------------------------------------------------------------------------------------------------------------------------------------------------------|-----------------------------------------|-------------------------------------|--------------------------------------------------------------------------------------------------------------------------------------------------------------------------------------------------------------------------------------------|
|                                                                                             |                    |       |              |      |                                                                         | vitamin E (vitamin E acetate) (6.0 mg), niacin (niacinamide) (6.0 mg), copper (copper sulfate) (0.6 mg), iodine (potassium iodide) (50 mcg), iron (ferrous fumarate) (12.5 mg), zinc (zinc gluconate) (5.0 mg)                                                                                                                                           |                                         |                                     | (cholecalciferol) (5.0 mcg), vitamin E (vitamin E acetate) (6.0 mg), niacin (niacinamide) (6.0 mg), copper (copper sulfate) (0.6 mg), iodine (potassium iodide) (50 mcg), iron (ferrous fumarate) (12.5 mg)                                |
| <b>Sazawal, 1997</b><br><br><b>Associated refs: Sazawal, 1998</b>                           | RCT                | India | 6-35 months  | 609  | MMN (zinc) supplementation                                              | 5 mL of liquid: vitamin A (240ug retinol equivalents), thiamine (0.6 mg), riboflavin (0.5 mg), vitamin B-6 (0.5 mg), cholecalciferol (2.5ug). vitamin E (3 mg a-tocopherol equivalents), niacin (10 mg niacin equivalents), zinc gluconate (10 mg elemental Zn). During diarrheal illness, this was increased to 10mL to provide for excess stool losses | Daily for 6 months                      | MMN (without zinc) supplementation  | 5 mL of liquid: vitamin A (240ug retinol equivalents), thiamine (0.6 mg), riboflavin (0.5 mg), vitamin B-6 (0.5 mg), cholecalciferol (2.5ug). vitamin E (3 mg a-tocopherol equivalents), niacin (10 mg niacin equivalents)                 |
| <b>Swami, 2007</b>                                                                          | Natural experiment | India | 1-5 years    | 528  | Vitamin A supplementation                                               |                                                                                                                                                                                                                                                                                                                                                          | Two rounds of vitamin A supplementation | No intervention                     |                                                                                                                                                                                                                                            |
| <b>Taneja, 2013</b><br><br><b>Associated refs: Kumar, 2017; Kvestad, 2015; Strand, 2015</b> | RCT                | India | 6-30 months  | 1000 | 1) LNS (with folic acid only)<br>2) LNS (with vitamin B12 only)         | 1) 5g for children 6-11 months of age and 10g for children ≥12 months; Per 10g: energy (54.1kcal), protein (0.7g), fat (3.3g), folic acid (150ug)<br>2) 5g for children 6-11 months of age and 10g for children ≥12 months; Per 10g: energy (54.1kcal), protein (0.7g), fat (3.3g), vitamin B12 (1.8ug)                                                  | Daily for 6 months                      | LNS (without vitamins and minerals) | 5g for children 6-11 months of age and 10g for children ≥12 months; Per 10g: energy (54.1kcal), protein (0.7g), fat (3.3g)                                                                                                                 |
| <b>Teshome, 2017</b>                                                                        | RCT                | Kenya | 12-36 months | 338  | 1) MNP (with iron as NaFeDTA)<br>2) MNP (with iron as ferrous fumarate) | 1 and 2) 1 sachet: vitamin A (300ug RE) vitamin D (5ug), vitamin E (5mg), vitamin C (30mg), thiamin (0.5mg), riboflavin (0.5mg), niacin (6mg), vitamin B6 (0.5mg), vitamin B12 (0.9ug), iron (either NaFeDTA 3mg or ferrous fumarate 12.5mg), zinc (5mg), copper (0.56mg),                                                                               | Daily for 30 days                       | MNP (without iron)                  | 1 sachet: vitamin A (300ug RE) vitamin D (5ug), vitamin E (5mg), vitamin C (30mg), thiamin (0.5mg), riboflavin (0.5mg), niacin (6mg), vitamin B6 (0.5mg), vitamin B12 (0.9ug), zinc (5mg), copper (0.56mg), selenium (17ug), iodine (90ug) |

|                                                              |                               |       |                                                     |                                                |                        |                                                                                                                                 |                           |                      |                                                                |
|--------------------------------------------------------------|-------------------------------|-------|-----------------------------------------------------|------------------------------------------------|------------------------|---------------------------------------------------------------------------------------------------------------------------------|---------------------------|----------------------|----------------------------------------------------------------|
|                                                              |                               |       |                                                     |                                                |                        | selenium (17ug), iodine (90ug)                                                                                                  |                           |                      |                                                                |
| <b>Venkatarao, 1996</b>                                      | RCT                           | India | At birth (supplementation given at 6 months of age) | 909                                            | Vitamin A              | 200,000IU                                                                                                                       | 1 dose at 6 months of age | Placebo              |                                                                |
| <b>Warthon-Medina, 2015</b>                                  | RCT                           | Peru  | 6-17 months                                         | 902 in main trial; 200 in this follow-up study | MNP                    | 1 sachet: iron (12.5mg), zinc gluconate (10mg), folic acid (160ug), vitamin C (30mg), vitamin A (300ug)                         | Daily for 6 months        | MNP (with iron only) | 1 sachet: 12.5mg                                               |
| <b>Yadav, 2012</b>                                           | Controlled before-after study | India | 12-50 months                                        |                                                | Fortified blended food |                                                                                                                                 | Duration: ~30 months      | No intervention      |                                                                |
| <b>Zlotkin, 2013</b><br><b>Associated refs: Aimore, 2013</b> | cRCT                          | Ghana | 6-35 months                                         | 1958 (1552 clusters)                           | MNP (with iron)        | 1 sachet: elemental iron (as microencapsulated ferrous fumarate) (12.5mg), ascorbic acid (30mg), vitamin A (400µg), zinc (5 mg) | Daily for 5 months        | MNP (without iron)   | 1 sachet: ascorbic acid (30mg), vitamin A (400µg), zinc (5 mg) |

## Appendix 3 – Eligible Studies Included in Meta-Analyses

| First author, year                                                          | Study design | Country    | Age range enrolled                                  | Total study population        | Intervention arms used in meta-analysis                                     | Intervention dose and formulation                                                                                                                                                                                                                                                                                                                                                                                                                                                                                                                                                                                                        | Intervention duration and frequency | Control                                 | Control dose and formulation |
|-----------------------------------------------------------------------------|--------------|------------|-----------------------------------------------------|-------------------------------|-----------------------------------------------------------------------------|------------------------------------------------------------------------------------------------------------------------------------------------------------------------------------------------------------------------------------------------------------------------------------------------------------------------------------------------------------------------------------------------------------------------------------------------------------------------------------------------------------------------------------------------------------------------------------------------------------------------------------------|-------------------------------------|-----------------------------------------|------------------------------|
| <b>Aboud, 2011</b>                                                          | cRCT         | Bangladesh | 8-20 months                                         | 302 (mother and child pairs)  | MNP (Efficacy)                                                              | 1 sachet: Iron (12.5mg), vitamin A (300ug), folic acid (150ug), vit C (50mg), zinc (5mg)                                                                                                                                                                                                                                                                                                                                                                                                                                                                                                                                                 | Daily for 6 months                  | No intervention                         |                              |
| <b>Adu-Afarwuah, 2007</b><br><br><b>Associated refs: Adu-Afarwuah, 2008</b> | RCT          | Ghana      | 6 months                                            | 409                           | 1) MNP (Efficacy)<br>2) MMN supplementation (Efficacy)<br>2) LNS (Efficacy) | 1) 1 sachet: beta-carotene (300mcg RE), vit C (50mg), vit D (7.5mcg), folic acid (150mcg), iron (fumarate) (12.5mg), zinc (5mg)<br>2) 1 tablet: beta-carotene (400mcg RE), vit C (30mg), folic acid (80mcg), thiamine (0.3mg), riboflavin (0.4mg), vit B3 (4mg), pantothenic acid (1.8mg), vit B6 (0.3mg), vit B12 (0.5mg), iron (sulfate) (9mg), zinc (4mg), calcium (100mg), potassium (152mg), copper (0.2mg), selenium (10mcg), iodine (90mcg)<br>3) 20g: all nutrients in intervention 2 + phosphorus (82mg), magnesium (16mg), manganese (0.08mg), energy (108kcal), linoleic acid (1.29g), linolenic acid (0.29g), phytate (82mg) | Daily for 6 months                  | No intervention (recruited at baseline) |                              |
| <b>Adu-Afarwuah, 2016</b><br><br><b>Associated refs: Prado, 2016a</b>       | RCT          | Ghana      | At birth (supplementation given at 6 months of age) | 1228 infants;<br>1320 mothers | LNS (Efficacy)                                                              | 20g: energy (118kcal), protein (2.6g), fat (9.6g), linoleic acid (4.46g), a-linolenic acid (0.58g), vitamin A (400mg RE), thiamin (0.3mg), riboflavin (0.4mg), niacin (4mg), vitamin B-6 (0.3mg), vitamin B-12 (0.5mg), vitamin C (30mg), vitamin D (5mg), vitamin E (6mg), vitamin K (30mg), folic acid (80mg),                                                                                                                                                                                                                                                                                                                         | Daily for 12 months                 | No intervention                         |                              |



|                                                                  |      |                    |                                                      |                               |                                                                                   |                                                                                                                                                                                                                                                    |                                                                                                                                                           |                                                                       |                                                                                                             |
|------------------------------------------------------------------|------|--------------------|------------------------------------------------------|-------------------------------|-----------------------------------------------------------------------------------|----------------------------------------------------------------------------------------------------------------------------------------------------------------------------------------------------------------------------------------------------|-----------------------------------------------------------------------------------------------------------------------------------------------------------|-----------------------------------------------------------------------|-------------------------------------------------------------------------------------------------------------|
|                                                                  |      |                    |                                                      |                               |                                                                                   | pantothenic acid (1.8mg), iron (6mg), zinc (8mg), copper (0.34mg), calcium (280mg), phosphorus (190mg), potassium (200mg), magnesium (40mg), selenium (20mg), iodine (90mg), and manganese (1.2mg)                                                 |                                                                                                                                                           |                                                                       |                                                                                                             |
| <b>Agarwal, 1995</b>                                             | cRCT | India              | 1-72 months                                          | 15, 247                       | Vitamin A (and vitamin E) supplementation (Efficacy)                              | 15mL of syrup: children 1-6 months of age: vitamin A (50,000IU), vitamin E (10IU); children 7-72 months of age: vitamin A (100,000IU), vitamin E (20 IU)                                                                                           | Every 4 months for 12 months                                                                                                                              | Placebo: vitamin E supplementation                                    | 15 mL of syrup: children 1-6 months of age: vitamin E (10IU); children 7-72 months of age: vitamin E (20IU) |
| <b>Anand 2007</b>                                                | RCT  | India              | 3-6 years                                            | 415                           | MMN fortified candy (Targeted fortification – efficacy)                           | 1 candy: vit A (1000IU), elemental iron (14mg), folic acid (50ug), ascorbic acid (20mg)                                                                                                                                                            | 6 days a week for 12 weeks                                                                                                                                | Placebo: Unfortified candy                                            |                                                                                                             |
| <b>Anonymous, 1998</b><br><br><b>Associated refs: Bahl, 2002</b> | RCT  | Ghana, India, Peru | Newborns (supplementation given at >2 months of age) | 9424 (mother and child pairs) | Vitamin A supplementation (Efficacy)                                              | 1 capsule: 25,000IU/7.5mg                                                                                                                                                                                                                          | 4 doses; at DPT/poliomyelitis and Measles immunization: India and Ghana: 6, 10 and 14 weeks and 9 months of age; Peru: 2, 3, 4 months and 9 months of age | Placebo & vitamin A at 9 months of age (and mothers received placebo) | Placebo (first 3 doses); 1 capsule: 100,000IU/30mg of vitamin A (4th dose)                                  |
| <b>Arcanjo, 2012</b>                                             | cRCT | Brazil             | 4 years                                              | 120                           | Iron fortified milk-based cornstarch porridge (Targeted fortification – efficacy) | 600 mg ferrous sulfate in liquid form (10 mg elemental iron per portion)                                                                                                                                                                           | Daily for 14 weeks                                                                                                                                        | Unfortified milk-based cornstarch porridge                            |                                                                                                             |
| <b>Arcanjo, 2019</b>                                             | cRCT | Brazil             | 12-36 months                                         | 169 (8 clusters total)        | MNP (Efficacy)                                                                    | Vitamin A (400mcg), vitamin D (5mcg), vitamin E (5mg), vitamin C (30mg), vitamin B1 (0.5mg), B2 (0.5mg), B6 (0.5mg), B12 (0.9mcg), niacin (6mg), folic acid (150mcg), iron (10mg), zinc (4.1mg), copper (0.56mg), selenium (17mcg), iodine (90mcg) | 5 days a week (Monday to Friday) for 12 weeks                                                                                                             | No intervention                                                       |                                                                                                             |

|                                                                   |      |          |                                                     |                              |                                       |                                                                                                                                                                                                                                                                                                                                                                                                                                                                                                                         |                                                                |                              |  |
|-------------------------------------------------------------------|------|----------|-----------------------------------------------------|------------------------------|---------------------------------------|-------------------------------------------------------------------------------------------------------------------------------------------------------------------------------------------------------------------------------------------------------------------------------------------------------------------------------------------------------------------------------------------------------------------------------------------------------------------------------------------------------------------------|----------------------------------------------------------------|------------------------------|--|
| <b>Ashorn, 2015</b><br><br>Associated<br>refs: Prado,<br>2016b    | RCT  | Malawi   | At birth;                                           | 781 infants;<br>869 mothers  | LNS (Efficacy)                        | 20g LNS: energy (118kcal), protein (2.6g), fat (9.6g), linoleic acid (4.46g), a-linolenic acid (0.58g), vitamin A (400mg RE), thiamin (0.3mg), riboflavin (0.4mg), niacin (4mg), vitamin B-6 (0.3mg), vitamin B-12 (0.5mg), vitamin C (30mg), vitamin D (5mg), vitamin E (6mg), vitamin K (30mg), folic acid (80mg), pantothenic acid (1.8mg), iron (6mg), zinc (8mg), copper (0.34mg), calcium (280mg), phosphorus (190mg), potassium (200mg), magnesium (40mg), selenium (20mg), iodine (90mg), and manganese (1.2mg) | Daily for 12 months                                            | No intervention              |  |
| <b>Attanasio, 2014</b><br><br>Associated<br>refs: Andrew,<br>2016 | cRCT | Colombia | 12-24 months                                        | 1420 (96 clusters)           | MNP (Efficacy and effectiveness)      | 1 sachet: iron (12.5mg), zinc (5mg), vitamin A (300µg RE), folic acid (160µg), vitamin C (30mg)                                                                                                                                                                                                                                                                                                                                                                                                                         | Daily for 18 months                                            | No intervention              |  |
| <b>Awasthi, 2013</b>                                              | cRCT | India    | ~1-6 years                                          | ~1,000,000 (72 clusters)     | Vitamin A supplementation (Efficacy)  | 1 capsule: 200,000IU                                                                                                                                                                                                                                                                                                                                                                                                                                                                                                    | Every 6 months for 5 years until children reach 6 years of age | No intervention (usual care) |  |
| <b>Ayah, 2007</b>                                                 | RCT  | Kenya    | At birth (supplementation given at 14 weeks of age) | 564 (mother and child pairs) | Vitamin A supplementation (Efficacy)  | 1 capsule: 100,000IU                                                                                                                                                                                                                                                                                                                                                                                                                                                                                                    | 1Braz dose at 14 weeks of age                                  | Placebo                      |  |
| <b>Bagni, 2009</b>                                                | cRCT | Brazil   | 12-60 months                                        | 387 (4 clusters)             | Iron fortified rice (LSFF – efficacy) | Iron (4.2mg/100g of rice); 90g of rice per meal so approx. 3.78mg of iron/week was obtained                                                                                                                                                                                                                                                                                                                                                                                                                             | Weekly for 16 weeks                                            | Unfortified rice             |  |

|                                                                                                                                         |      |                                            |             |                  |                                                                                                                                                                  |                                                                                                                                                                                                                                                                                                                                                                                                                                                                                                      |                            |                         |             |
|-----------------------------------------------------------------------------------------------------------------------------------------|------|--------------------------------------------|-------------|------------------|------------------------------------------------------------------------------------------------------------------------------------------------------------------|------------------------------------------------------------------------------------------------------------------------------------------------------------------------------------------------------------------------------------------------------------------------------------------------------------------------------------------------------------------------------------------------------------------------------------------------------------------------------------------------------|----------------------------|-------------------------|-------------|
| <b>Baqui, 2003</b><br><br><b>Associated refs:</b><br><b>Baqui, 2005;</b><br><b>Black, 2004;</b><br><b>Fischer</b><br><b>Walker 2009</b> | RCT  | Bangladesh                                 | 6 months    | 799              | 1) Iron (and riboflavin) supplementation (Efficacy)<br>2) Zinc (and riboflavin) supplementation (Efficacy)<br>3) MMN (and riboflavin) supplementation (Efficacy) | 1) Iron (20mg), riboflavin (1mg)<br>2) Zinc (20mg), riboflavin (1mg)<br>3) Iron (20mg), zinc (20mg), riboflavin (1mg), twice the WHO recommended daily intakes of iodine, copper, manganese, selenium, vitamin C, vitamin D, vitamin E, thiamin, niacin, pyridoxine, folic acid, cyanocobalamin and pantothenic acid                                                                                                                                                                                 | Weekly for 6 months        | Riboflavin              | 1mg         |
| <b>Barbosa, 2012</b>                                                                                                                    | cRCT | Brazil                                     | 2-6 years   | 324 (4 clusters) | Iron fortified wheat rolls (LSFF – efficacy)                                                                                                                     | 14 mg of iron/roll; max 3 rolls (20g each) offered per child                                                                                                                                                                                                                                                                                                                                                                                                                                         | 5 days a week per 24 weeks | Unfortified wheat rolls |             |
| <b>Barffour, 2019</b>                                                                                                                   | RCT  | Lao People's Democratic Republic (Lao PDR) | 6-23 months | 3407             | 1) Zinc supplementation (Efficacy)<br>2) MNP (Efficacy)                                                                                                          | 1) 1 tablet: zinc (7mg)<br>2) 1 sachet: zinc (10mg), iron (6mg), 13 other micronutrients                                                                                                                                                                                                                                                                                                                                                                                                             | Daily for ~9 months        | Placebo                 | Powder form |
| <b>Batra, 2016</b>                                                                                                                      | cRCT | Guinea-Bissau                              | 3-5 years   | 533 (9 clusters) | LNS (RUSF) – 15% protein from dairy sources (Efficacy and effectiveness)                                                                                         | 92g: energy (478 kcal), protein (11.5g), fat (16.7g), vitamin A (506ug), vitamin D (6.1ug), vitamin E (15.2mg), vitamin K (25.3ug), vitamin C (75.9mg), thiamin (0.5mg), riboflavin (1.0mg), niacin (12.7mg), pantothenic acid (2.0mg), pyridoxine (1.0mg), biotin (10.1ug), folic acid (202ug), cyanocobalamin (2.0ug), sodium (<278mg), potassium (734mg), calcium (476 mg), phosphorus (430mg), magnesium (142mg), copper (0.5mg), iron (4.6mg), iodine (111ug), zinc (10.1mg), selenium (30.4ug) | 5 days a week for 3 months | No intervention         |             |

|                                                                                            |      |              |             |                    |                                                                             |                                                                                                                                                                                                                                         |                              |                                                |  |
|--------------------------------------------------------------------------------------------|------|--------------|-------------|--------------------|-----------------------------------------------------------------------------|-----------------------------------------------------------------------------------------------------------------------------------------------------------------------------------------------------------------------------------------|------------------------------|------------------------------------------------|--|
| <b>Baum, 2017</b>                                                                          | cRCT | Haiti        | 6-59 months | 521 (34 clusters)  | MNP (Effectiveness)                                                         | 1 sachet: vitamin A, B, B2, B6, B12, C, D, and E, folic acid, niacin, copper, iodine, iron (2.5mg ferrous lactate), zinc and selenium                                                                                                   | Daily for 3 months           | No intervention                                |  |
| <b>Becquey, 2016</b>                                                                       | cRCT | Burkina Faso | 6-30 months | 7641 (36 clusters) | Zinc supplementation (Efficacy)                                             | 1 tablet: 7mg                                                                                                                                                                                                                           | Daily for 16, 32 or 48 weeks | No intervention/morbidity surveillance control |  |
| <b>Begin, 2008</b>                                                                         | RCT  | Guatemala    | 6-7 months  | 259                | MNP fortified maize based pudding (and whey protein concentrate) (Efficacy) | Vitamin A (400ug RE), vitamin B1 (0.4mg), vitamin B2 (0.5mg), niacin (0.6mg), vitamin B6 (0.6mg), vitamin B12 (0.5ug), vitamin C (35mg), vitamin D3 (400IU), folic acid (35ug), iron (10mg), zinc (5mg), iodine (50ug), selenium (15ug) | Daily for 8 months           | Whey protein concentrate maize based pudding   |  |
| <b>Bentley, 1997</b><br><br>Associated refs: Rivera, 1998; Ruel, 1997                      | RCT  | Guatemala    | 6-9 months  | 108                | Zinc supplementation (Efficacy)                                             | 4mL liquid: 10mg                                                                                                                                                                                                                        | Daily for 7 months           | Placebo                                        |  |
| <b>Berger, 2000</b>                                                                        | RCT  | Togo         | 6-36 months | 197                | Iron supplementation (Efficacy)                                             | 1 tablet: 2–3 mg of elemental iron per kg of body weight                                                                                                                                                                                | Daily for 3 months           | Placebo                                        |  |
| <b>Berger, 2006</b>                                                                        | RCT  | Vietnam      | 4-7 months  | 915                | 1) Iron supplementation (Efficacy)<br>2) Zinc supplementation (Efficacy)    | 1) Syrup: 10mg<br>2) Syrup: 10mg                                                                                                                                                                                                        | Daily for 6 months           | Placebo                                        |  |
| <b>Bhandari, 2002a</b><br><br>Associated refs: Bhandari, 2002b; Taneja, 2005; Taneja, 2010 | RCT  | India        | 6-30 months | 2482               | Zinc supplementation (Efficacy)                                             | 6 mL for infants: 10mg; 12 mL to older children: 20mg                                                                                                                                                                                   | Daily for 4 months           | Placebo                                        |  |

|                                                                 |         |            |                                                             |                                               |                                                                                                                                                                                                        |                                                                                                                                                                                                                                                                                                                     |                                                                                                                                                               |                       |                 |
|-----------------------------------------------------------------|---------|------------|-------------------------------------------------------------|-----------------------------------------------|--------------------------------------------------------------------------------------------------------------------------------------------------------------------------------------------------------|---------------------------------------------------------------------------------------------------------------------------------------------------------------------------------------------------------------------------------------------------------------------------------------------------------------------|---------------------------------------------------------------------------------------------------------------------------------------------------------------|-----------------------|-----------------|
| <b>Brooks, 2005</b>                                             | RCT     | Bangladesh | 2-12 months                                                 | 1621                                          | Zinc supplementation (Efficacy)                                                                                                                                                                        | Syrup: zinc (70mg)                                                                                                                                                                                                                                                                                                  | Weekly for 12 months (endline measurements taken at 10 months to minimize attrition)                                                                          | Placebo               |                 |
| <b>Cardoso, 2016</b><br><br><b>Associated refs: Silva, 2017</b> | Non-RCT | Brazil     | Intervention group: 6-8 months; control group: 10-14 months | 1085                                          | MNP (Efficacy)                                                                                                                                                                                         | 1 sachet: iron (ferrous fumarate) (10mg), zinc (gluconate) (4.1mg), folic acid (150ug), vitamin A (RE) (400ug), vitamin C (30mg), vitamin D3 (5ug), vitamin E (5mg), vitamin B1 (0.5mg), vitamin B2 (0.5mg), vitamin B6 (0.5mg), vitamin B12 (0.9ug), niacin (6mg), copper (0.56mg), iodine (90ug), selenium (17ug) | Flexible use; 2 months supply (60 sachets) over a follow up period of 2-3 months (when intervention group reached the age of the control group at enrollment) | No intervention       |                 |
| <b>Chang, 2010</b>                                              | RCT     | Bangladesh | 6-18 months                                                 | 1000                                          | 1) Daily alternating zinc and placebo supplementation (Efficacy)<br>2) Daily alternating IFA and placebo supplementation (Efficacy)<br>3) Daily alternating MMN and placebo supplementation (Efficacy) | 1) 1 tablet: 10mg zinc<br>2) 1 tablet: 12.5 mg iron and 50IU folic acid<br>2) 1 tablet: 12.5mg iron, 50IU folic acid, 10mg zinc                                                                                                                                                                                     | Daily for 6 months                                                                                                                                            | Placebo               |                 |
| <b>Chen, 2005</b>                                               | cRCT    | China      | ≥3 years (3-6 years subgroup)                               | 14,016 residents ≥3 years of age (9 clusters) | Iron fortified soy sauce (LSFF – efficacy)                                                                                                                                                             | The actual measured iron concentration of the fortified soy sauce was 23 mg/dL (range, 21–25). The average daily soy sauce consumption of the group consuming the fortified product was 16.4 ml per person, which provided 4.9 mg of iron                                                                           | Daily for 18 months                                                                                                                                           | Unfortified soy sauce |                 |
| <b>Chen, 2008</b>                                               | RCT     | China      | 2-6 years                                                   | 282                                           | MNP fortified seasoning                                                                                                                                                                                | 1 sachet: vitamin A (500ug), iron (12mg), thiamine (0.7mg), riboflavin (0.7mg),                                                                                                                                                                                                                                     | 5 days a week for 6 months                                                                                                                                    | Vitamin A fortified   | 1 sachet: 500ug |

|                                                                                           |      |            |                                                     |                                                       |                                                                                                         |                                                                                                                                                                                                                                                                                                                                                                                                                                                                                                                                                                                                                                                                                                                                                                                                              |                                    |                  |  |
|-------------------------------------------------------------------------------------------|------|------------|-----------------------------------------------------|-------------------------------------------------------|---------------------------------------------------------------------------------------------------------|--------------------------------------------------------------------------------------------------------------------------------------------------------------------------------------------------------------------------------------------------------------------------------------------------------------------------------------------------------------------------------------------------------------------------------------------------------------------------------------------------------------------------------------------------------------------------------------------------------------------------------------------------------------------------------------------------------------------------------------------------------------------------------------------------------------|------------------------------------|------------------|--|
| <b>Associated refs: Chen, 2011</b>                                                        |      |            |                                                     |                                                       | powder (Efficacy)                                                                                       | folic acid (0.2mg), niacinamide (7mg), zinc (12mg), calcium (800mg)                                                                                                                                                                                                                                                                                                                                                                                                                                                                                                                                                                                                                                                                                                                                          |                                    | seasoning powder |  |
| <b>Chen, 2013</b><br><br><b>Associated refs: Chen, 2014</b>                               | RCT  | China      | 3-6 years                                           | 445                                                   | 1) Vitamin A supplementation (Efficacy)<br>2) Iron supplementation (Efficacy)                           | 1) 1 capsule: 200,000IU<br>2) 1 tablet: 1-2 mg iron/kg                                                                                                                                                                                                                                                                                                                                                                                                                                                                                                                                                                                                                                                                                                                                                       | 1) 1 dose<br>2) Daily for 6 months | No intervention  |  |
| <b>Christian, 2015</b>                                                                    | cRCT | Bangladesh | 6 months                                            | 5939 (596 clusters)                                   | 1) LNS (Plumpy' doz) (Efficacy)<br>2) MMN fortified wheat soy blend (Targeted fortification – efficacy) | 1) ~23g for children 6-12 months; ~46g for children 12-18 months<br>2) 1 sachet (32g) for children 6-12 months; 2 sachets for children 12-18 months                                                                                                                                                                                                                                                                                                                                                                                                                                                                                                                                                                                                                                                          | Daily for 12 months                | No intervention  |  |
| <b>Dewey, 2017</b><br><br><b>Associated refs: Matias, 2017; Matias, 2018; Ullah, 2019</b> | cRCT | Bangladesh | At birth (supplementation given at 6 months of age) | 3664 children (live births); 4011 women (64 clusters) | 1) LNS (Efficacy and effectiveness)<br>2) MNP (Efficacy)                                                | 1) 20g: energy (118kcal), protein (2.6g), fat (9.6g), linoleic acid (4.46g), $\alpha$ -linolenic acid (0.58g), vitamin A (400ug RE), thiamin (0.5mg), riboflavin (0.5mg), niacin (6mg), folic acid (150ug), pantothenic acid (2mg), vitamin B6 (0.5mg), vitamin B12 (0.9ug), vitamin C (30mg), vitamin D (5ug), vitamin E (6mg), vitamin K (30ug), calcium (280mg), copper (0.34mg), iodine (90ug), iron (9mg), magnesium (40mg), manganese (1.2mg), phosphorus (190mg), potassium (200mg), selenium (20ug), zinc (8mg)<br>2) 1 sachet: vitamin A (400ug RE), thiamin (0.5mg), riboflavin (0.5mg), niacin (6mg), folic acid (150ug), vitamin B6 (0.5mg), vitamin B12 (0.9ug), vitamin C (30mg), vitamin D (5ug), vitamin E (5mg), copper (0.56mg), iodine (90ug), iron (10mg), selenium (17ug), zinc (4.1mg) | Daily for 18 months                | Placebo          |  |

|                                                                                |     |            |                  |                                                 |                                                                          |                                                                                                                                                                                                |                                              |                    |                                                                            |
|--------------------------------------------------------------------------------|-----|------------|------------------|-------------------------------------------------|--------------------------------------------------------------------------|------------------------------------------------------------------------------------------------------------------------------------------------------------------------------------------------|----------------------------------------------|--------------------|----------------------------------------------------------------------------|
| <b>Dibley, 1996</b><br><br><b>Associated refs: Hadi 2000; Hadi 2004</b>        | RCT | Indonesia  | 6-47 months      | 1405; on average 782 participated in each cycle | Vitamin A (and vitamin E) supplementation (Efficacy)                     | Children <12 mos. of age: 1 capsule: 107umol (103,000IU) RE vitamin A and 40umol (17IU) vitamin E; Older participants: 1 capsule: 214umol (206,000IU) RE vitamin A and 84umol (37IU) vitamin E | Every 4 months for 6 cycles                  | Placebo: vitamin E | Children <12 mos. of age: 40umol (17IU); Older participants: 84umol (37IU) |
| <b>Dijkhuizen, 20001</b>                                                       | RCT | Indonesia  | 4 months         | 478                                             | 1) Iron supplementation (Efficacy)<br>2) Zinc supplementation (Efficacy) | 1) Syrup: 10mg<br>2) Syrup: 10mg                                                                                                                                                               | 5 days a week for 6 months                   | Placebo            |                                                                            |
| <b>Domellof, 2001</b><br><br><b>Associated refs: Domellof 2002; Dewey 2002</b> | RCT | Honduras   | 4 months         | 142                                             | Iron supplementation (Efficacy)                                          | Liquid: 1 mg/kg iron - adjusted monthly according to infant weight                                                                                                                             | Daily for 5 months                           | Placebo            |                                                                            |
| <b>Dossa, 2001</b>                                                             | RCT | Benin      | 3-5 years        | 177                                             | Iron supplementation (Efficacy)                                          | elemental iron (60mg)                                                                                                                                                                          | Daily for 3 months                           | Placebo            |                                                                            |
| <b>Drammeh, 2002</b>                                                           | RCT | The Gambia | 2-7 years        | 176                                             | Vitamin A (and vitamin E) supplementation (Efficacy)                     | 1 Capsule: vitamin A (60,000ug) and vitamin E (40mg)                                                                                                                                           | 1 dose at baseline                           | Placebo: vitamin E | 1 capsule: 40mg                                                            |
| <b>Ekvall, 2000</b>                                                            | RCT | Tanzania   | 5 months-3 years | 207                                             | MMN supplementation (Efficacy)                                           | Liquid: vitamin A (1500IU), vitamin D (400IU), vitamin E (5IU), vitamin C (35mg), vitamin B1 (0.5mg), vitamin B2 (0.6mg), niacin (8mg), vitamin B6 (0.4mg), iron (10mg)                        | 3 times a week for 5 months (56 doses total) | Placebo            |                                                                            |
| <b>Ermis, 2002</b>                                                             | RCT | Turkey     | 5 months         | 113                                             | Iron supplementation (Efficacy)                                          | Drops: 1 mg/kg iron - adjusted monthly according to infant weight                                                                                                                              | Daily for 4 months                           | Placebo            |                                                                            |

|                                                                 |      |               |             |                   |                                                                         |                                                                                                                                                                                                                                                                                        |                         |                            |  |
|-----------------------------------------------------------------|------|---------------|-------------|-------------------|-------------------------------------------------------------------------|----------------------------------------------------------------------------------------------------------------------------------------------------------------------------------------------------------------------------------------------------------------------------------------|-------------------------|----------------------------|--|
| <b>Esamai, 2014</b>                                             | RCT  | Kenya         | 5 months    | 45                | MNP (with iron) (Efficacy)                                              | 1 sachet: zinc (5mg), vitamin A (300ug), vitamin C (30mg), folic acid (160ug), iron (12.5mg)                                                                                                                                                                                           | Daily for 3 months      | Placebo                    |  |
| <b>Faber, 2005</b>                                              | RCT  | South Africa  | 6-12 months | 361               | MMN fortified maize porridge (Targeted fortification – efficacy)        | 40g of dry product: β-carotene (3mg), iron (11mg), zinc (3mg), copper (11ug), selenium (10ug), riboflavin (0.4mg), vitamin B6 (0.15mg), vitamin B12 (0.25ug), vitamin E (2.5mg), 2.5 mg vitamin E                                                                                      | Daily for 6 months      | Unfortified maize porridge |  |
| <b>Fahmida, 2007</b>                                            | RCT  | Indonesia     | 3-6 months  | 800               | 1) Zinc supplementation (Efficacy)<br>2) MMN supplementation (Efficacy) | 1) 2mL of syrup: zinc (10mg)<br>2) 2mL of syrup: iron (10mg), zinc (10mg), vitamin A (1000IU)                                                                                                                                                                                          | Daily for 6 months      | Placebo                    |  |
| <b>Fisker, 2013</b><br><br><b>Associated refs: Fisker, 2014</b> | RCT  | Guinea-Bissau | 6-17 months | 7587              | Vitamin A (and vitamin E) supplementation (Efficacy)                    | Per 0.5mL liquid: vitamin A (100,000IU), vitamin E (20IU); per 1mL: vitamin A (200,000IU), vitamin E (40IU);<br>children <1 years of age received 0.5mL;<br>children ≥1 years of age received 1mL                                                                                      | 1 dose at randomization | Placebo                    |  |
| <b>Ghosh, 2019</b>                                              | cRCT | Africa        | 6 months    | 970 (38 clusters) | MNP (Efficacy)                                                          | 1 sachet: vitamin A (200.1ug RE), folic acid (45ug), niacin (3.1mg), riboflavin (0.3mg), thiamin (0.3mg), vit B6 (0.3mg), vit B12 (0.5ug), vit C (30.4mg), Ca (220.3mg), Fe (7mg), P (154.4mg), Zn (2.4mg), choline (62.5mg), vit D (2.5ug), vit E (2.7mg), iodide (0mg), vit K (11ug) | Daily for 12 months     | No intervention            |  |



|                                                                      |      |               |                |                                   |                                                                                                                                                                        |                                                                                                                            |                            |                 |  |
|----------------------------------------------------------------------|------|---------------|----------------|-----------------------------------|------------------------------------------------------------------------------------------------------------------------------------------------------------------------|----------------------------------------------------------------------------------------------------------------------------|----------------------------|-----------------|--|
| <b>Giovanni, 2006</b><br><br><b>Associated refs: Agnostoni, 2007</b> | RCT  | Cambodia      | 6 months       | 204                               | MNP (Efficacy)                                                                                                                                                         | 1 sachet: fe (fumarate) (12.5mg), Zn (5mg), vitamin C (50mg), vitamin A (300mcg), vitamin D3 (7.5mcg), folic acid (150mcg) | Daily for 12 months        | Placebo         |  |
| <b>Glinz, 2015</b><br><br><b>Associated refs: Glinz, 2017</b>        | cRCT | Cote d'Ivoire | 12-36 months   | 629 (40 clusters)                 | Iron fortified maize and soy-based porridge<br>1) with ferrous fumarate<br>2) ferrous pyrophosphate;<br>We combined groups 1 and 2 (Targeted fortification – efficacy) | 25g dry weight: iron as NaFeDTA (2mg), iron as ferrous fumarate or ferric pyrophosphate (3.8mg), and native iron (0.6mg)   | 6 days a week for 9 months | No intervention |  |
| <b>Gokay, 2012</b>                                                   | RCT  | India         | 6 months       | 120                               | Iron supplementation (Efficacy)                                                                                                                                        | 1mg/kg                                                                                                                     | Daily for 6 months         | No intervention |  |
| <b>Gupta, 2003</b>                                                   | RCT  |               | 6-41 months    | 280                               | Zinc supplementation (Efficacy)                                                                                                                                        | 5mL syrup: elemental zinc (10mg)                                                                                           | 5 days a week for 16 weeks | Placebo         |  |
| <b>Gupta, 2007</b>                                                   | RCT  | India         | 6-48 months    | 1878                              | Zinc supplementation (Efficacy)                                                                                                                                        | 5mL syrup: zinc (25mg)                                                                                                     | Weekly for 6 months        | Placebo         |  |
| <b>Hamadani, 2001</b><br><br><b>Associated refs: Osendarp, 2002</b>  | RCT  | Bangladesh    | 1 month        | 301                               | Zinc supplementation (Efficacy)                                                                                                                                        | Syrup: elemental zinc (5mg)                                                                                                | Daily for 5 months         | Placebo         |  |
| <b>Hess, 2015a</b><br><br><b>Associated refs:</b>                    | cRCT | Burkina Faso  | 8.8-9.9 months | 3220 (2390 concessions/ clusters) | 1) LNS 5mg zinc + placebo (LNS-Zn5)                                                                                                                                    | 1-2) 20g: energy (118kcal), protein (2.6g), fat (9.6g), vit A (400mg), B1 (0.3mg), B2 (0.4mg), B3 (4mg), B5                | Daily for 9 months         | No intervention |  |

|                                                            |      |          |              |                                                    |                                                                                |                                                                                                                                                                                                                                        |                                                                                                                                                    |                 |  |
|------------------------------------------------------------|------|----------|--------------|----------------------------------------------------|--------------------------------------------------------------------------------|----------------------------------------------------------------------------------------------------------------------------------------------------------------------------------------------------------------------------------------|----------------------------------------------------------------------------------------------------------------------------------------------------|-----------------|--|
| <b>Abbeddou, 2015; Hess 2015b; Prado 2016c; Some, 2015</b> |      |          |              |                                                    | 2) LNS 10mg zinc + placebo (LNS-Zn10)<br>We combined groups 1 and 2 (Efficacy) | (1.8mg), B6 (0.3mg), B12 (0.5mg), folic acid (80mg), vit C (30mg), vit D (5mg), vit E (6mg), vit K (30mg), Ca (280mg), copper (0.34mg), I (90mg), Fe (6mg), Mg (40mg), Mn (1.2mg), P (190mg), K (200mg), Se (20mcg), Zinc (5, or 10mg) |                                                                                                                                                    |                 |  |
| <b>Huybregts, 2012</b>                                     | cRCT | Chad     | 6-36 months  | 1038 (14 clusters)                                 | LNS (Plumpy'Doz) (Efficacy and effectiveness)                                  | 46g (247 kcal/day)                                                                                                                                                                                                                     | Daily for 4 months                                                                                                                                 | No intervention |  |
| <b>Jack, 2012</b>                                          | cRCT | Cambodia | 6-7 months   | 3112 (20 clusters);<br>1350 recruited to subsample | MNP (Efficacy)                                                                 | 1 sachet: Iron (12.5mg), zinc gluconate (10mg), vit A (300mcg), iodine (90mcg), vit B1 (0.5mg), vit B2 (0.5mg), B6 (0.5mg), B12 (0.9mcg), niacin (6mg), folic acid (160mcg), vit C (30mg), copper (0.3mg), vit D (5mcg), vit E (6IU)   | Daily for 6 months                                                                                                                                 | No intervention |  |
| <b>Kemmer, 2012</b>                                        | RCT  | Honduras | 6-60 months  | 199                                                | MNP (Efficacy)                                                                 | 1 sachet: iron (12.5mg), zinc (5mg), folic acid (150ug), vitamin A (1600IU), vitamin C (50mg), and vitamin D (300IU)                                                                                                                   | Daily for 4 months                                                                                                                                 | No intervention |  |
| <b>Kikafunda, 1998</b>                                     | RCT  | Uganda   | 30-89 months | 155                                                | Zinc supplementation (Efficacy)                                                | 1 tablet: zinc (10mg)                                                                                                                                                                                                                  | 5 days a week (Monday to Friday) for 6 months (2 supplementation phases lasting 3 months each with a 2 month break in between due to school break) | Placebo         |  |

|                         |      |                                            |                                                     |                     |                                                                                                                    |                                                                                                                                                                                                                                                                                                                                                                                                                                                                                                                                                                                                                                                   |                                                                                                                         |                                                                              |  |
|-------------------------|------|--------------------------------------------|-----------------------------------------------------|---------------------|--------------------------------------------------------------------------------------------------------------------|---------------------------------------------------------------------------------------------------------------------------------------------------------------------------------------------------------------------------------------------------------------------------------------------------------------------------------------------------------------------------------------------------------------------------------------------------------------------------------------------------------------------------------------------------------------------------------------------------------------------------------------------------|-------------------------------------------------------------------------------------------------------------------------|------------------------------------------------------------------------------|--|
| <b>Kounnavong, 2011</b> | RCT  | Lao People's Democratic Republic (Lao PDR) | 6-52 months                                         | 336                 | MNP (Efficacy)                                                                                                     | 1 sachet: vitamin A (RE 400ug), vitamin D3 (5ug), vitamin E (TE 5mg), vitamin B1, B2, B6 each (0.5mg), folic acid (150ug), niacin (6mg), vitamin B12 (0.9ug), vitamin C (30mg), iron (10mg), zinc (4.1mg), selenium (17ug), copper (0.56mg), and iodine (90ug)                                                                                                                                                                                                                                                                                                                                                                                    | Daily for 24 weeks                                                                                                      | Standard of care                                                             |  |
| <b>Larson, 2018</b>     | cRCT | India                                      | 6-18 months                                         | 10,000 (90clusters) | MNP (Efficacy and effectiveness)                                                                                   | 1 sachet: iron (Ferrous Fumarate) 12.5 mg Zinc (Zinc Gluconate) 5 mg Folic Acid 0.160 mg Vitamin-A (Vit-A Acetate) 0.30 mg Vitamin-C (Ascorbic Acid) 30 mg Vitamin-B12 0.9 mcg Iodine 90 mcg                                                                                                                                                                                                                                                                                                                                                                                                                                                      | Daily; baseline and endline surveys conducted on August to September 2014 and from February to March 2016, respectively | No intervention                                                              |  |
| <b>Lartey, 1999</b>     | RCT  | Ghana                                      | <1 month (supplementation given at 6 months of age) | 208                 | MMN fortified Weanimix (cereal-legume blend of maize, soybeans and groundnuts) (Targeted fortification – efficacy) | High: consuming > 60g or low: consuming ≤ 60g: energy (4350kcal), protein (150g), fat (114g), calcium (high 17360mg, low 8950mg), iron (high 366mg, low 183mg), zinc (high 171mg, low 86mg), copper (high 25mg, low 13mg), magnesium (1400mg), potassium (high 18960mg, low 12310mg), sodium (30mg), phosphorus (high 17900mg, low 9400mg), ascorbic acid (high 781mg, low 391mg), niacin (high 29mg, low 149mg), pyridoxine (high 31.3mg, low 17.4mg), riboflavin (high 19.5mg, low 9.8mg), thiamine (high 22.1mg, low 13.5mg), vitamin B-12 (high 7ug, low 35ug), folic acid (high 5470ug, low 3070ug), vitamin A (high 18360 RE, low 9360 RE)) | Daily for 6 months                                                                                                      | Unfortified Weanimix (cereal-legume blend of maize, soybeans and groundnuts) |  |

|                                                                         |      |           |              |                                                     |                                                                                                       |                                                                                                                                                                                                                                                                                                                   |                                                     |                                                                                   |                                                                                                                                                                                                                                                                   |
|-------------------------------------------------------------------------|------|-----------|--------------|-----------------------------------------------------|-------------------------------------------------------------------------------------------------------|-------------------------------------------------------------------------------------------------------------------------------------------------------------------------------------------------------------------------------------------------------------------------------------------------------------------|-----------------------------------------------------|-----------------------------------------------------------------------------------|-------------------------------------------------------------------------------------------------------------------------------------------------------------------------------------------------------------------------------------------------------------------|
| <b>Le, 2005</b>                                                         | RCT  | Vietnam   | 6-12 months  | 346                                                 | 1) MMN supplementation (Efficacy)<br>2) Iron supplementation (Efficacy)                               | 1) 1 tablet: vitamin A (375ug RE/1250IU), vitamin D (5ug), vitamin E (6mg), vitamin K (10ug), vitamin C (35mg), vitamin B1 (0.5mg), vitamin B2 (0.5mg), vitamin B6 (0.5mg), vitamin B12 (0.9ug), niacin (6mg), folate (150ug), iron (10mg), zinc (5mg), copper (0.6mg), iodine (59ug)<br>2) 1 tablet: iron (10mg) | Daily for 6 months (both intervention arms)         | Placebo                                                                           |                                                                                                                                                                                                                                                                   |
| <b>Le Port 2017</b>                                                     | cRCT | Senegal   | 24-59 months | 462 children from 310 households (247 concessions ) | MMN fortified yoghurt (traditional Senegalese yoghurt mixed with millet) (LSFF – efficacy)            | 80g sachet: iron-EDTA (2.1mg), zinc (2.25mg), iodine (24ug), vitamin A (120ug)                                                                                                                                                                                                                                    | Daily for 11 months                                 | No intervention                                                                   |                                                                                                                                                                                                                                                                   |
| <b>Lind, 2003</b><br><br><b>Associated refs: Lind, 2004; Lind, 2008</b> | RCT  | Indonesia | ≤6 months    | 680                                                 | 1) Iron supplementation (Efficacy)<br>2) Zinc supplementation (Efficacy)                              | 1) 1.6mL of syrup: iron (10mg) as ferrous sulphate<br>2) 1.6 mL of syrup: zinc (10mg) as zinc sulphate                                                                                                                                                                                                            | Daily for 6 months                                  | Placebo                                                                           |                                                                                                                                                                                                                                                                   |
| <b>Lo, 2011</b>                                                         | RCT  | Senegal   | 9-17 months  | 137                                                 | Iron fortified maize and millet-based porridge and MMN supplement (Targeted fortification – efficacy) | 25g: per kg dry weight of complementary food: iron as ferrous fumarate (60mg), zinc as zinc oxide (240mg); Per 5mL of MMN supplement: thiamine (0.2mg), riboflavin (0.2mg), niacin (2mg), vitamin B6 (0.2mg), vitamin B12 (0.3ug), pantothenic acid (0.7mg), biotin (2.6mg), vitamin C (5mg)                      | Daily for 15 days                                   | Iron fortified maize and millet-based porridge, and MMN (without zinc) supplement | 25kg: per kg dry weight of complementary food: iron as ferrous fumarate (60mg); Per 5mL of MMN supplement: thiamine (0.2mg), riboflavin (0.2mg), niacin (2mg), vitamin B6 (0.2mg), vitamin B12 (0.3ug), pantothenic acid (0.7mg), biotin (2.6mg), vitamin C (5mg) |
| <b>Long, 2006</b><br><br><b>Associated refs: Rosado, 2009</b>           | RCT  | Mexico    | 6-15 months  | 786                                                 | 1) Vitamin A supplementation (Efficacy)<br>2) Zinc supplementation (Efficacy)                         | 1) 5mL of liquid: retinol (20,000IU) for children ≤1 years of age or 45,000IU for children >1 years of age<br>2) 5mL of liquid: zinc as zinc methionine (20mg)                                                                                                                                                    | 1) Every 2 months for a year<br>2) Daily for a year | Placebo                                                                           |                                                                                                                                                                                                                                                                   |
| <b>Long, 2007</b>                                                       | RCT  | Mexico    | 6-15 months  | 195                                                 | Vitamin A supplementation (Efficacy)                                                                  | 5 mL of liquid: retinol (20,000IU) for children ≤1 years of age or 45,000IU for children >1 years of age                                                                                                                                                                                                          | Every 2 months for 15 months                        | Placebo                                                                           |                                                                                                                                                                                                                                                                   |

|                                                                         |                               |            |                                                            |                                                                     |                                                                         |                                                                                                                                                                                                                                                                                                                                                                                                                                               |                                             |                  |  |
|-------------------------------------------------------------------------|-------------------------------|------------|------------------------------------------------------------|---------------------------------------------------------------------|-------------------------------------------------------------------------|-----------------------------------------------------------------------------------------------------------------------------------------------------------------------------------------------------------------------------------------------------------------------------------------------------------------------------------------------------------------------------------------------------------------------------------------------|---------------------------------------------|------------------|--|
| <b>Lopez, 2005</b>                                                      | RCT                           | Peru       | 6-12 months                                                | 313                                                                 | 1) MMN supplementation (Efficacy)<br>2) Iron supplementation (Efficacy) | 1) 1 foodlet: 1 RDA: vitamin A as retinyl acetate (375ug RE), vitamin D (5ug), vitamin E (6mg), vitamin K (10ug), vitamin C (35mg), vitamin B1 (0.5mg), vitamin B2 (0.5mg), vitamin B6 (0.5mg), vitamin B-12 (0.9ug) , niacin (6mg), folate (150ug), iron as ferrous fumarate (10mg), zinc as zinc gluconate (5mg), copper as cupric gluconate (0.6mg), and iodine as potassium iodide (50ug)<br>3) 1 foodlet: iron as ferrous sulfate (10mg) | Daily for 6 months (both intervention arms) | Placebo          |  |
| <b>Lopez, 2014</b>                                                      | Controlled before-after study | Nicaragua  | Anemia sample: 0-60 months; cognitive sample: 30-60 months | 57 in the anemia sample and 1047 in the cognitive assessment sample | MNP (Effectiveness)                                                     | 1 sachet: six micronutrients (Sprinkles) were administered as per World Health Organization (WHO)/Sprinkles Global Health Initiative (SPGH) protocol                                                                                                                                                                                                                                                                                          | Daily for 2 months                          | No intervention  |  |
| <b>Lozoff, 1996</b>                                                     | RCT                           | Costa Rica | 12-23 months                                               | 87 (32 ID anemic infants, 54 non-anemic infants)                    | Iron supplementation (Efficacy)                                         | Drops: 3mg/kg                                                                                                                                                                                                                                                                                                                                                                                                                                 | Twice daily for 6 months                    | Placebo          |  |
| <b>Lozoff, 2016</b><br><br><b>Associated refs: Angulo-Barroso, 2016</b> | RCT                           | China      | At birth (supplementation at 6 weeks of age)               | 1482 infants; 2371 mothers                                          | Iron supplementation (Efficacy)                                         | Liquid: ~1mg/kg of elemental iron. Each mL contained 2.7 mg elemental iron. To simplify dosing, the volume was 2 mL/d for infants aged <6 mos. and 3 mL/d for infants aged ≥6 mos.                                                                                                                                                                                                                                                            | Daily for ~7.5 months                       | Placebo          |  |
| <b>Luby, 2018</b><br><br><b>Associated refs: Tofail, 2018</b>           | cRCT                          | Bangladesh | Supplementation given at 6 months                          | 720 clusters                                                        | LNS (Efficacy and effectiveness)                                        | 2 x 10 g sachets: 118 Kcal, 9.6 g of fat, 2.6 g of protein, 12 vitamins and 10 minerals                                                                                                                                                                                                                                                                                                                                                       | Daily for 18 months                         | No intervention  |  |
| <b>Lucia, 2017</b>                                                      | cRCT                          | Brazil     | 2-6 years                                                  | 112                                                                 | MMN fortified rice (LSFF – efficacy)                                    | 50g rice portion containing 0.5 g of UR: iron (4.2mg), zinc (2.1mg), thiamine (vitamin B1) (0.36mg), folic acid (72mg).                                                                                                                                                                                                                                                                                                                       | 5 days a week for 4 months                  | Unfortified rice |  |

|                                                                                   |      |                              |                |                     |                                                               |                                                                                                                                                                                                                                                                                                                                                                      |                     |                               |     |
|-----------------------------------------------------------------------------------|------|------------------------------|----------------|---------------------|---------------------------------------------------------------|----------------------------------------------------------------------------------------------------------------------------------------------------------------------------------------------------------------------------------------------------------------------------------------------------------------------------------------------------------------------|---------------------|-------------------------------|-----|
| <b>Lundeen, 2010</b>                                                              | cRCT | Kyrgyz Republic (Kyrgyzstan) | 6-36 months    | 2193 (24 clusters)  | MNP (Efficacy)                                                | 1 sachet: elemental iron as microencapsulated ferrous fumarate (12.5mg), vitamin A as retinol acetate (300ug), zinc as zinc gluconate (5mg), vitamin C as ascorbic acid (30mg), and folic acid (160ug)                                                                                                                                                               | Daily for 2 months  | No intervention               |     |
| <b>Luo, 2017</b>                                                                  | cRCT | China                        | 6-11 months    | 1802 (351 clusters) | MNP (Efficacy and effectiveness)                              | 1 sachet: Iron (ferrous lactate) (6.0mg), zinc (zinc sulfate) (4.80mg), vitamin A (200µgRE), vitamin C (50.0mg), vitamin D (5.0µg), vitamin E (1.55mg), vitamin B1 (0.30mg), vitamin B2 (0.50mg), vitamin B6 (0.30mg), vitamin B12 (0.5µg), folic acid (66µg), niacin (3.0mg)                                                                                        | Daily for 18 months | No intervention               |     |
| <b>Ma, 2016</b><br><br><b>Associated refs: Sheng, 2019</b>                        | cRCT | China                        | 6 months       | 1465                | MMN fortified rice cereal (Targeted fortification – efficacy) | 20g: iron (1.10 mg), zinc and vitamin B 12                                                                                                                                                                                                                                                                                                                           | Daily for 12 months | Unfortified local rice cereal | 20g |
| <b>Macharia-Mutie, 2012</b>                                                       | RCT  | Kenya                        | 12-59 months   | 279                 | MNP (Efficacy)                                                | 1 sachet: retinyl palmitate (100µg RE), cholecalciferol (5µg), 1-α tocopheryl acetate (5mg TE), phyloquinone (30µg), thiamin (0.5mg), riboflavin (0.5mg), pyridoxine (0.5mg), folic acid (90µg), niacin (6mg), vitamin B12 (0.9µg), vitamin C (60mg), iron as NaFeDTA (2.5mg), zinc (2.5mg), selenium (17µg), copper (0.34mg), iodine (30µg)                         | Daily for 16 weeks  | Unfortified maize porridge    |     |
| <b>Maleta, 2015</b><br><br><b>Associated refs: Bendaadenda 2016; Prado, 2016d</b> | RCT  | Malawi                       | 5.5-6.5 months | 1932                | LNS (Efficacy)                                                | 20g: energy (490kJ), protein (2.5g), fat (9.5g), linoleic acid (4.44g), alpha-linolenic acid (0.58g), phytate (56mg), vitamin A (400ug RE), vitamin C (30mg), thiamin (0.3mg), riboflavin (0.4mg), niacin (4mg), folic acid (80ug), pantothenic acid (1.8mg), vitamin B6 (0.3mg), vitamin B12 (0.5ug), vitamin D (5ug), vitamin E (6mg), vitamin K (30ug), Fe (6mg), | Daily for 12 months | No intervention               |     |

|                                                                                   |     |           |                |      |                                                                         |                                                                                                                                                                                                                                                                                                                                                                                                                        |                     |                 |  |
|-----------------------------------------------------------------------------------|-----|-----------|----------------|------|-------------------------------------------------------------------------|------------------------------------------------------------------------------------------------------------------------------------------------------------------------------------------------------------------------------------------------------------------------------------------------------------------------------------------------------------------------------------------------------------------------|---------------------|-----------------|--|
|                                                                                   |     |           |                |      |                                                                         | Zn (8mg), Cu (0.34mg), Ca (240mg), P (208mg), K (265mg), Mg (50mg), Se (20ug), iodine (90ug), Mn (1.2mg)                                                                                                                                                                                                                                                                                                               |                     |                 |  |
| <b>Malik, 2013</b><br><br><b>Associated refs: Malik, 2014</b>                     | RCT | India     | 6-11 months    | 272  | Zinc supplementation (Efficacy)                                         | 5ml of syrup: zinc as zinc sulfate (20mg)                                                                                                                                                                                                                                                                                                                                                                              | Daily for 2 weeks   | Placebo         |  |
| <b>Mangani, 2014</b><br><br><b>Associated refs: Mangani, 2014b; Mangani, 2015</b> | RCT | Malawi    | 5.5-6.5 months | 840  | LNS (with milk protein base) (Efficacy)                                 | 54g: energy (285kcal), protein (8.2g), fat (17.9g), retinol (400ug RE), folate (160ug), niacin (6mg), pantothenic acid (2mg), riboflavin (0.5mg), thiamin (0.5mg), vitamin B6 (0.5mg), vitamin B12 (0.9ug), vitamin C (30mg), vitamin D (5ug), calcium (366mg), copper (0.4mg), iodine (90ug), iron (6mg), magnesium (78.5mg), selenium (20ug), zinc (6.0mg), phosphorus (186mg), potassium (319mg), manganese (0.6mg) | Daily for 12 months | No intervention |  |
| <b>Massaga, 2003</b>                                                              | RCT | Tanzania  | 12-16 weeks    | 291  | Iron supplementation (Efficacy)                                         | 2.5mL of liquid: iron as ferric ammonium citrate mixture (3mg elemental iron/mL)                                                                                                                                                                                                                                                                                                                                       | Daily for 6 months  | Placebo         |  |
| <b>Mazariegos, 2010</b>                                                           | RCT | Guatemala | 6-11 months    | 412  | Zinc supplementation (Efficacy)                                         | Half a tablet: zinc (5mg)                                                                                                                                                                                                                                                                                                                                                                                              | Daily for 6 months  | Placebo         |  |
| <b>McDonald, 2015</b><br><br><b>Associated refs: Carter, 2018; Locks, 2016</b>    | RCT | Tanzania  | 5-7 weeks      | 2400 | 1) MMN supplementation (Efficacy)<br>2) Zinc supplementation (Efficacy) | 1 capsule: vitamin C (60mg), vitamin E (8mg), vitamin B1 (0.5mg), vitamin B2 (0.6mg), niacin (4mg), vitamin B6 (0.6mg), folate (130ug), vitamin B12 (1ug), zinc (5mg)<br>2)1 capsule: zinc (5mg)<br>1 capsule through 6 months of age, and 2 capsules from 7 months of age to end of follow-up                                                                                                                         | Daily for 18 months | Placebo         |  |

|                                                                                    |         |              |             |                                                   |                                                                                                                                      |                                                                                                                                                                                                       |                            |                           |  |
|------------------------------------------------------------------------------------|---------|--------------|-------------|---------------------------------------------------|--------------------------------------------------------------------------------------------------------------------------------------|-------------------------------------------------------------------------------------------------------------------------------------------------------------------------------------------------------|----------------------------|---------------------------|--|
| <b>Menendez, 1997</b><br><br><b>Associated refs:<br/>Menendez, 2004</b>            | RCT     | Tanzania     | 8 weeks     | 832                                               | Iron supplementation (Efficacy)                                                                                                      | 2mg/kg; we assumed average body weight of 6kg, therefore children received 2.4 mL of ferrous glycine sulphate containing 5 mg of ferrous sulfate per 5 mL                                             | Daily for 4 months         | Placebo                   |  |
| <b>Menon, 2007</b>                                                                 | cRCT    | Haiti        | 9-24 months | 425 (10 clusters)                                 | MNP (to be added in wheat soy blend) (Efficacy and effectiveness)                                                                    | 1 sachet MMN: iron (12.5mg), zinc (5mg) , vitamin A (400ug), folic acid (160ug) and vitamin C (30mg)                                                                                                  | Daily for 2 months         | Fortified wheat soy blend |  |
| <b>Monteiro, 2001</b>                                                              | Non-RCT | Brazil       | 6-59 months | 1134                                              | Iron supplementation (Efficacy)                                                                                                      | Children 6-9 months old (30mg of elemental iron), children 10 to 17 months old (40mg), children 18 to 29 months old (50mg), children 30 to 35 months old (60mg), children 36 to 59 months old (80mg). | Weekly for ~7 months       | No intervention           |  |
| <b>Muller, 2001</b><br><br><b>Associated refs:<br/>Garenne, 2007; Muller, 2003</b> | RCT     | Burkina Faso | 6-31 months | 709                                               | Zinc supplementation (Efficacy)                                                                                                      | 1 tablet: zinc (12.5mg)                                                                                                                                                                               | 6 days a week for 6 months | Placebo                   |  |
| <b>Nagpal, 2004</b>                                                                | RCT     | India        | 4-6 months  | 100                                               | Iron supplementation (Efficacy)                                                                                                      | Drops: 2mg/kg                                                                                                                                                                                         | Daily for 2 months         | Placebo                   |  |
| <b>Nestel, 2004</b>                                                                | cRCT    | Sri Lanka    | 9\71 months | 3228 in total: 745 preschoolers (9-71 months old) | 1) Reduced iron fortified wheat flour<br>2) Electrolytic iron fortified wheat flour;<br>We combined groups 1 and 2 (LSFF – efficacy) | 1) 66ppm; analysis of iron content: $76 \pm 6.6\text{mg/kg}$<br>2) 66ppm; analysis of iron content: $78 \pm 15.2\text{mg/kg}$                                                                         | 24 months                  | Unfortified wheat flour   |  |
| <b>Nguyen, 2002</b>                                                                | cRCT    | Vietnam      | 5-12 months | 280                                               | Iron supplementation (Efficacy)                                                                                                      | 2.5mL of syrup: elemental iron (15mg)                                                                                                                                                                 | Daily for 3 months         | Placebo                   |  |



|                              |      |              |                                          |              |                                                                     |                                                                                                                                                                                                                                                                                                                                                                                                                                                                       |                                                                                                                                               |                                                            |     |
|------------------------------|------|--------------|------------------------------------------|--------------|---------------------------------------------------------------------|-----------------------------------------------------------------------------------------------------------------------------------------------------------------------------------------------------------------------------------------------------------------------------------------------------------------------------------------------------------------------------------------------------------------------------------------------------------------------|-----------------------------------------------------------------------------------------------------------------------------------------------|------------------------------------------------------------|-----|
| <b>Northrop-Clewes, 1996</b> | RCT  | Pakistan     | <2 years                                 | 268          | Iron supplementation (Efficacy)                                     | Liquid: iron (15mg) as ferrous sulfate                                                                                                                                                                                                                                                                                                                                                                                                                                | Daily for 12 weeks                                                                                                                            | Placebo                                                    |     |
| <b>Null, 2018</b>            | cRCT | Kenya        | Supplementation given at 6 months of age | 762 clusters | LNS (Efficacy and effectiveness)                                    | 2 x 10 g sachets of SQ LNS (to be mixed with food): provided 118 kcal per day and 12 essential vitamins and 10 minerals                                                                                                                                                                                                                                                                                                                                               | Daily for 18 months                                                                                                                           | No intervention                                            |     |
| <b>Oelofse, 2003</b>         | RCT  | South Africa | 6-12 months                              | 60           | MMN fortified cereal (porridge) (Targeted fortification – efficacy) | 60g of dry cereal: energy (1304 kJ), protein (12g), fat (6g), carbohydrates (54.8g), vitamin A (1200IU), vitamin C (40mg), vitamin B1 (0.64mg), vitamin B2, (0.24mg), niacin (3.2mg), calcium (368mg), iron (8mg), vitamin D (160IU), vitamin E (4 IU), biotin (20ug), folic acid (17.6ug), pantothenic acid (0.6mg), vitamin B12 (0.6ug), vitamin B6 (0.24mg), phosphorous (232mg), iodine (26ug), zinc (5.6mg), potassium (632mg), sodium (272mg), chloride (440mg) | Daily for 6 months                                                                                                                            | Normal diet                                                |     |
| <b>Ogunlade, 2011</b>        | RCT  | South Africa | 36-79 months                             | 151          | MNP in stiff maize porridge (Efficacy)                              | 35g porridge and MNP: iron (2.86mg), zinc (2.86mg), iodine (34.3ug), calcium (457mg), vitamin A (457 RE), vitamin C (68.6mg), vitamin E (5.71mg), vitamin B12 (1.03ug), thiamine (0.57mg), niacin (6.86mg), riboflavin (0.57mg), folate (103ug), and vitamin B6 (0.57mg).                                                                                                                                                                                             | 5 days a week for 11 weeks                                                                                                                    | Soft maize-meal porridge plus placebo (maize maltodextrin) | 28g |
| <b>Osei, 2015</b>            | cRCT | Nepal        | 6-9 months                               | 335          | MNP and enhanced homestead food production program (Efficacy)       | 10 mg iron (encapsulated ferrous fumarate), 4.1 mg zinc (zinc gluconate), 90 g iodine (potassium iodide), 400 g vitamin A (vitamin A acetate), 150 g folic acid, 0.5 mg vitamin B1 (thiamine mononitrate), 0.5 mg vitamin B2 (riboflavin), 0.5 mg vitamin B6 (pyridoxine), 0.9 g vitamin B12                                                                                                                                                                          | 60 sachets were provided within a 6-month period (twice, for a total of 11 months) and participants were instructed to feed MNP on any day of | Enhanced homestead food production program                 |     |

|                                                                     |      |           |                      |     |                                                                                                                                                                                        |                                                                                                                                                                                                                                                                                                                                                                                                                                                                                                                                                                                                                                                                     |                                                                           |                                                        |  |
|---------------------------------------------------------------------|------|-----------|----------------------|-----|----------------------------------------------------------------------------------------------------------------------------------------------------------------------------------------|---------------------------------------------------------------------------------------------------------------------------------------------------------------------------------------------------------------------------------------------------------------------------------------------------------------------------------------------------------------------------------------------------------------------------------------------------------------------------------------------------------------------------------------------------------------------------------------------------------------------------------------------------------------------|---------------------------------------------------------------------------|--------------------------------------------------------|--|
|                                                                     |      |           |                      |     |                                                                                                                                                                                        | (cyanocobalamin), 30 mg vitamin C (ascorbic acid), 5 g vitamin D3 (cholecalciferol), 5 mg vitamin E (vitamin E acetate), 6 mg niacin (niacinamide) and 0.6 mg copper (cupric gluconate)                                                                                                                                                                                                                                                                                                                                                                                                                                                                             | their preference, but to ensure not to feed more than one sachet per day. |                                                        |  |
| <b>Owino, 2007</b>                                                  | RCT  | Zambia    | 6 or 8 months of age | 185 | Fortified blend of maize, beans, Bambara nuts, and groundnuts (Targeted fortification – efficacy)                                                                                      | Vitamin A 700 ug, vitamin C 200 mg, vitamin D 10 ug, thiamine 0.9 mg, riboflavin 1.0 mg, pyridoxine 860 ug, folate 220 ug, pantothenic acid 4 mg, calcium 700 mg, phosphorus 550 mg, magnesium 100 mg, electrolytic iron 41.8 mg, zinc oxide 400 mg, copper 400 ug, manganese 1200 ug, selenium 20 ug                                                                                                                                                                                                                                                                                                                                                               | Daily for 3 months                                                        | No intervention                                        |  |
| <b>Palupi, 1997</b>                                                 | RCT  | Indonesia | 2-5 years            | 299 | Iron supplementation (Efficacy)                                                                                                                                                        | 30g                                                                                                                                                                                                                                                                                                                                                                                                                                                                                                                                                                                                                                                                 | Weekly for 9 weeks                                                        | Placebo                                                |  |
| <b>Phu, 2010</b><br><br><b>Associated refs:</b><br><b>Phu, 2012</b> | cRCT | Vietnam   | 5 months             | 426 | 1) Fortified instant flour made into energy-dense gruel<br>2) Fortified food complement made into energy-dense gruel<br>We combined groups 1 and 2 (Targeted fortification – efficacy) | 1) Raw protein (3.9g), digestible protein (3.6g), lipids (2.24g), vitamin A (38ug RE), ascorbic acid (20mg), thiamin (68ug), riboflavin (95ug), nicotinamide (368ug), folic acid (12ug), pantothenic acid (330ug), vitamin B12 (0.06ug), vitamin B6 (53ug), vitamin K1 (8.4ug), vitamin D (117IU), sodium (73mg), potassium (143mg), chlorine (121mg), calcium (138mg), phosphorus (117mg), magnesium (21.5mg), iron (7.6mg), zinc (1.7mg), iodine (5.1ug), copper (92ug), manganese (319ug), selenium (2.1ug)<br>2) raw protein (9.7g), digestible protein (8.8g), lipids (5.3g), vitamin A (154ug RE), ascorbic acid (87mg), thiamin (229ug), riboflavin (309ug), | Daily for 6 months                                                        | Usual care (traditional gruel made at home by parents) |  |

|                                                                                    |     |             |              |     |                                                                               |                                                                                                                                                                                                                                                                                                                                                             |                                                                         |                                 |                                    |
|------------------------------------------------------------------------------------|-----|-------------|--------------|-----|-------------------------------------------------------------------------------|-------------------------------------------------------------------------------------------------------------------------------------------------------------------------------------------------------------------------------------------------------------------------------------------------------------------------------------------------------------|-------------------------------------------------------------------------|---------------------------------|------------------------------------|
|                                                                                    |     |             |              |     |                                                                               | nicotinamide (535ug), folic acid (46ug), pantothenic acid (904ug), vitamin B12 (0.16ug), vitamin B6 (98ug), vitamin K1 (38ug), vitamin D (516IU), sodium (343mg), potassium (512mg), chlorine (553mg), calcium (710mg), phosphorus (473mg), magnesium (61mg), iron (33mg), zinc (5.9mg), iodine (22ug), copper (284ug), manganese (942ug), selenium (4.5ug) |                                                                         |                                 |                                    |
| <b>Radhakrishna, 2013</b>                                                          | RCT | India       | 4 months     | 324 | Zinc (and riboflavin) supplementation (Efficacy)                              | 0.5mL of syrup: zinc (5mg) as zinc sulfate, riboflavin (0.5mg)                                                                                                                                                                                                                                                                                              | Daily for 14 months (effective duration 12 months)                      | Placebo (and riboflavin)        | 0.5mL of syrup: riboflavin (0.5mg) |
| <b>Rahman, 1996</b><br><br><b>Associated refs: Mahalanabis, 1997; Rahman, 1998</b> | RCT | Bangladesh  | 6-17 weeks   | 165 | Vitamin A supplementation (Efficacy)                                          | 15mg                                                                                                                                                                                                                                                                                                                                                        | 3 doses at DPT/oral polio (OPV) immunizations (baseline, 4 and 8 weeks) | Placebo                         |                                    |
| <b>Rahman, 2001</b><br><br><b>Associated refs: Rahman, 2002a; Rahman, 2002b</b>    | RCT | Bangladesh  | 12-35 months | 800 | Zinc supplementation and 1 placebo capsule on day 14 (Efficacy)               | 5mL of syrup: (20mg) elemental zinc                                                                                                                                                                                                                                                                                                                         | Daily for 14 days                                                       | Placebo                         |                                    |
| <b>Rim, 2008</b>                                                                   | RCT | North Korea | 6-12 month   | 234 | MNP with iron (to be used for home fortification in rice porridge) (Efficacy) | Elemental iron (10mg)                                                                                                                                                                                                                                                                                                                                       | 6 days per week for 6 months                                            | Placebo fortified rice porridge |                                    |
| <b>Rivera, 2001</b><br><br><b>Associated refs:</b>                                 | RCT | Mexico      | 8-14 months  | 337 | MMN supplementation (Efficacy)                                                | 25mL of liquid: 1 Recommended Dietary Allowance (RDA) for children age 1-3 y of vitamins D, E, K, niacin, B-1, B-6,                                                                                                                                                                                                                                         | 6 days a week for 12 months                                             | Placebo                         |                                    |

|                                                                                                          |                         |        |                             |                                       |                                                                          |                                                                                                                                                                                                                                                                                                                          |                                            |                                         |  |
|----------------------------------------------------------------------------------------------------------|-------------------------|--------|-----------------------------|---------------------------------------|--------------------------------------------------------------------------|--------------------------------------------------------------------------------------------------------------------------------------------------------------------------------------------------------------------------------------------------------------------------------------------------------------------------|--------------------------------------------|-----------------------------------------|--|
| <b>Rivera, 2001;<br/>Rosado, 1999</b>                                                                    |                         |        |                             |                                       |                                                                          | folic acid, pantothenic acid, iodine, copper, manganese fluoride and selenium; 1.2 RDA of vitamin A; and 1.5 RDA of ascorbic acid, riboflavin, vitamin B-12, iron and zinc                                                                                                                                               |                                            |                                         |  |
| <b>Rivera, 2010</b>                                                                                      | cRCT                    | Mexico | 12-30 months                | 795 (12 clusters)                     | Iron fortified milk (LSFF – efficacy)                                    | Per unit/400mL reconstituted milk (48g powdered milk in 400mL of water): energy (236.8kcal), protein (12.4g), fat (12.4g), carbohydrates (18.6g), sodium (178mg), iron (5.28mg), zinc (5.28mg) vitamin A (216ug), vitamin D (1.8ug), vitamin C (48.0mg), vitamin B12 (0.44ug), folic acid (32.1ug), riboflavin (0.52mg). | Daily for 12 months                        | Unfortified whole milk (as milk powder) |  |
| <b>Rosado, 1997</b><br><br><b>Associated refs:<br/>Allen, 2000;<br/>Munoz, 2000;<br/>Rosado 1999</b>     | RCT                     | Mexico | 18-36 months                | 219                                   | 1) Iron supplementation (Efficacy)<br>2) Zinc supplementation (Efficacy) | 1) 20mL of syrup: 20mg<br>2) 20mL of syrup: 20mg                                                                                                                                                                                                                                                                         | 6 days per week for 12 months              | Placebo                                 |  |
| <b>Rosado, 2011</b>                                                                                      | RCT                     | Mexico | 12-24 months                | 224                                   | LNS (Oportunidades food supplement) (Efficacy and effectiveness)         | 44g: energy (194kcal), protein (5.8g), fat (6.6g), carbohydrates (27.9g), Na (24.5mg), Fe (10mg), zinc (10mg), vitamin A (400ug), vitamin E (6mg), vitamin C (40mg), vitamin B12 (0.7ug), folic acid (50ug), riboflavin (0.8mg)                                                                                          | Daily for 6 months                         | Placebo                                 |  |
| <b>Ross, 1995</b><br><br><b>Associated refs:<br/>Binka, 1995<br/>Dollimore, 1997;<br/>Kirkwood, 1996</b> | Survival study:<br>cRCT | Ghana  | Survival study: 6-90 months | Survival study: 21,906 (185 clusters) | Vitamin A supplementation (Efficacy)                                     | 30mg retinol equivalents (RE) for children 6-11 mos, (100,000IU); 60mg RE for children aged 12+ mos. (200,000IU)                                                                                                                                                                                                         | Survival study: every 4 months for 2 years | Placebo                                 |  |

|                                                                                 |                               |          |             |                    |                                                                                                              |                                                                                                                                                                                                                                                                                                                                                                                                                                                                                                                                                      |                                                               |                           |  |
|---------------------------------------------------------------------------------|-------------------------------|----------|-------------|--------------------|--------------------------------------------------------------------------------------------------------------|------------------------------------------------------------------------------------------------------------------------------------------------------------------------------------------------------------------------------------------------------------------------------------------------------------------------------------------------------------------------------------------------------------------------------------------------------------------------------------------------------------------------------------------------------|---------------------------------------------------------------|---------------------------|--|
| <b>Samuel, 2018</b>                                                             | Controlled before-after study | Ethiopia | 6-11 months | 2356 (9 districts) | MNP (to be used with complementary food) (Efficacy and effectiveness)                                        | 1 sachet: vit A (400mcg), vit D (5mcg), vit E (5mg TE), vit B1 (0.5mg), vit B2 (0.5mg), vit B6 (0.5mg), vit B12 (0.9mcg), niacin (6mg), folate (150mcg), vit C (30mg), iron (6mg), zinc (4.1mg), copper (0.56 mg), selenium (17mcg), iodine (90mcg)                                                                                                                                                                                                                                                                                                  | Every other day for 37 weeks                                  | No intervention           |  |
| <b>Sazawal, 2006</b><br><br><b>Associated refs: Olney, 2006; Sazawal, 2007b</b> | RCT                           | Tanzania | 1-35 months | 32,155             | 1) MMN supplementation (Efficacy)<br>2) IFA supplementation (Efficacy)<br>3) Zinc supplementation (Efficacy) | 1) 1 tablet: iron (12.5mg), folic acid (50ug), and zinc (10mg). months received half a tablet.<br>2) 1 tablet: iron (12.5mg), folic acid (50ug)<br>3) 1 tablet: zinc (10mg)<br>Children aged 12 months or older received 1 tablet daily while children under 2                                                                                                                                                                                                                                                                                       | Daily until stopping of the trial (max duration of 18 months) | Placebo                   |  |
| <b>Sazawal, 2007a</b><br><br><b>Associated refs: Sazawal, 2010</b>              | RCT                           | India    | 1-3 years   | 663                | MMN fortified powdered milk (LSFF – efficacy)                                                                | Per 3 servings: energy (1890kJ), protein (20.1g), taurine (48mg), carbohydrates (48.9g), fat (18.9g), vitamin A (330ug), vitamin D3 (3.6ug), vitamin E (8.1mg), vitamin C (48mg), thiamin (0.6mg), riboflavin (1.8mg), niacin (4.5mg), vitamin B6 (0.6mg), pantothenic acid (2.7mg), folate (114ug), vitamin B12 (2.7ug), biotin (24.9ug), choline (114mg), calcium (720mg), phosphorus (600mg), magnesium (84mg), iron (9.6mg), zinc (9.6mg), iodine (36ug), selenium (6.6ug), copper (0.3mg), sodium (360mg), potassium (1260mg), chloride (900mg) | 3 sachets daily for 12 months                                 | Unfortified powdered milk |  |
| <b>Sazawal, 2014</b>                                                            | cRCT                          | India    | 6-24 months | 292 (12 clusters)  | 1) MNP (Efficacy)<br>2) Rice-based fortified complementary food (Targeted fortification – efficacy)          | 1) 1 sachet (1.5g) for children >1 year and half a sachet for children <1 year. Per 1.5g sachet: vitamin A (978.26ug), thiamine (0.98mg), riboflavin (1.11mg), niacin (13.04mg), pyridoxine (1.3mg),                                                                                                                                                                                                                                                                                                                                                 | Daily for 6 months                                            | No intervention           |  |

|                          |     |           |              |     |                                                                                                  |                                                                                                                                                                                                                                                                                                                                                                                                                                                                                                                                                                                                                                                                                                                                                                                                                                                                                                                             |                     |                                 |                                                                                                                                                                                   |
|--------------------------|-----|-----------|--------------|-----|--------------------------------------------------------------------------------------------------|-----------------------------------------------------------------------------------------------------------------------------------------------------------------------------------------------------------------------------------------------------------------------------------------------------------------------------------------------------------------------------------------------------------------------------------------------------------------------------------------------------------------------------------------------------------------------------------------------------------------------------------------------------------------------------------------------------------------------------------------------------------------------------------------------------------------------------------------------------------------------------------------------------------------------------|---------------------|---------------------------------|-----------------------------------------------------------------------------------------------------------------------------------------------------------------------------------|
|                          |     |           |              |     |                                                                                                  | <p>cyanocobalamin (3.91ug), biotin (19.57ug), folic acid (260.87ug), vitamin C (39.13mg), vitamin D (6.52ug), vitamin E (9.78ug), calcium (494.02mg), magnesium (69.13mg), phosphorus (81.52mg), iron (12.5mg), zinc (10mg), copper (1.3mg), manganese (2.58mg), pantothenic acid (6.52mg)</p> <p>2) 20g sachet for children &lt;1 year and 40g sachet for children &gt;1 year of age, to be reconstituted in water or milk to make 100 or 200ml, in addition to normal diet. Per 20g (100mL mix): energy (80.4kcal), protein (3.0g), fat (1.5g), linoleate (0.18g), vitamin A (1800IU), thiamine (0.51mg), riboflavin (0.58mg), niacin (6.6mg), pyridoxine (0.83mg), cyanocobalamin (0.21mg), biotin (0.11mg), folic acid (0.144mg), vitamin C (23.4mg), vitamin D (145IU), vitamin E (10.5IU), calcium (138.7mg), magnesium (20mg), phosphorus (64mg), iron (7.9mg), zinc (6.5mg), copper (1.0mg), manganese (0.16mg)</p> |                     |                                 |                                                                                                                                                                                   |
| <b>Semba, 2000</b>       | RCT | Indonesia | 3-6 years    | 236 | Vitamin A supplementation (Efficacy)                                                             | 60mg RE                                                                                                                                                                                                                                                                                                                                                                                                                                                                                                                                                                                                                                                                                                                                                                                                                                                                                                                     | 1 dose              | Placebo                         |                                                                                                                                                                                   |
| <b>Sempertegui, 1999</b> | RCT | Ecuador   | 6-36 months  | 400 | Vitamin A supplementation (Efficacy)                                                             | 0.2mL of syrup: 10,000 IU of vitamin A (3000ug of retinol)                                                                                                                                                                                                                                                                                                                                                                                                                                                                                                                                                                                                                                                                                                                                                                                                                                                                  | Weekly for 40 weeks | Placebo                         |                                                                                                                                                                                   |
| <b>Shamah-Levy, 2008</b> | RCT | Mexico    | 12-30 months | 486 | 1) Fortified complementary food based on powdered milk (Nutrisano) with iron as ferrous sulphate | Per portion (44g powder): energy (194kcal), protein (5.8g), carbohydrates (27.9g), fat (6.6g), iron as ferrous sulphate or gluconate (10mg), zinc as zinc oxide (10mg), vitamin A as retinol palmitate                                                                                                                                                                                                                                                                                                                                                                                                                                                                                                                                                                                                                                                                                                                      | Daily for 6 months  | Complementary food without iron | Per portion (44g powder): energy (194kcal), protein (5.8g), carbohydrates (27.9g), fat (6.6g), zinc as zinc oxide (10mg), vitamin A as retinol palmitate (400ug RE), vitamin E as |

|                        |      |                  |              |                                      |                                                                                                                                                |                                                                                                                                                                                                                                                                      |                              |                                               |                                                                                                                                               |
|------------------------|------|------------------|--------------|--------------------------------------|------------------------------------------------------------------------------------------------------------------------------------------------|----------------------------------------------------------------------------------------------------------------------------------------------------------------------------------------------------------------------------------------------------------------------|------------------------------|-----------------------------------------------|-----------------------------------------------------------------------------------------------------------------------------------------------|
|                        |      |                  |              |                                      | 2) fortified complementary food as above, but with iron as ferrous gluconate<br>We combined groups 1 and 2 (Targeted fortification – efficacy) | (400ug RE), vitamin E as tocopherol acetate (6mg), vitamin C as ascorbic acid (49.9mg), riboflavin (0.8mg), vitamin B12 as cyanocobalamin (0.7ug), folic acid (0.05mg)                                                                                               |                              |                                               | tocopherol acetate (6mg), vitamin C as ascorbic acid (49.9mg), riboflavin (0.8mg), vitamin B12 as cyanocobalamin (0.7ug), folic acid (0.05mg) |
| <b>Shankar, 1999</b>   | RCT  | Papua New Guinea | 6-60 months  | 480                                  | Vitamin A (and vitamin E) supplementation (Efficacy)                                                                                           | 1 capsule for children aged 12 months and above and half a capsule for children below 12 months of age. 1 capsule: vitamin A (200,000IU), vitamin E (10ug)                                                                                                           | Every 3 months for 13 months | Placebo                                       |                                                                                                                                               |
| <b>Sharieff, 2006</b>  | cRCT | China            | 3-6 years    | 415 (16 clusters)                    | MNP (Efficacy)                                                                                                                                 | 1 sachet: iron as encapsulated ferrous fumarate (30mg), zinc gluconate (5mg), vitamin C (50mg), vitamin A (300ug), vitamin D3 (7.5ug) and folic acid (150ug) mixed with semi-solid meal of rice porridge or congee                                                   | Daily for 13 weeks           | No intervention (children were served congee) |                                                                                                                                               |
| <b>Sharma, 2011</b>    | cRCT | India            | 6-36 months  | 158 (5 clusters)                     | IFA supplementation (Efficacy)                                                                                                                 | 1 tablet: elemental iron (19.8mg)                                                                                                                                                                                                                                    | Daily for 60 days            | No intervention                               |                                                                                                                                               |
| <b>Siega-Riz, 2014</b> | cRCT | Honduras         | 6-18 months  | 300 mother-child pairs (18 clusters) | LNS (Plumpy'Doz) (Efficacy)                                                                                                                    | 46.3g: energy (247kcal), protein (5.9g), fat (16g), vitamin A (400ug), vitamin B12 (0.9ug), iron (9mg), zinc (9mg)                                                                                                                                                   | Daily for 12 months          | No intervention                               |                                                                                                                                               |
| <b>Silva, 2006</b>     | RCT  | Brazil           | 12-59 months | 60                                   | Zinc supplementation (Efficacy)                                                                                                                | 5mL of syrup: zinc (10mg) as zinc sulfate                                                                                                                                                                                                                            | Daily for 4 months           | Placebo                                       |                                                                                                                                               |
| <b>Smuts, 2005</b>     | RCT  | South Africa     | 6-12 months  | 265                                  | 1) MMN supplementation (Efficacy)<br>2) Iron supplementation (Efficacy)                                                                        | 1) 1 tablet: 1recommended daily allowance (RDA): vitamin A (400ug RE), folic acid (150ug), vitamin D3 (5ug), iodine (90ug), Se (17ug), vitamin B12 (0.9ug), niacin (6mg), Fe (10mg), Zn (4.1mg), Cu (0.56mg), thiamin (0.5mg), riboflavin (0.5mg), vitamin C (30mg), | Daily for 6 months           | Placebo                                       |                                                                                                                                               |

|                                                                       |      |              |             |                     |                                  |                                                                                                                                                                                                                                                                                                                                                                                                                                                                                                                 |                     |                 |  |
|-----------------------------------------------------------------------|------|--------------|-------------|---------------------|----------------------------------|-----------------------------------------------------------------------------------------------------------------------------------------------------------------------------------------------------------------------------------------------------------------------------------------------------------------------------------------------------------------------------------------------------------------------------------------------------------------------------------------------------------------|---------------------|-----------------|--|
|                                                                       |      |              |             |                     |                                  | vitamin B6 (0.5mg), vitamin E (5mg)<br>2) 1 tablet: iron (10mg)                                                                                                                                                                                                                                                                                                                                                                                                                                                 |                     |                 |  |
| <b>Smuts, 2019</b>                                                    | RCT  | South Africa | 6 months    | 750                 | LNS (Efficacy)                   | 20g: energy (114kcal), protein (3g), fat (8g), linoleic acid (1.5g), alpha-linolenic acid (265mg), linoleic acid: alpha linolenic acid (5.7g), vitamin A (200ug), vitamin D 92.5ug), vitamin E (2.5mg), vitamin K (7.5ug), thiamine (0.25mg), riboflavin (0.25mg), niacin (3mg), pantothenate (1mg), vitamin B6 (0.25mg), biotin (4ug), folate (80ug), vitamin B12 (0.45ug), vitamin C (23.3mg), calcium (250mg), iodine (45ug), iron (5.8mg), zinc (6.2mg), copper (0.28mg), selenium (8.5ug), choline (2.0mg) | Daily for 6 months  | No intervention |  |
| <b>Somasse, 2018</b>                                                  | cRCT | Mali         | 6-23 months | 722 (40 clusters)   | MNP (Efficacy and effectiveness) | 1 sachet: vitamin A (400ug RE), folic acid (150ug), vitamin D3 (5ug), iodine (90ug), Se (17ug), vitamin B12 (0.9ug), niacin (6mg), Fe (10mg), Zn (4.1mg), Cu (0.56mg), thiamin (0.5mg), riboflavin (0.5mg), vitamin C (30mg), vitamin B6 (0.5mg), vitamin E (5mg)                                                                                                                                                                                                                                               | Daily for 3 months  | No intervention |  |
| <b>Soofi, 2013</b><br><br><b>Associated refs: Ariff, 2014</b>         | cRCT | Pakistan     | <5 months   | 2746 (256 clusters) | MNP (Efficacy)                   | 1 sachet: iron (12.5mg), vitamin C (50mg), vitamin A (300ug), vitamin D (5ug), and folic acid (150ug) and zinc (10mg)                                                                                                                                                                                                                                                                                                                                                                                           | Daily for 12 months | No intervention |  |
| <b>Stoltzfus, 2001</b><br><br><b>Associated refs: Stoltzfus, 2004</b> | RCT  | Tanzania     | 5-59 months | 684                 | Iron supplementation (Efficacy)  | 0.mL of syrup: 10mg iron as ferrous sulphate                                                                                                                                                                                                                                                                                                                                                                                                                                                                    | Daily for 12 months | Placebo         |  |



|                                                                                                                                       |      |           |              |        |                                                                                                              |                                                                                                                                                                                                                                                                                           |                                   |         |  |
|---------------------------------------------------------------------------------------------------------------------------------------|------|-----------|--------------|--------|--------------------------------------------------------------------------------------------------------------|-------------------------------------------------------------------------------------------------------------------------------------------------------------------------------------------------------------------------------------------------------------------------------------------|-----------------------------------|---------|--|
| <b>Suchdev, 2012</b>                                                                                                                  | cRCT | Kenya     | 6-35 months  | 1063   | MNP (Efficacy and effectiveness)                                                                             | 1 sachet: 12.5 mg Fe as microencapsulated ferrous fumarate, 375 ug vitamin A, 5 mg Zn, 150 ug folic acid; 35 mg vitamin C, 5 ug vitamin D3, 6 mg vitamin E, 6 mg niacin; 0.6 mg Cu, 50 ug iodine, 0.5 mg thiamine, riboflavin, and vitamin B-6, and 0.9 mg vitamin B-12                   | 12 months                         | Placebo |  |
| <b>Surono, 2014</b>                                                                                                                   | RCT  | Indonesia | 12-24 months | 48     | Zinc supplementation (Efficacy)                                                                              | 20mg as zinc sulfate monohydrate= 8mg zinc elemental                                                                                                                                                                                                                                      | Daily for 90 days                 | Placebo |  |
| <b>Thu, 1999</b>                                                                                                                      | RCT  | Vietnam   | 6-24 months  | 168    | MMN supplementation (Efficacy)                                                                               | 1mL of syrup: retinol as retinyl acetate (333ug), iron (8mg), zinc (5mg), vitamin C (20mg)                                                                                                                                                                                                | 5 days per week for 12 weeks      | Placebo |  |
| <b>Tielsch, 2006</b><br><br>Associated refs: Christian, 2011; Katz, 2010; Murray-Kolb, 2012; Surkan, 2012; Surkan, 2013 Tielsch, 2007 | cRCT | Nepal     | 1-35 months  | 43,124 | 1) IFA supplementation (Efficacy)<br>2) MMN supplementation (Efficacy)<br>3) Zinc supplementation (efficacy) | 1) 1 tablet: iron (12.5mg), folic acid (50ug) (half a tablet if <1-year-old)<br>2) 1 tablet: iron (12.5mg), folic acid (50ug), zinc (10mg) (half a tablet if <1-year-old)<br>3) 1 tablet: zinc (10mg) tablet (half a tablet if <1-year-old)                                               | Enrollment until 36 months of age | Placebo |  |
| <b>Umeta, 2000</b><br><br>Associated refs: Umeta, 2003                                                                                | RCT  | Ethiopia  | 6-12 months  | 200    | Zinc supplementation (Efficacy)                                                                              | 3mL of syrup: zinc as zinc sulphate (10mg)                                                                                                                                                                                                                                                | 6 days a week for 6 months        | Placebo |  |
| <b>Untoro, 2005</b><br><br>Associated refs: Wijaya-Erhardt, 2007                                                                      | RCT  | Indonesia | 6-12 months  | 284    | 1) MMN supplementation (Efficacy)<br>2) Iron supplementation (Efficacy)                                      | 1) 1 foodlet: 1 RDA: vitamin A as retinyl acetate (375ug RE), vitamin D (5ug), vitamin E (6mg $\alpha$ -tocopherol equivalents), vitamin K (10ug), vitamin C (35mg), thiamine (0.5mg), riboflavin (0.5mg), vitamin B-6 (0.5mg), vitamin B-12 (0.9ug) , niacin as niacinamide (6mg),folate | Daily for 23 weeks                | Placebo |  |

|                                                                           |      |              |              |                   |                                                                                                               |                                                                                                                                                                                                                                                                                                                      |                            |                                               |  |
|---------------------------------------------------------------------------|------|--------------|--------------|-------------------|---------------------------------------------------------------------------------------------------------------|----------------------------------------------------------------------------------------------------------------------------------------------------------------------------------------------------------------------------------------------------------------------------------------------------------------------|----------------------------|-----------------------------------------------|--|
|                                                                           |      |              |              |                   |                                                                                                               | (150ug), iron as ferrous fumarate (10mg), zinc as zinc gluconate (5mg), copper as cupric gluconate (0.6mg), and iodine as potassium iodide (59ug)<br>2) Iron as ferrous sulfate (10mg)                                                                                                                               |                            |                                               |  |
| <b>Varma, 2007</b>                                                        | cRCT | India        | 36-66 months | 684 (30 clusters) | MNP (to be mixed with local khichdi) (Efficacy)                                                               | 200g of khichdi: ferrous fumarate (14mg), vitamin A retinyl acetate (500IU), folic acid (0.05mg)                                                                                                                                                                                                                     | 6 days a week for 24 weeks | Unfortified khichdi with placebo premix       |  |
| <b>Vijay, 2014</b>                                                        | cRCT | India        | 6-36 months  | 1294              | MNP (to be mixed with supplementary baby mix) (Efficacy)                                                      | 1 sachet: 12mg ferrous fumarate, 300ug vitamin A (retinyl acetate), 5mg zinc oxide, 30mg vitamin C, 50ug folic acid and dextrose                                                                                                                                                                                     | 5 days a week for 6 months | Supplementary baby mix                        |  |
| <b>Villalpando, 2006</b>                                                  | RCT  | Mexico       | 10-30 months | 130               | MMN fortified milk (LSFF – efficacy)                                                                          | 400 mL per day. Per unit/400mL reconstituted milk (48g powdered milk in 400mL of water): energy (992kJ), protein (12.5g), fat (12.5g), carbohydrates (18.7g), iron as ferrous gluconate (5.28mg), zinc as zinc oxide (5.28mg), retinol palmitate (21.6ug), vitamin C as sodium ascorbate (48mg), folic acid (32.1ug) | Daily for 6 months         | Unfortified cow's whole milk (as milk powder) |  |
| <b>Wasantwisut, 2006</b><br><br><b>Associated refs: Pongcharoen, 2011</b> | RCT  | Thailand     | 4-6 months   | 674               | 1) Iron supplementation (Efficacy)<br>2) Zinc supplementation (Efficacy)                                      | 1) 2mL of syrup: zinc (10mg)<br>2) 2mL of syrup: zinc (10mg)                                                                                                                                                                                                                                                         | Daily for 6 months         | Placebo                                       |  |
| <b>Wessells, 2012</b>                                                     | RCT  | Burkina Faso | 6-23 months  | 451               | 1) Zinc (liquid) supplementation<br>2) Zinc (tablet) supplementation<br>We combined groups 1 and 2 (Efficacy) | 1) 5 mL: zinc as zinc sulfate (5mg)<br>2) 1 tablet: zinc as zinc sulfate (5mg)                                                                                                                                                                                                                                       | Daily for 3 weeks          | Placebo                                       |  |

|                                                                                   |      |           |             |                   |                                                                          |                                                                                                                                                 |                              |                 |  |
|-----------------------------------------------------------------------------------|------|-----------|-------------|-------------------|--------------------------------------------------------------------------|-------------------------------------------------------------------------------------------------------------------------------------------------|------------------------------|-----------------|--|
| <b>West, 1995</b><br><br><b>Associated refs:<br/>Bishai, 2005;<br/>Katz, 1995</b> | cRCT | Nepal     | 6-72 months | 11918 (261 wards) | Vitamin A (and vitamin E) supplementation (Efficacy)                     | 30000ug RE (100,000IU) for children 6-11 months old and 60000ug RE (200,000IU) for children 12 months or older; vitamin E (40IU) as antioxidant | Every 4 months for 12 months | Placebo         |  |
| <b>Wieringa, 2003</b>                                                             | RCT  | Indonesia | 4 months    | 387               | 1) Iron supplementation (Efficacy)<br>2) Zinc supplementation (Efficacy) | 1) 2mL of syrup: 10mg iron (ferrous sulfate)<br>2) 12mL of syrup: 10mg zinc (zinc sulfate)                                                      | 5 days a week for 6 months   | Placebo         |  |
| <b>Yurdakok, 2004</b>                                                             | RCT  | Turkey    | 4 months    | 79                | Iron supplementation (Efficacy)                                          | 1 mg/kg iron - adjusted monthly according to infant weight                                                                                      | Daily for 3 months           | No intervention |  |
| <b>Zlotkin, 2003</b>                                                              | RCT  | Ghana     | 8-20 months | 437               | MNP (with iron only) (Efficacy)                                          | 40mg                                                                                                                                            | Daily for 6 months           | Placebo         |  |

## Appendix 4 – Additional Forest Plots

### Comparison 1: Vitamin A Supplementation vs. Placebo/No Intervention (Efficacy)

#### All-cause mortality (incidence)

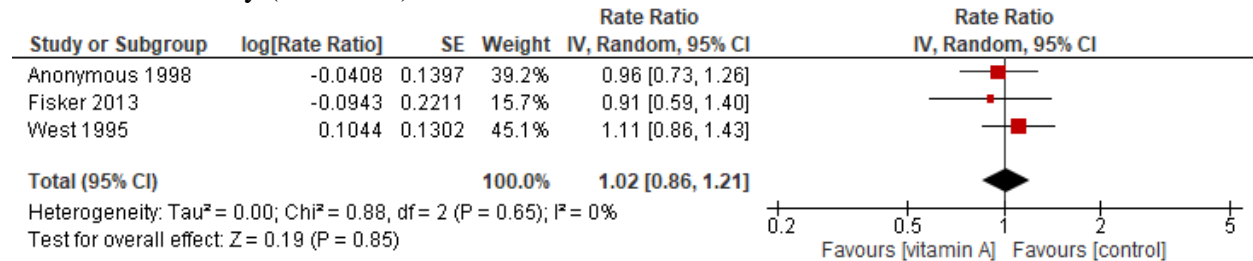

#### All-cause mortality (cumulative incidence)

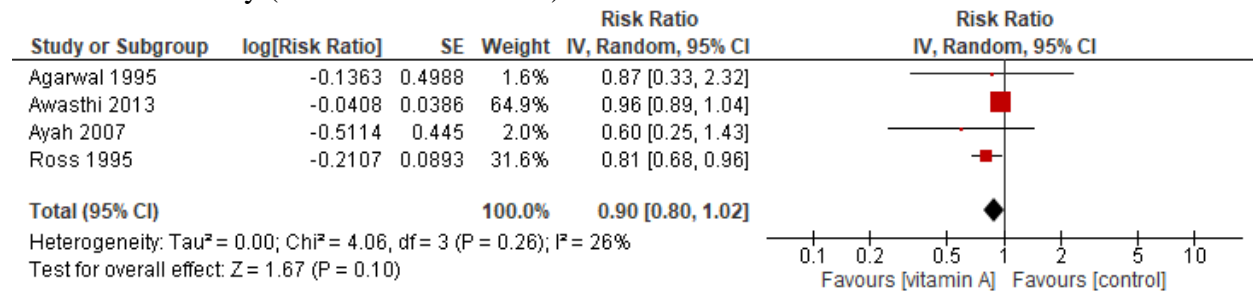

#### Serum/plasma retinol ( $\mu\text{mol/L}$ )

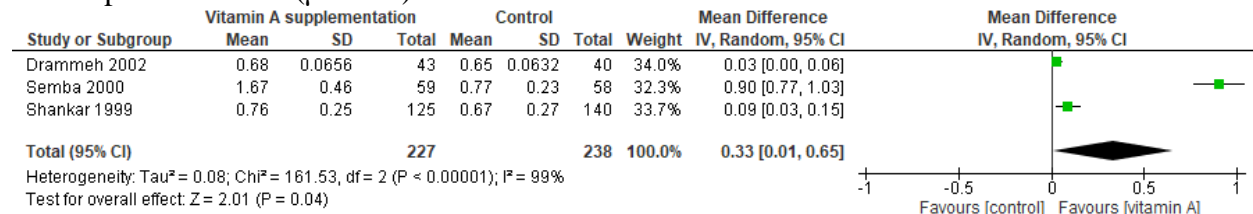

#### Diarrhea (incidence)

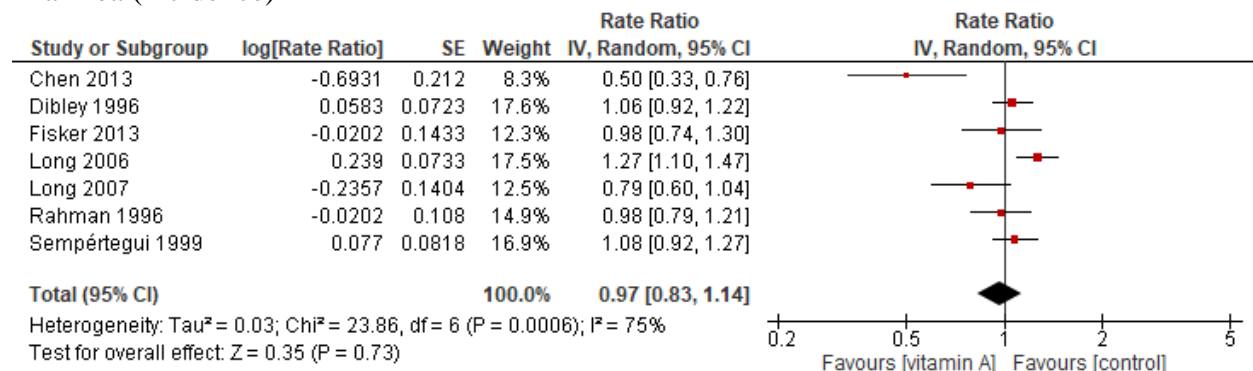

## Lower respiratory tract infection (incidence)

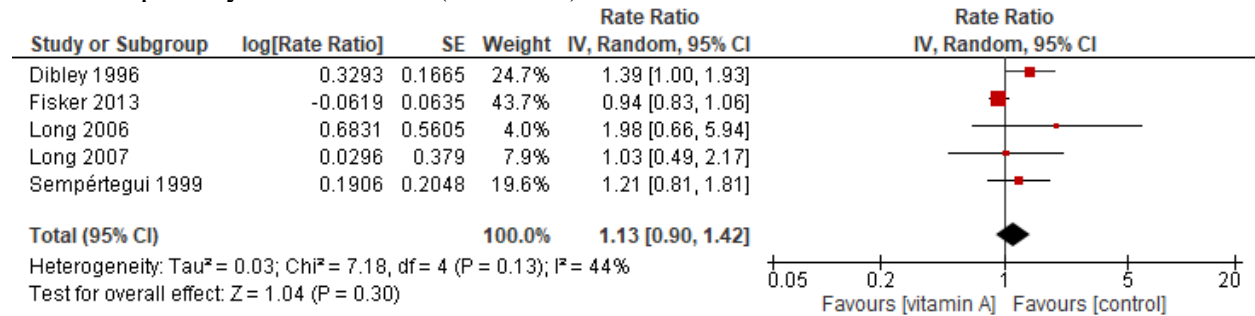

## Comparison 2: Zinc Supplementation vs. Placebo/No Intervention (Efficacy)

### All-cause mortality (incidence)

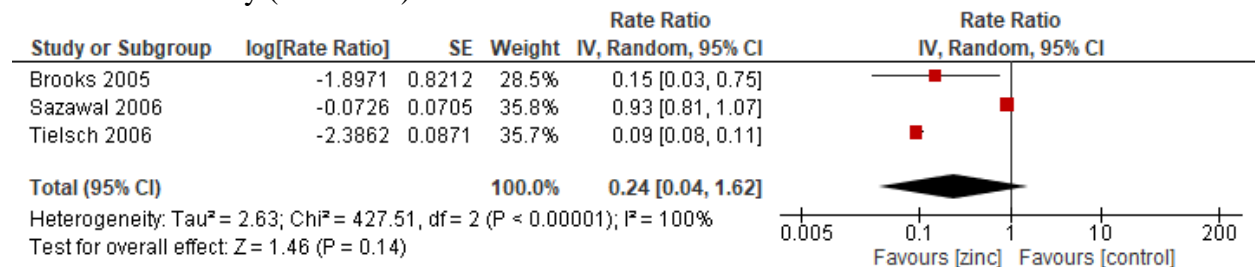

### Anemia

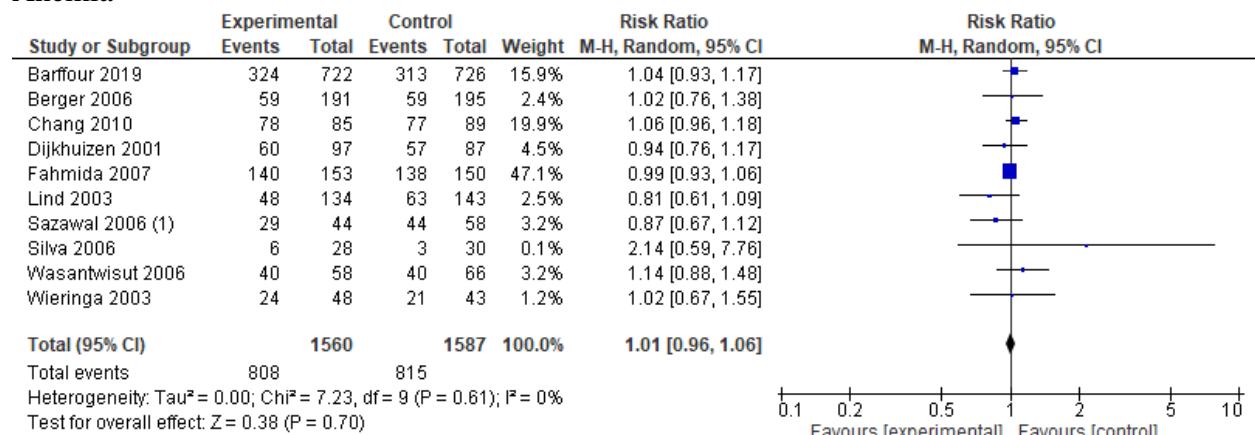

#### Footnotes

(1) hemoglobin concentration  $<100$  g/L

### Stunting

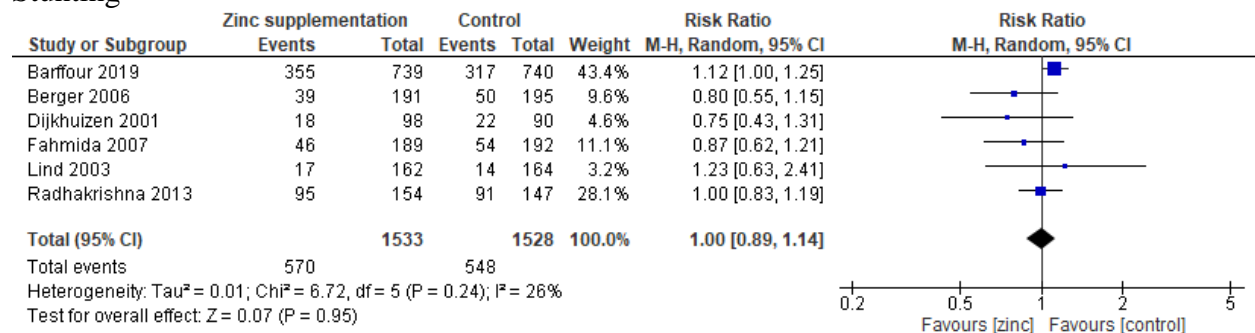

## Wasting

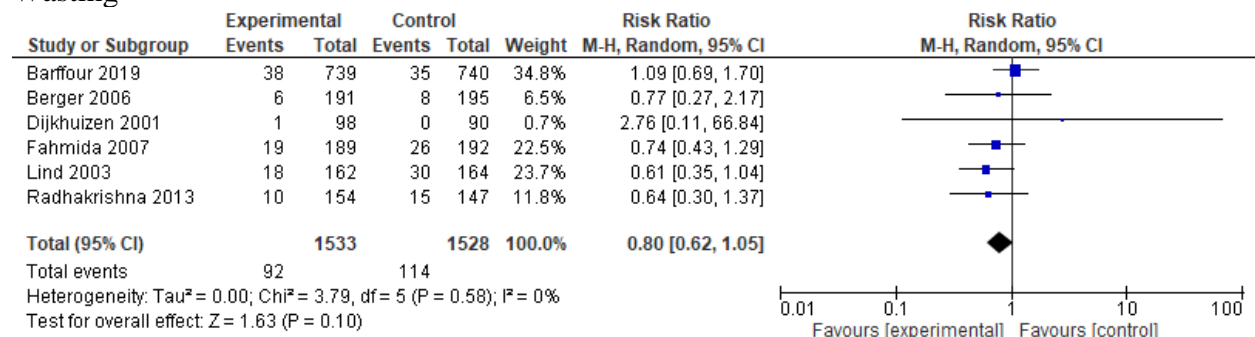

## Underweight

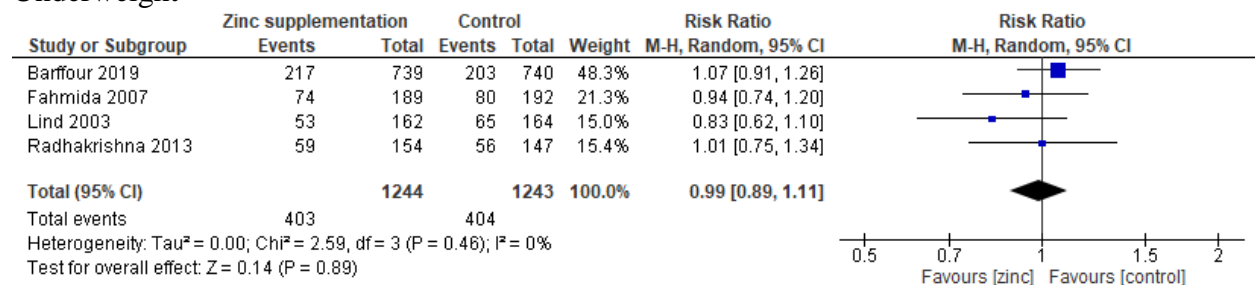

## Height (cm)

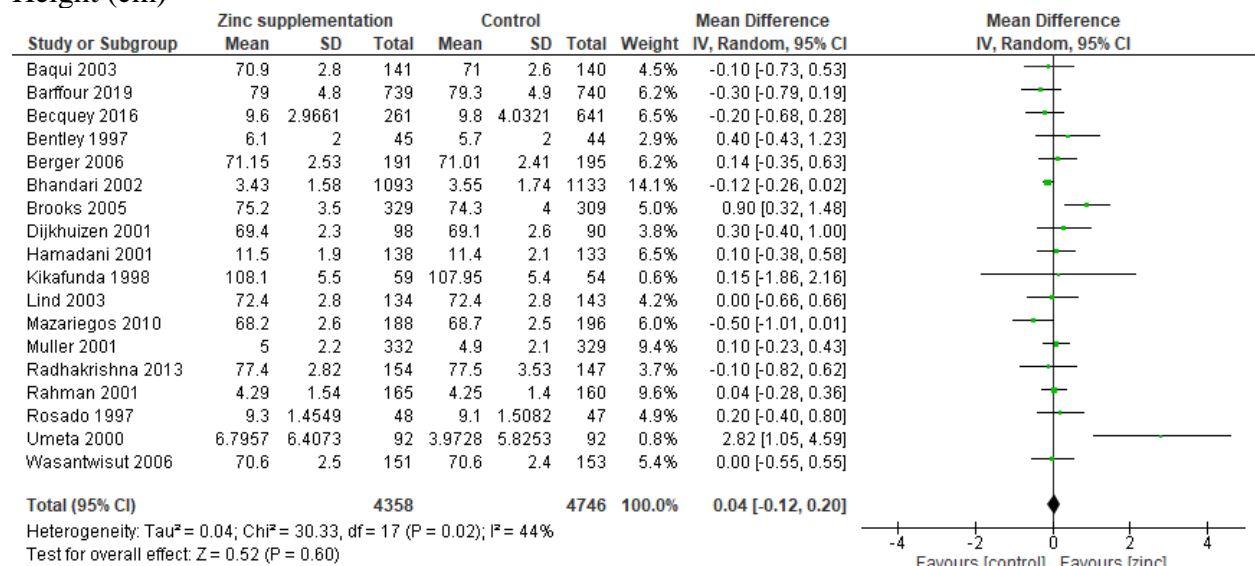

## Weight (kg)

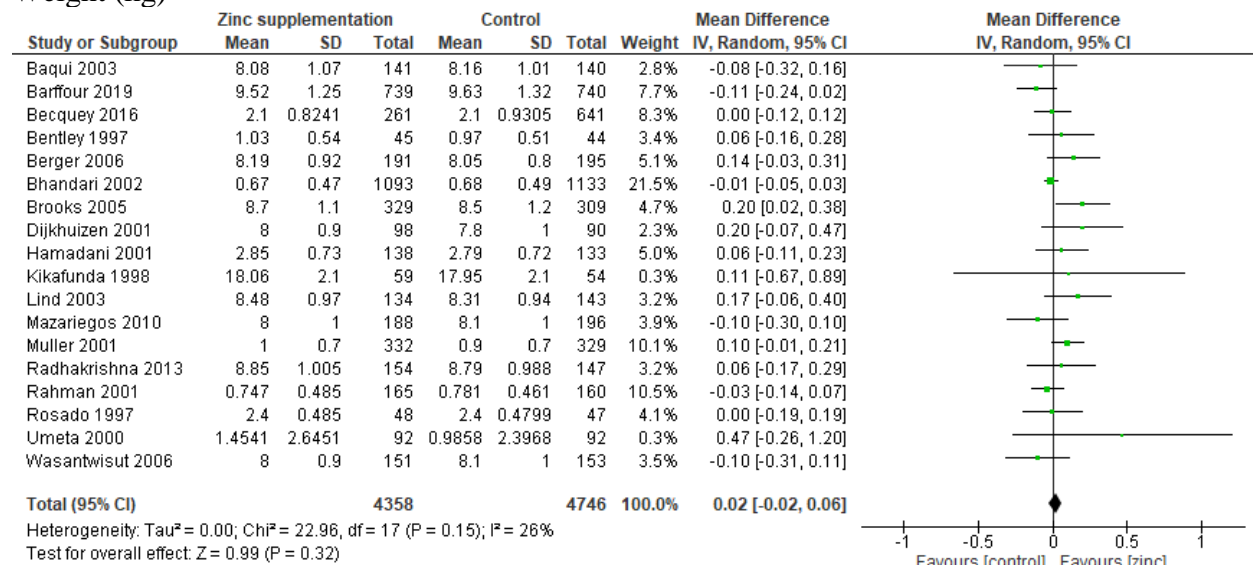

## Head circumference (cm)

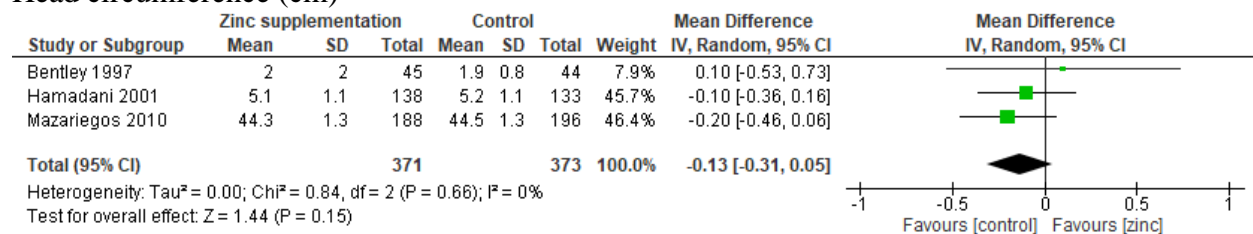

## Mid-upper arm circumference (cm)

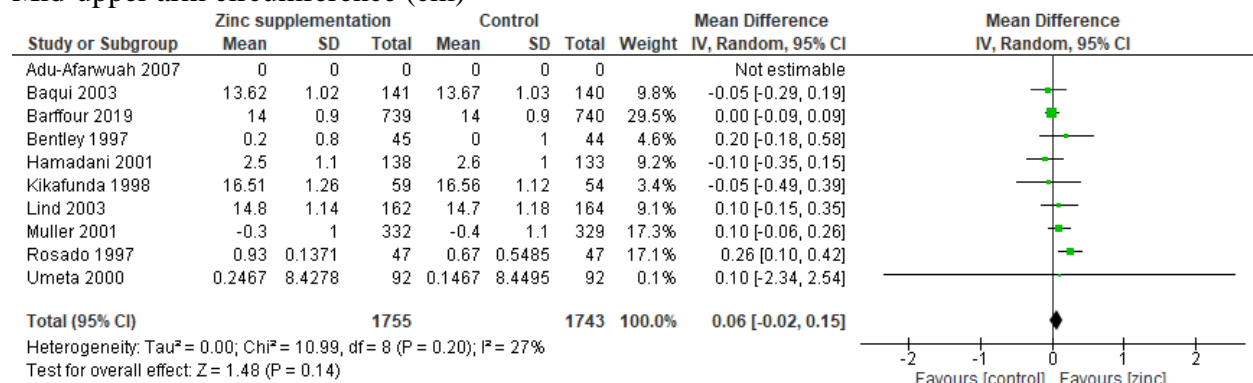

## Length-for-age (z-score)

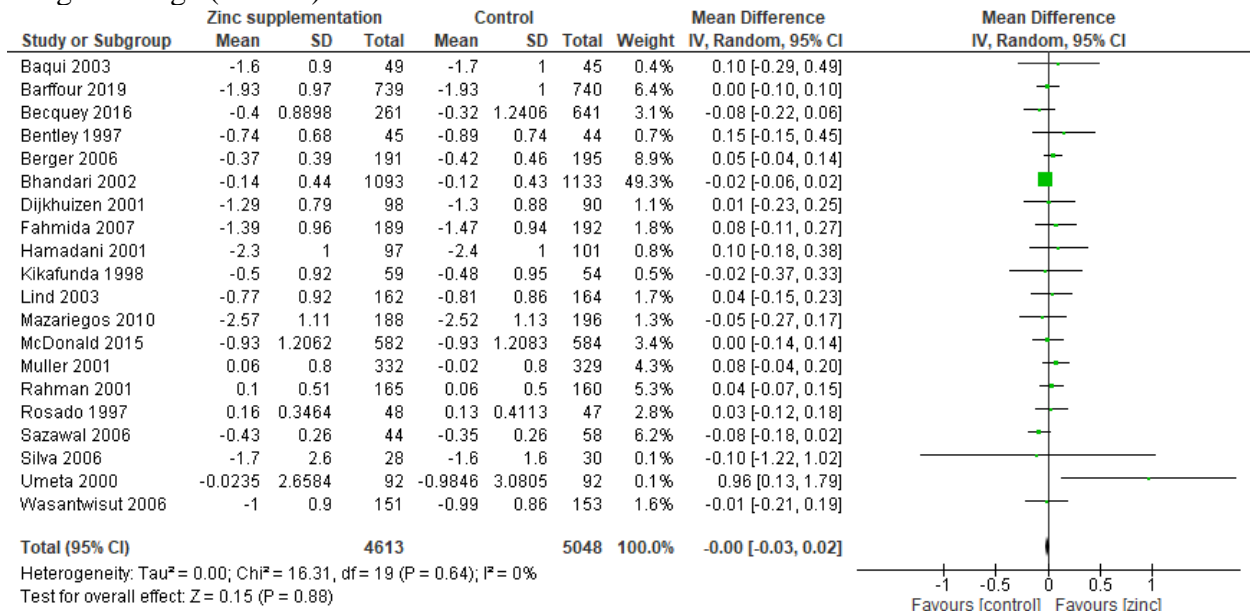

## Weight-for-age (z-score)

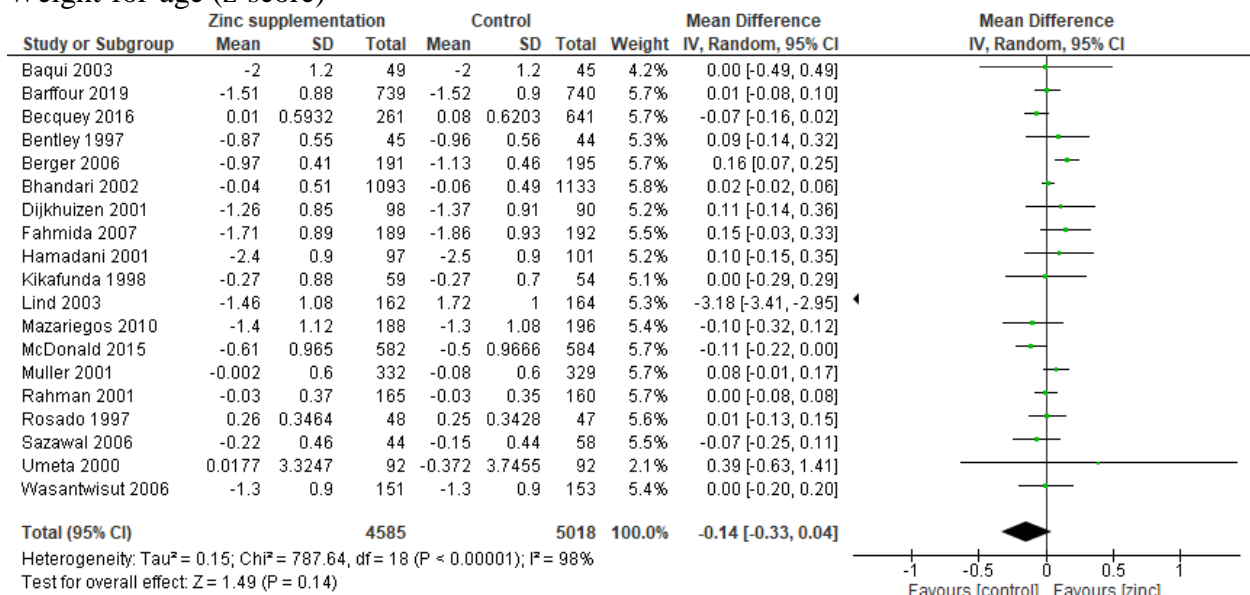



## Weight-for-height (z-score)

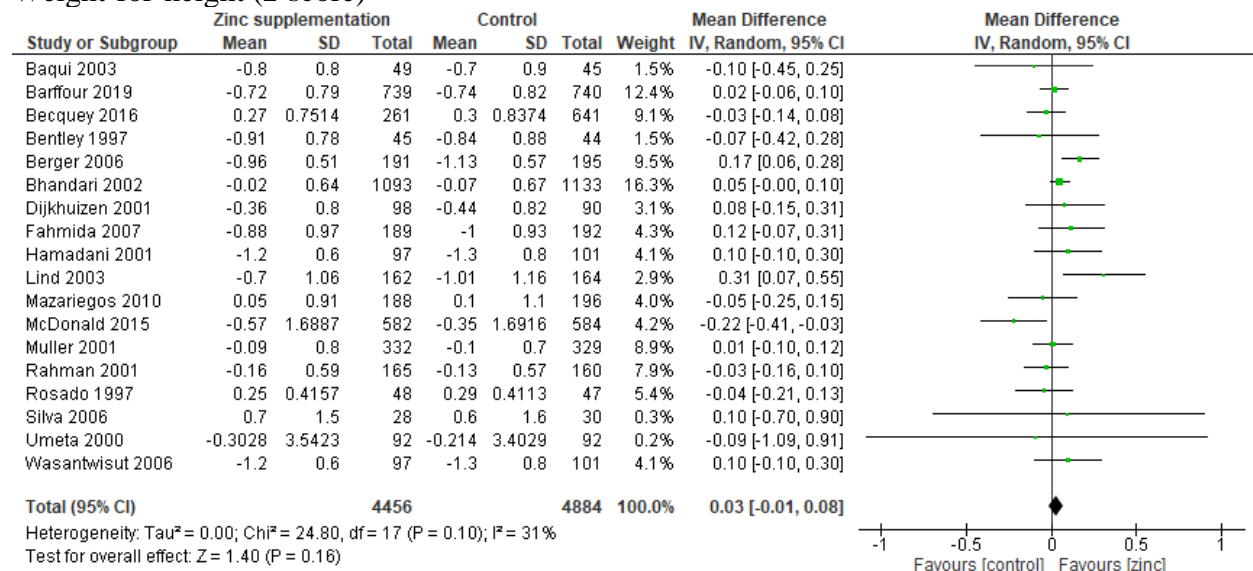

## Hemoglobin (g/L)

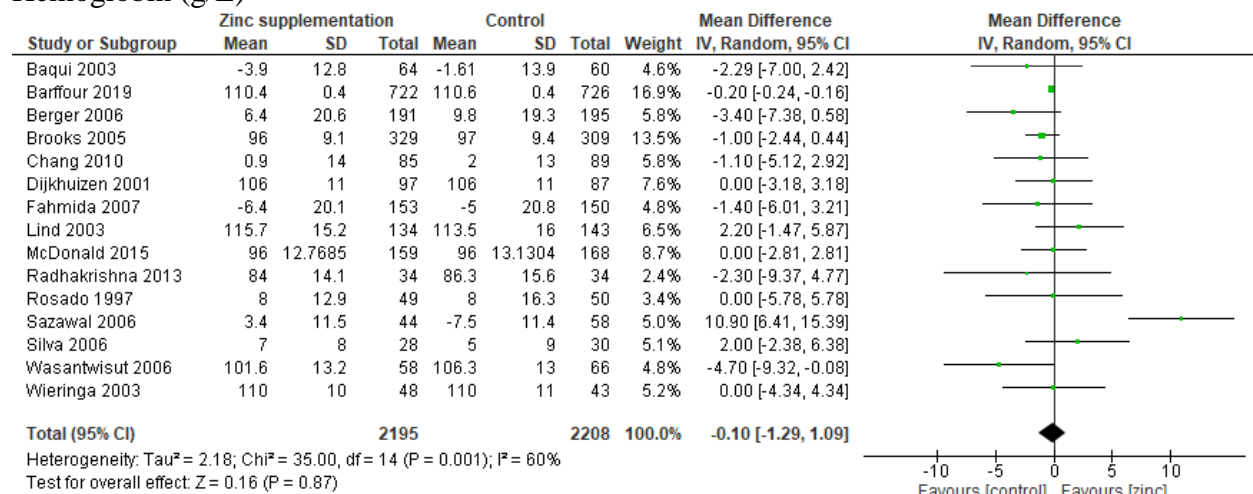

## Plasma/serum ferritin (μg/L)

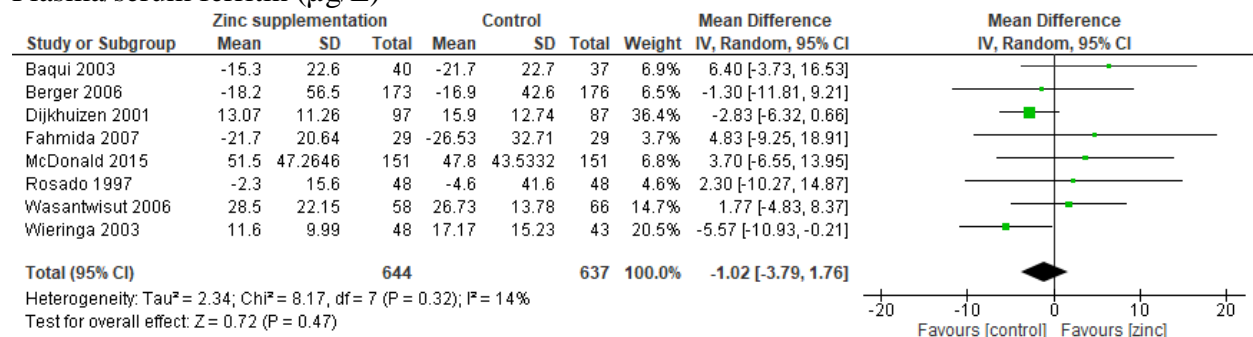

## Plasma/serum TfR (mg/L)

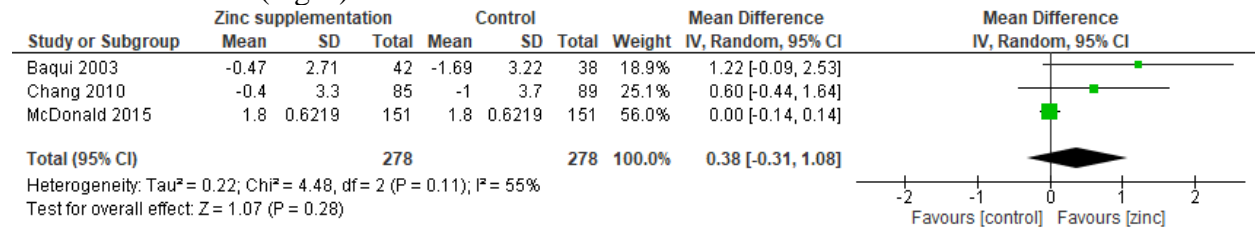

## Plasma/serum retinol ( $\mu\text{mol/L}$ )

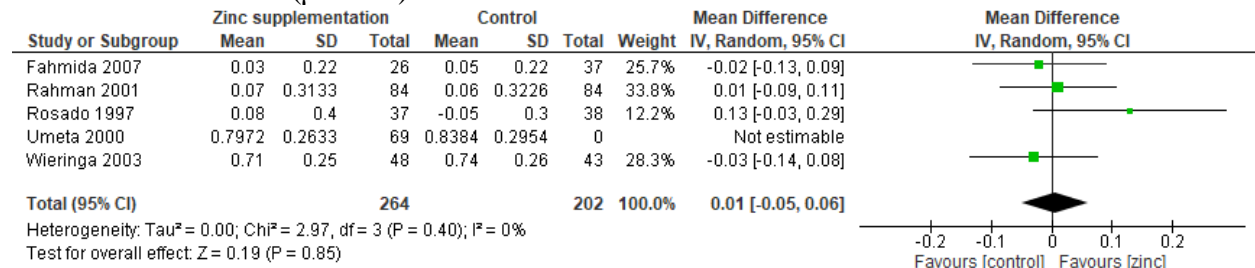

## Plasma/serum zinc ( $\mu\text{mol/L}$ )

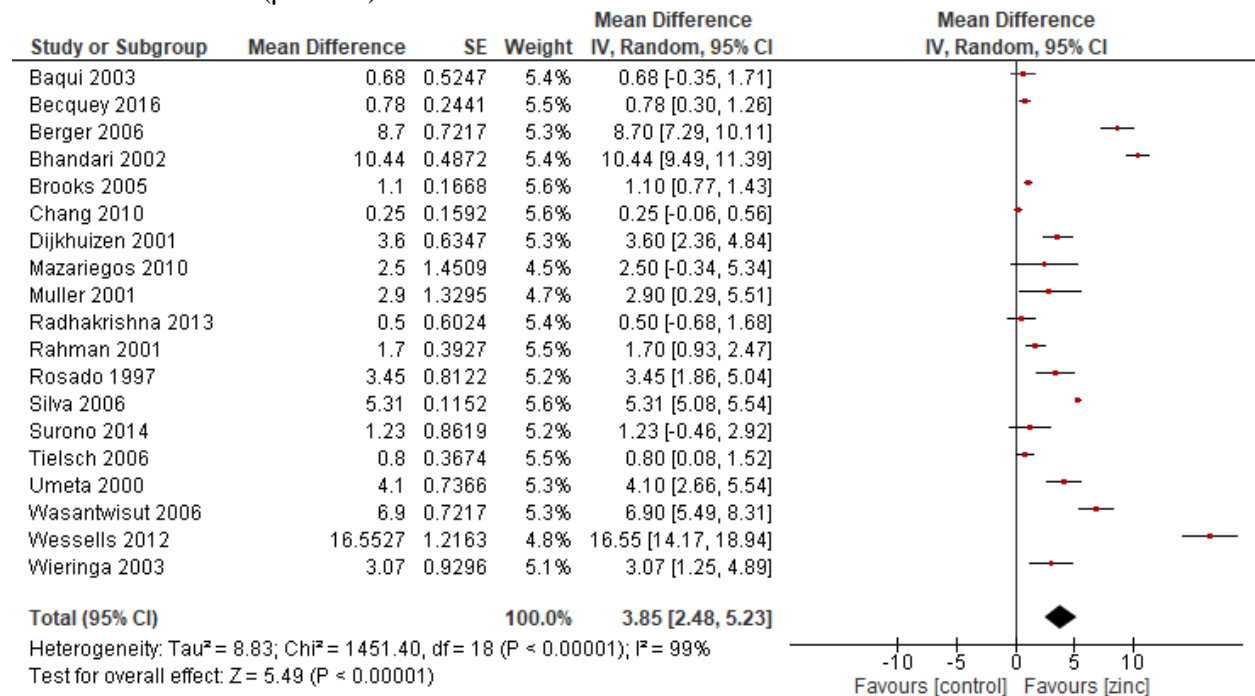

## Iron deficiency (serum/plasma ferritin <12µg/L)

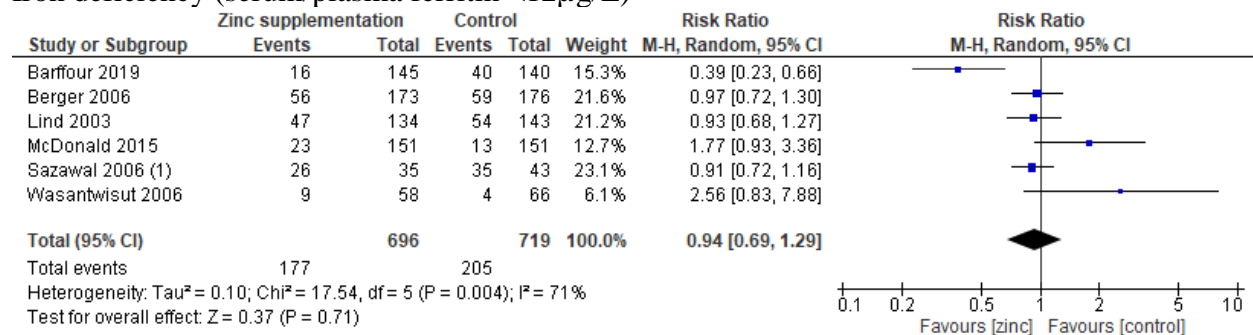

### Footnotes

(1) Zinc protoporphyrin >=90µmol/mol heme

## Zinc deficiency (serum/plasma zinc <10.7µmol/L)

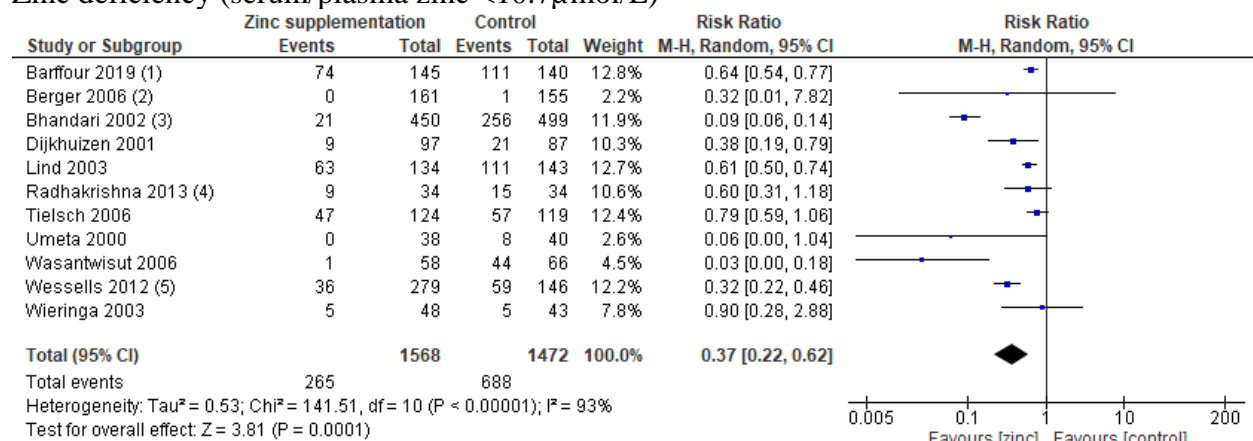

### Footnotes

(1) Plasma zinc <9.94µmol/L

(2) Serum zinc <9.9µmol/L

(3) Plasma zinc <9.17µmol/L

(4) Serum zinc <9.17µmol/L

(5) Plasma zinc <9.94µmol/L

## Diarrhea (incidence)

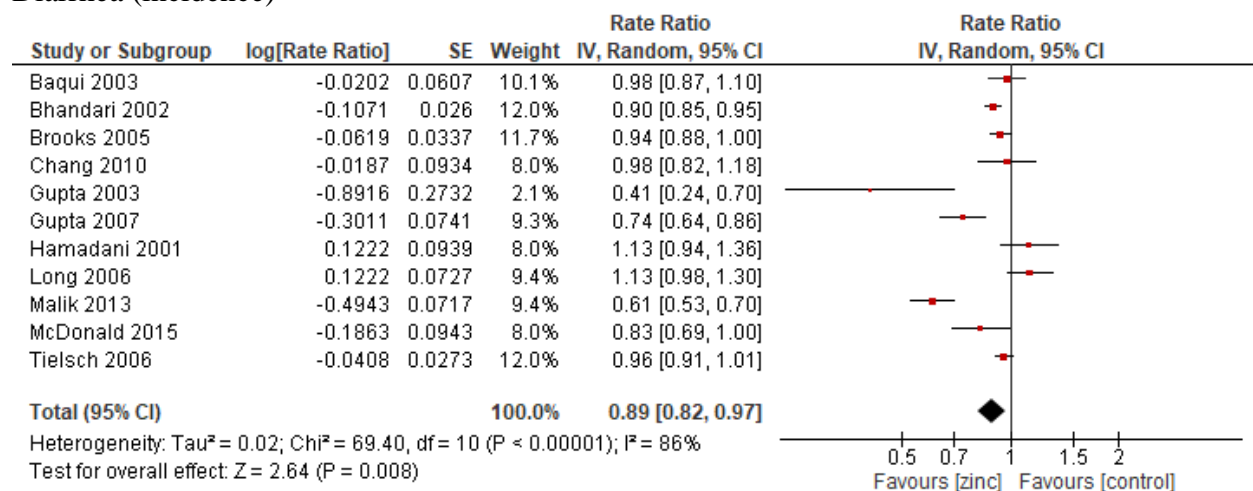

## Lower respiratory tract infection (incidence)

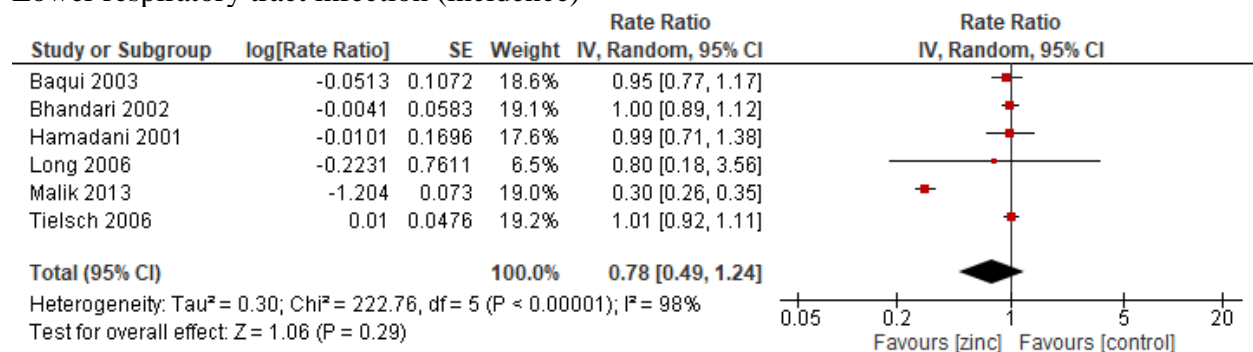

## Mental development

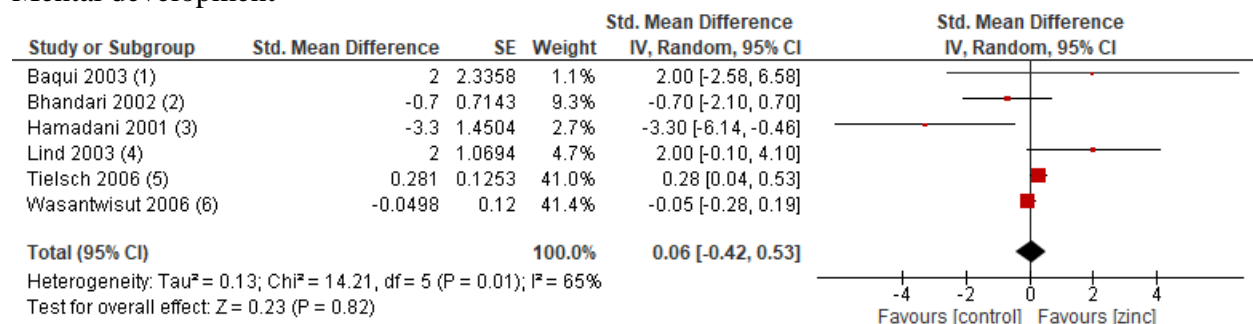

### Footnotes

- (1) Mental Development Index (Bayley Scales of Infant Development)
- (2) Mental Development Index (Bayley Scales of Infant Development)
- (3) Mental Development Index (Bayley Scales of Infant Development)
- (4) Mental Development Index (Bayley Scales of Infant Development)
- (5) Universal Test of Nonverbal Intelligence
- (6) Full IQ (Wechsler Intelligence Scale for Children 3rd edition)

## Mental development (Mental Development Index of Bayley Scales of Infant Development)

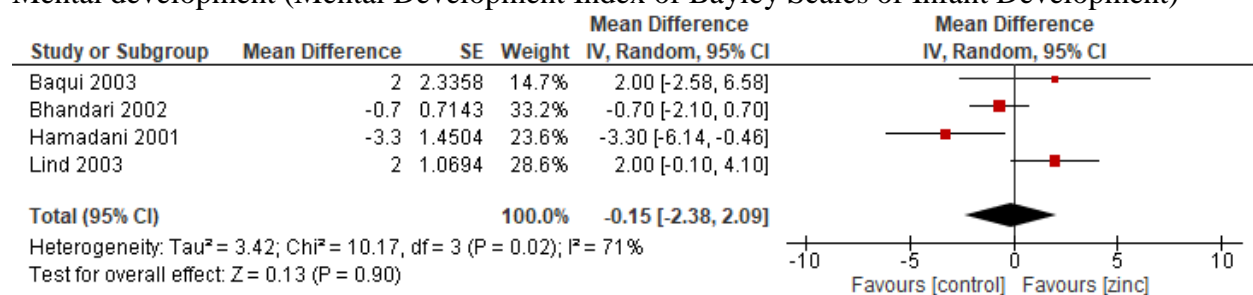

## Motor development

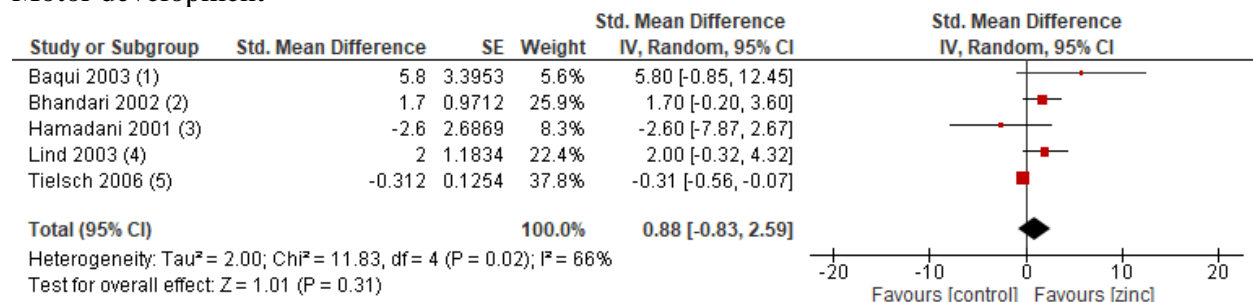

### Footnotes

- (1) Psychomotor Development Index (Bayley Scales of Infant Development)  
 (2) Psychomotor Development Index (Bayley Scales of Infant Development)  
 (3) Psychomotor Development Index (Bayley Scales of Infant Development)  
 (4) Psychomotor Development Index (Bayley Scales of Infant Development)  
 (5) Movement Assessment Battery for Children

## Motor development (Psychomotor Development Index of Bayley Scales of Infant Development)

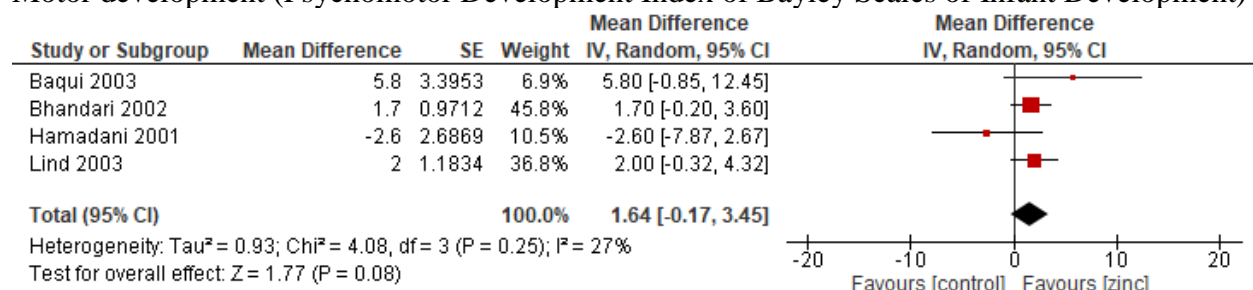

## Comparison 3: Iron Supplementation vs. Placebo/No Intervention (Efficacy)

### Stunting

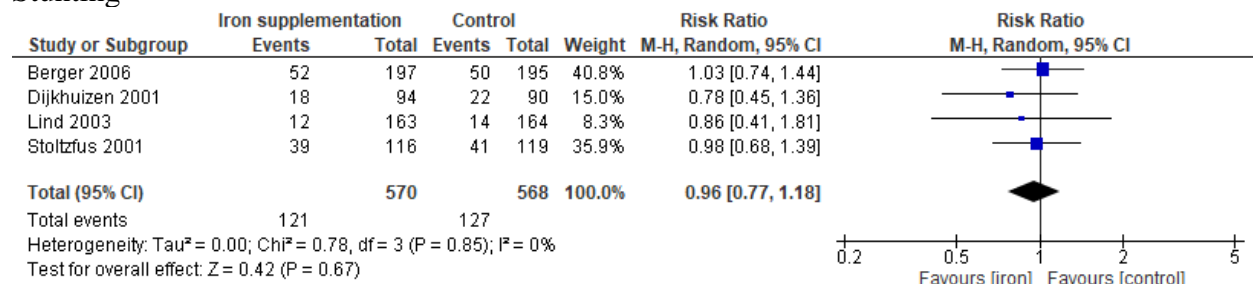

### Wasting

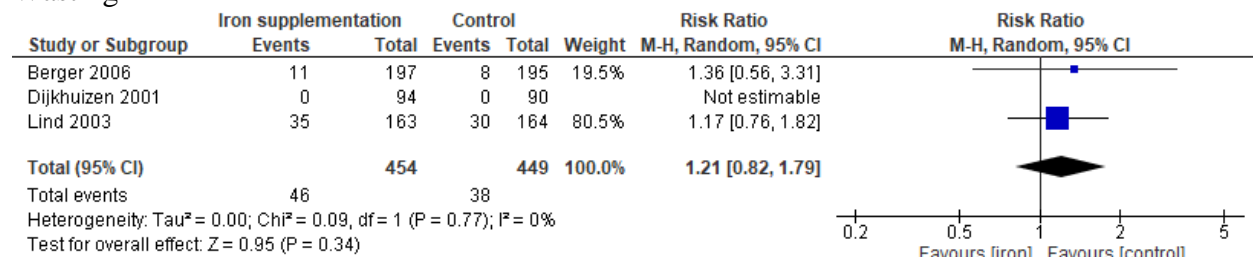

## Height (cm)

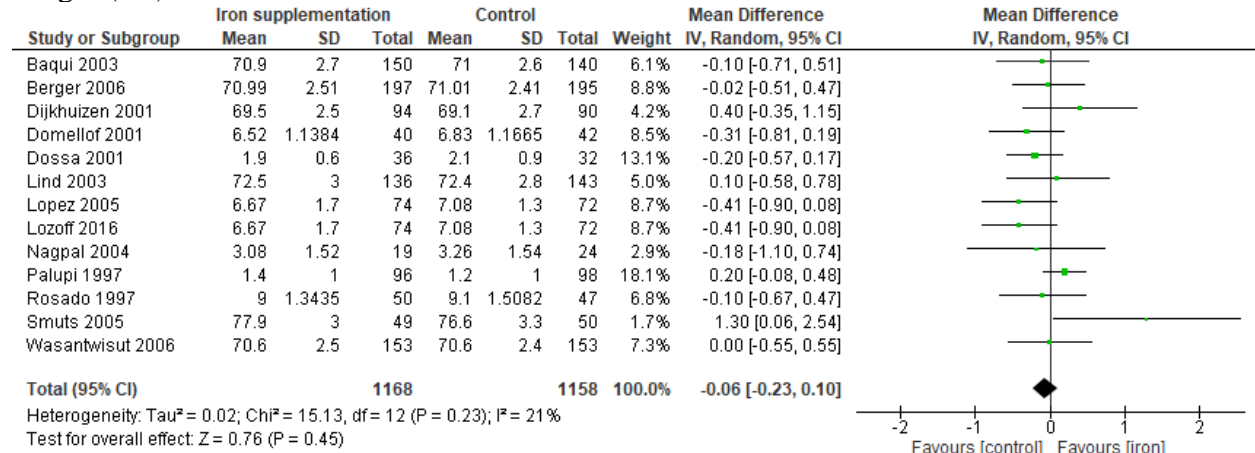

## Weight (kg)

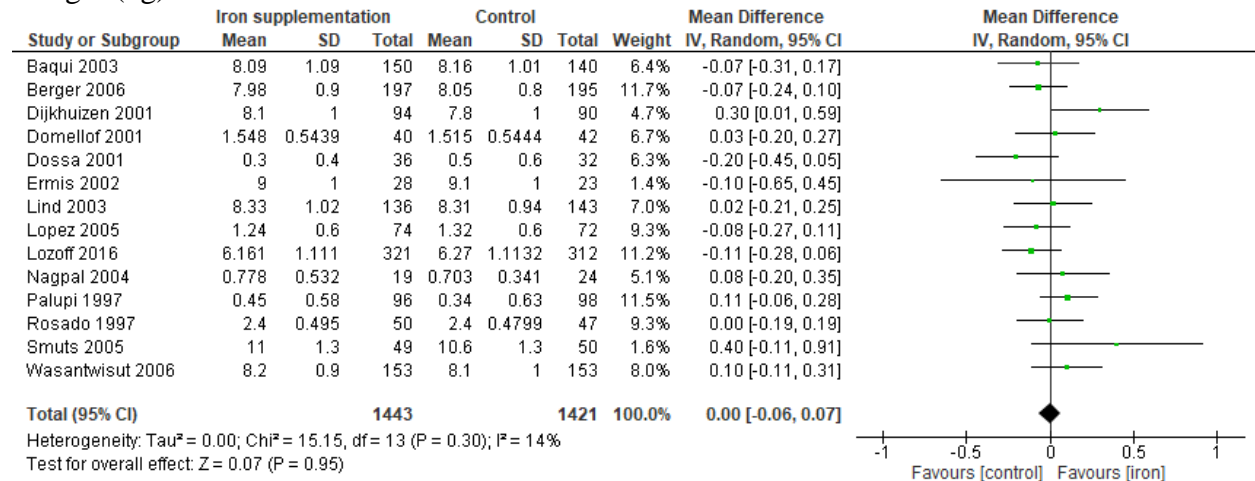

## Length-for-age (z-score)

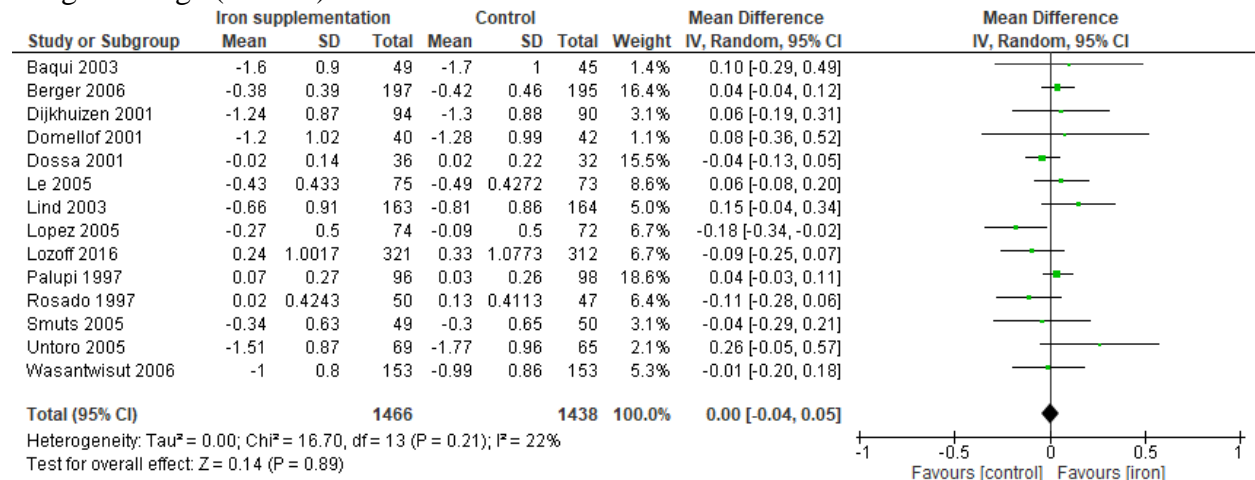

## Weight-for-age (z-score)

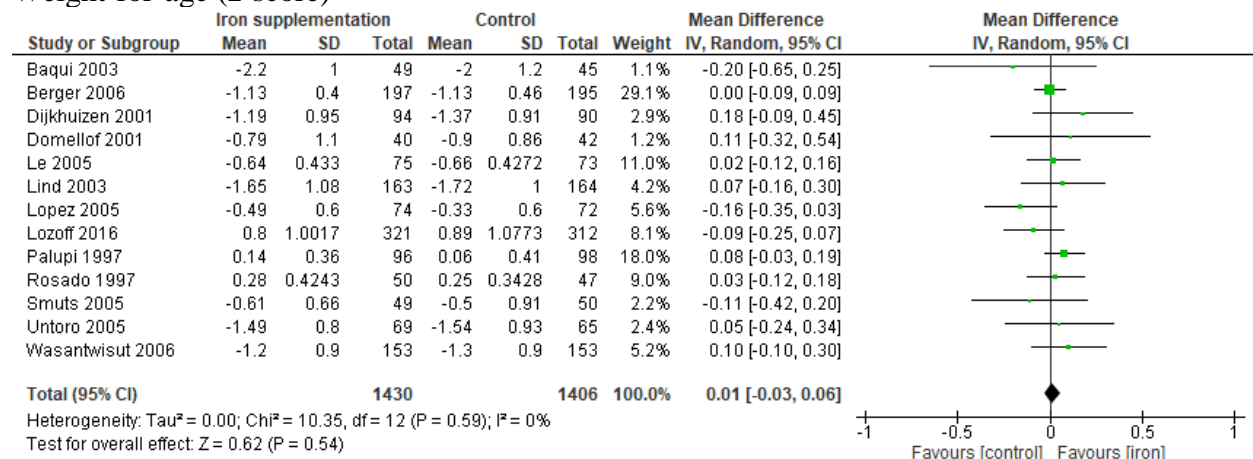

## Weight-for-height (z-score)

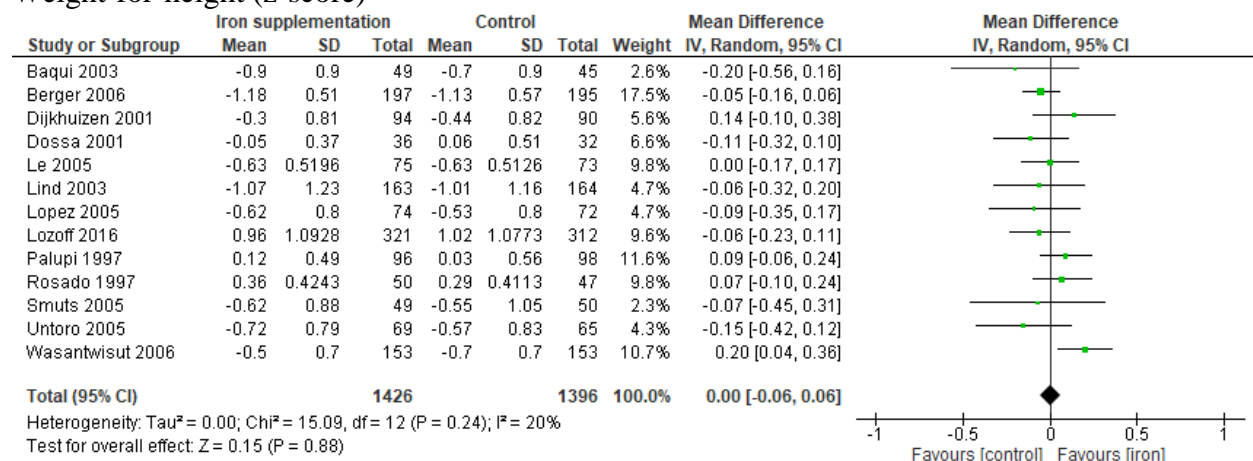

## Mid-upper arm circumference (cm)

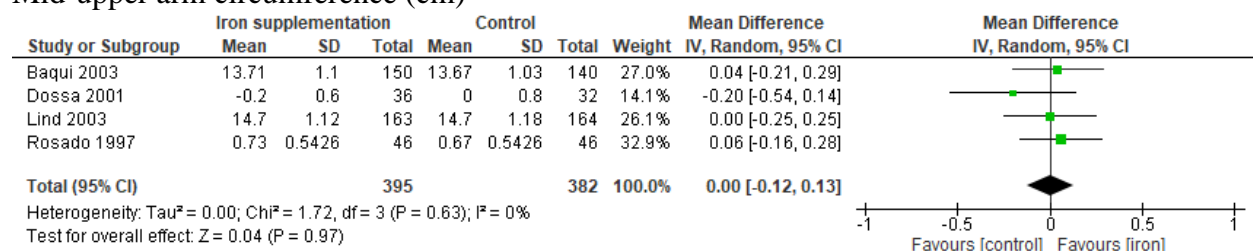



## Hemoglobin (g/L)

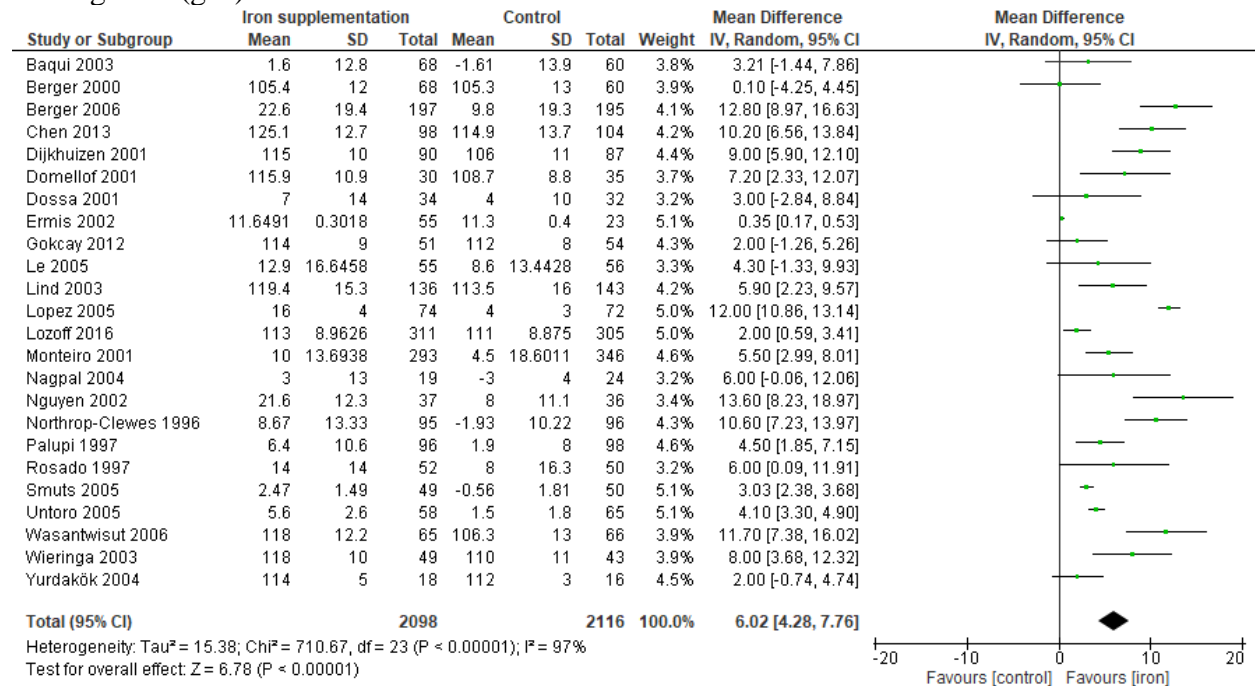

## Plasma/serum ferritin ( $\mu\text{g/L}$ )

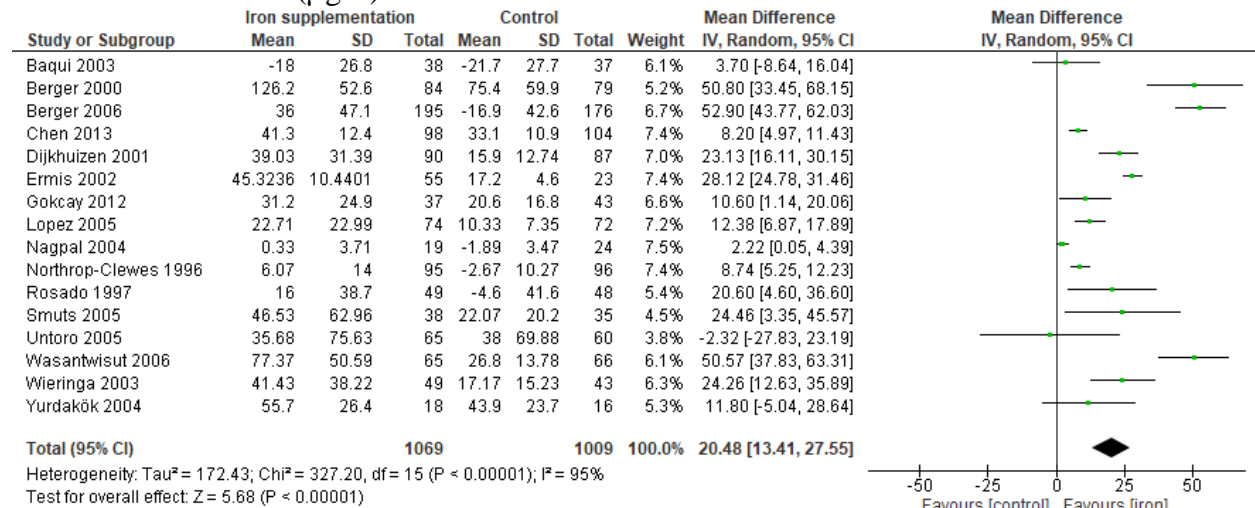

## Plasma/serum ferritin (geometric means) ( $\mu\text{g/L}$ )

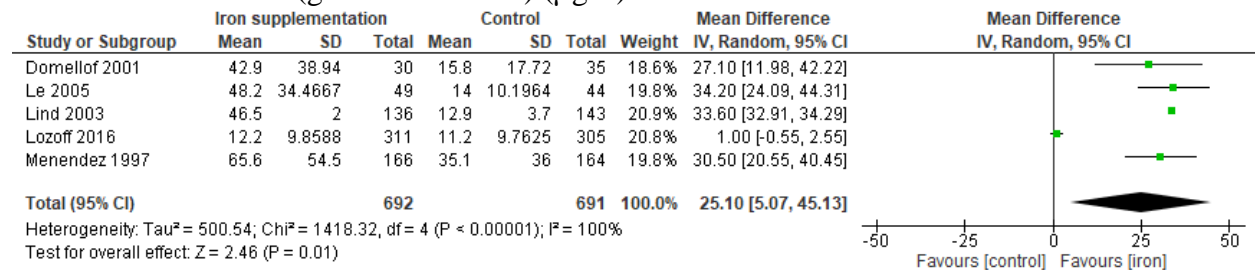



## Plasma/serum retinol (μmol/L)

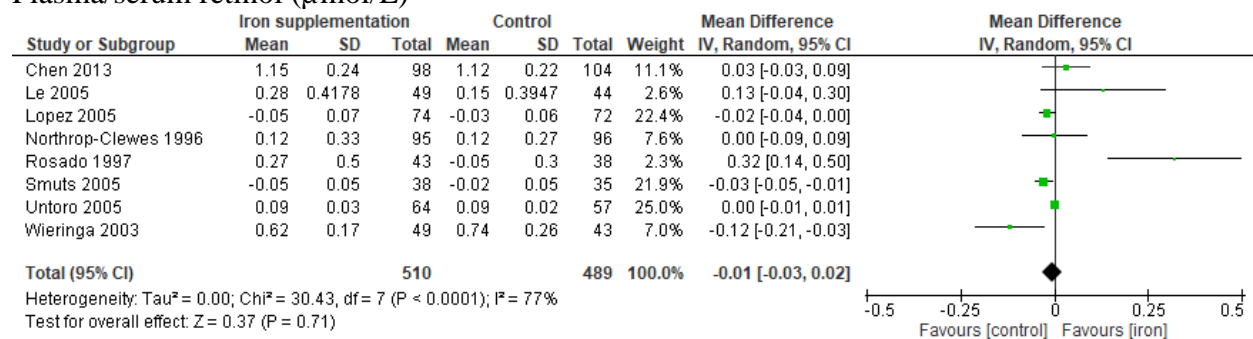

## Plasma/serum zinc (μmol/L)

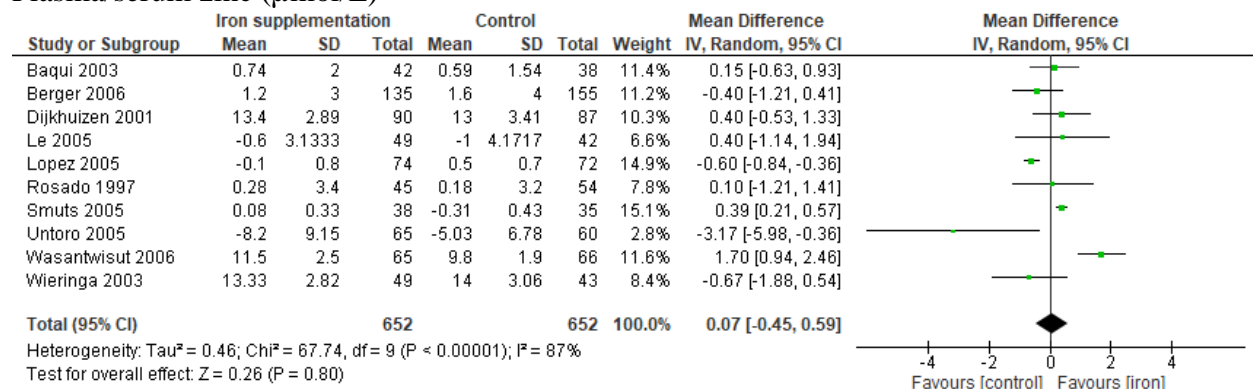

## Iron deficiency (serum/plasma ferritin <12μg/L)

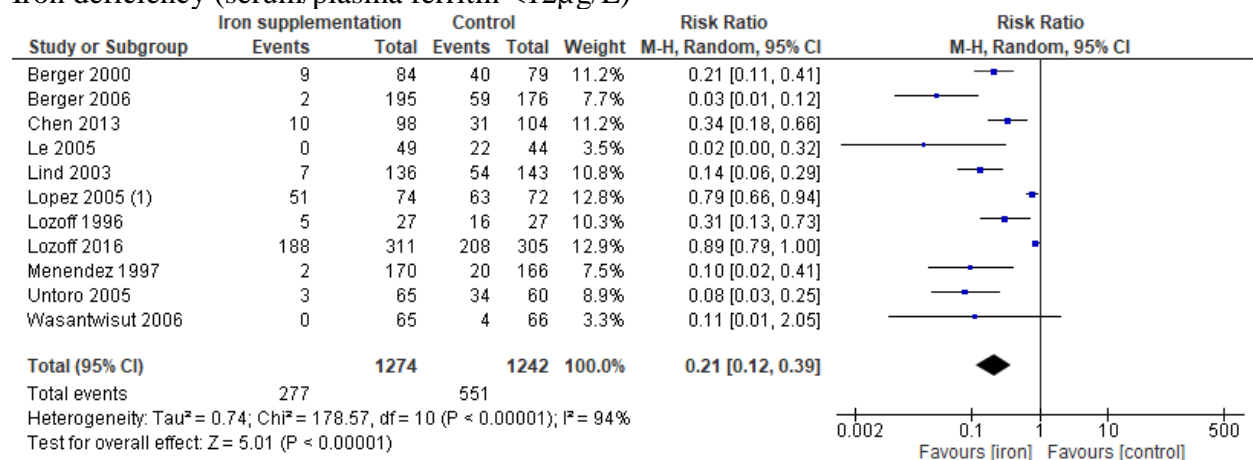

### Footnotes

(1) Plasma ferritin <20ug/L

## Zinc deficiency (serum/plasma retinol <10.7µmol/L)

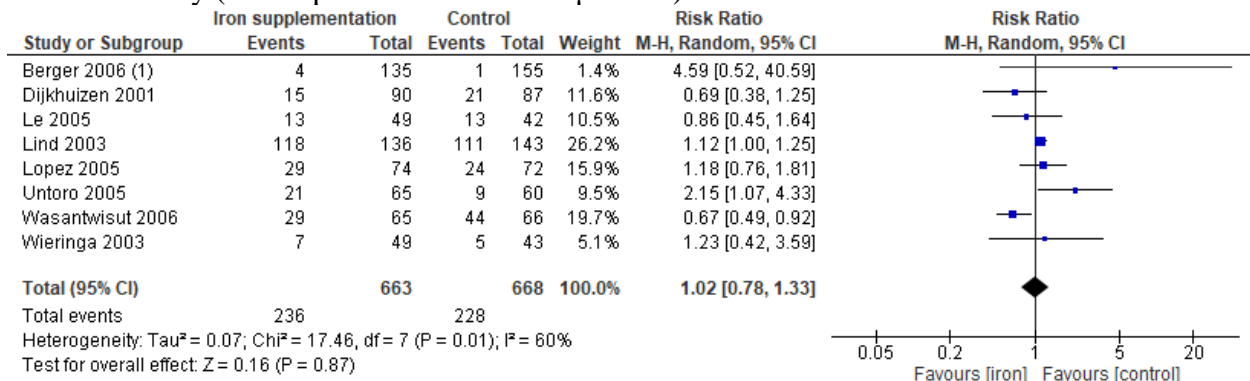

### Footnotes

(1) Serum zinc <9.9µmol/L

## Vitamin A deficiency (serum/plasma retinol <0.7µmol/L)

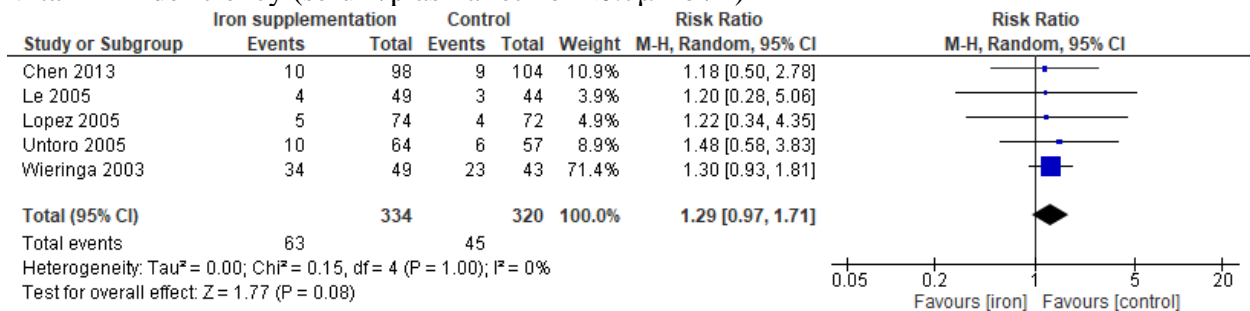

## Iron-deficiency anemia

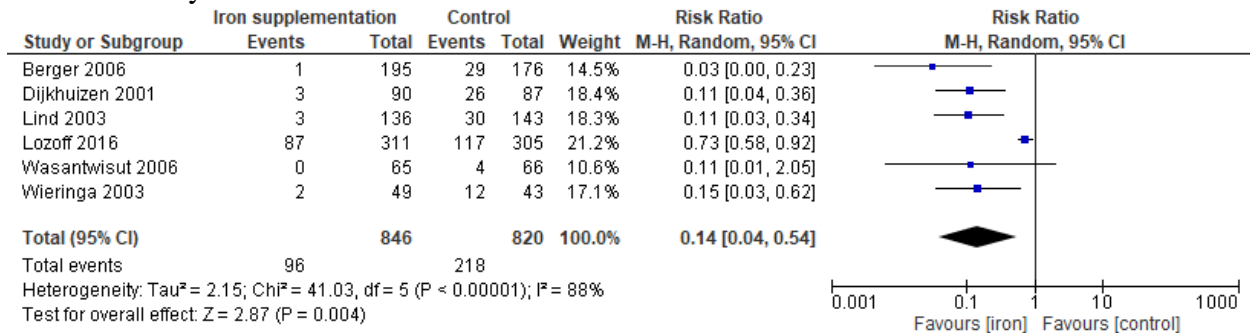

## Diarrhea (cumulative incidence)

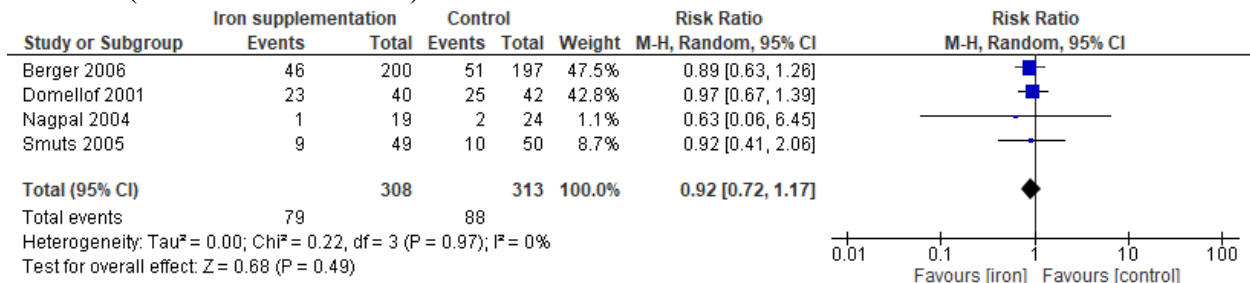

## Mental development

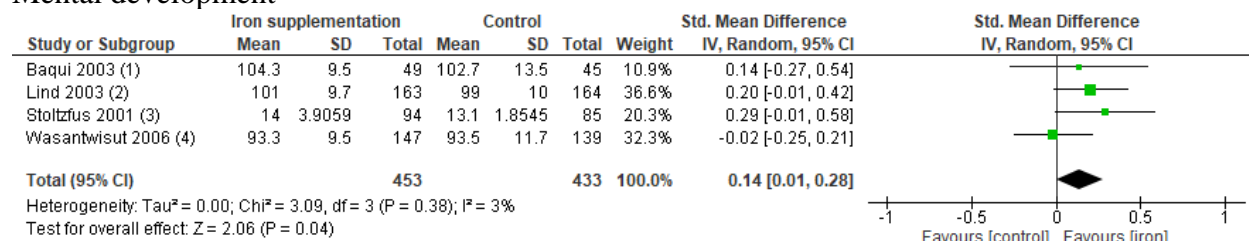

### Footnotes

- (1) Mental Development Index (Bayley Scales of Infant Development)
- (2) Mental Development Index (Bayley Scales of Infant Development)
- (3) Language (Griffiths and McCarthy scales of mental development)
- (4) Full IQ (Wechsler Intelligence Scale for Children 3rd edition)

## Motor development

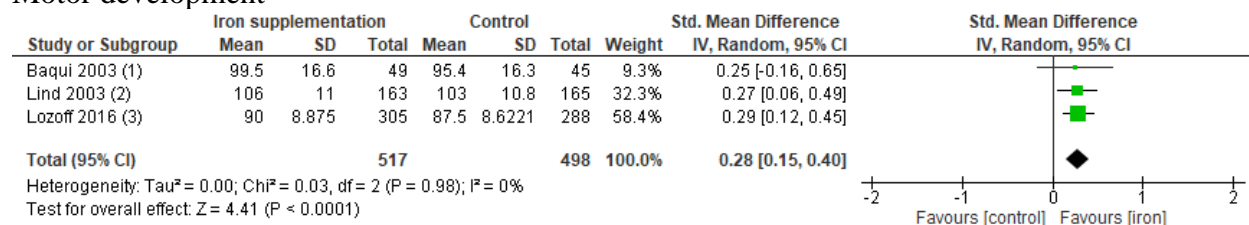

### Footnotes

- (1) Psychomotor Development Index (Bayley Scales of Infant Development)
- (2) Psychomotor Development Index (Bayley Scales of Infant Development)
- (3) Gross motor score (Peabody Developmental Motor Scale 2nd Edition)

### Comparison 3: Subgroup Analyses for Iron Supplementation vs. Placebo/No Intervention (Efficacy)

Anemia: WHO region

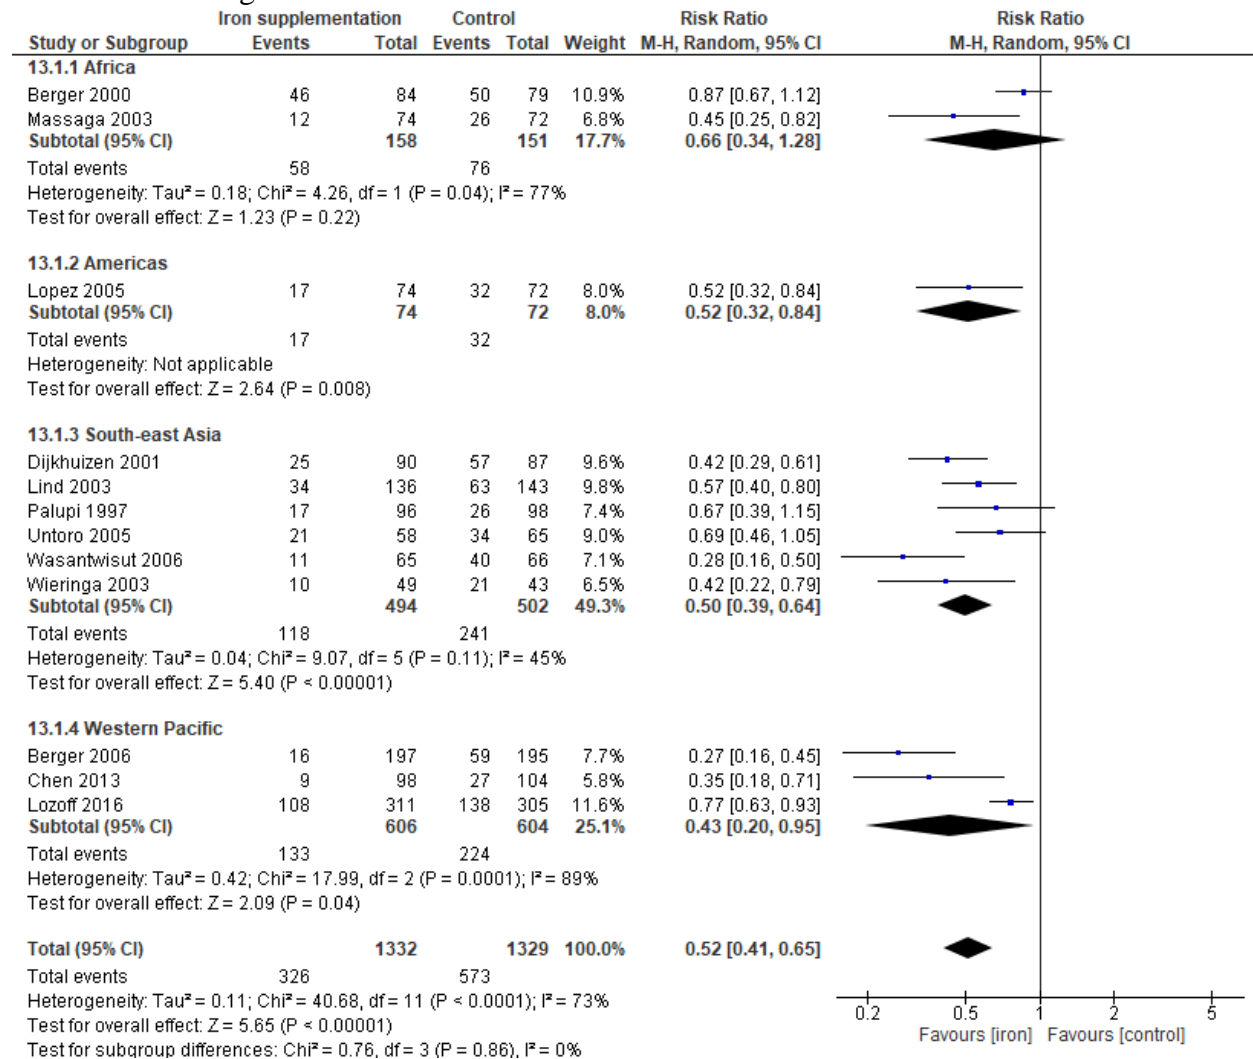

## Anemia: mean age at baseline

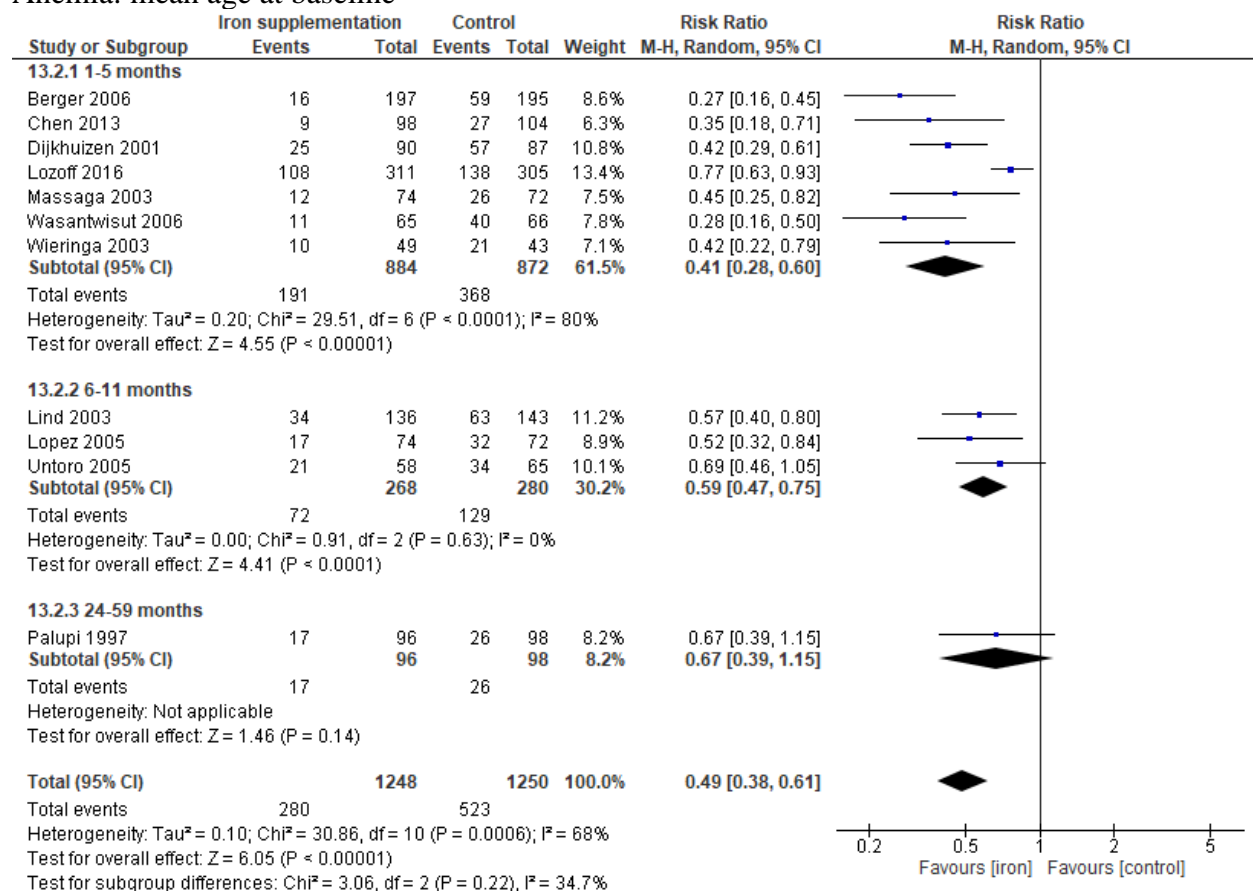

## Anemia: intervention duration

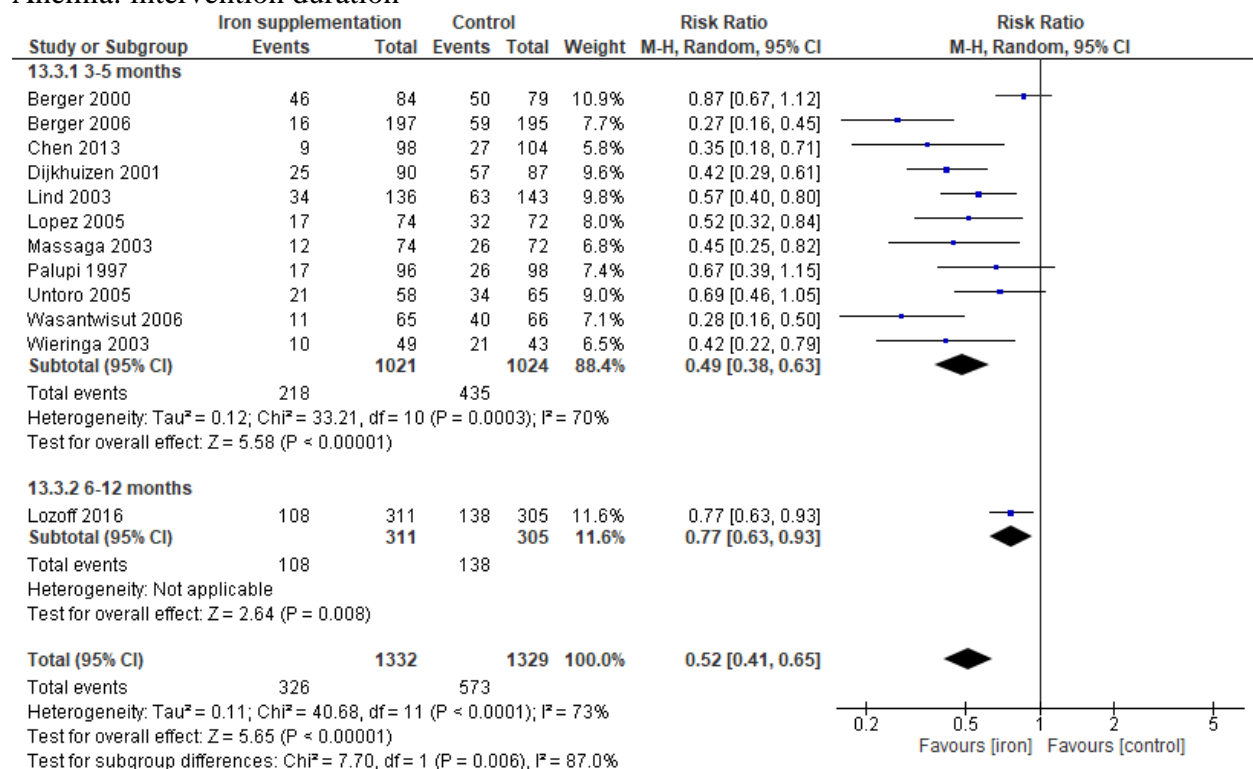

## Anemia: intervention frequency

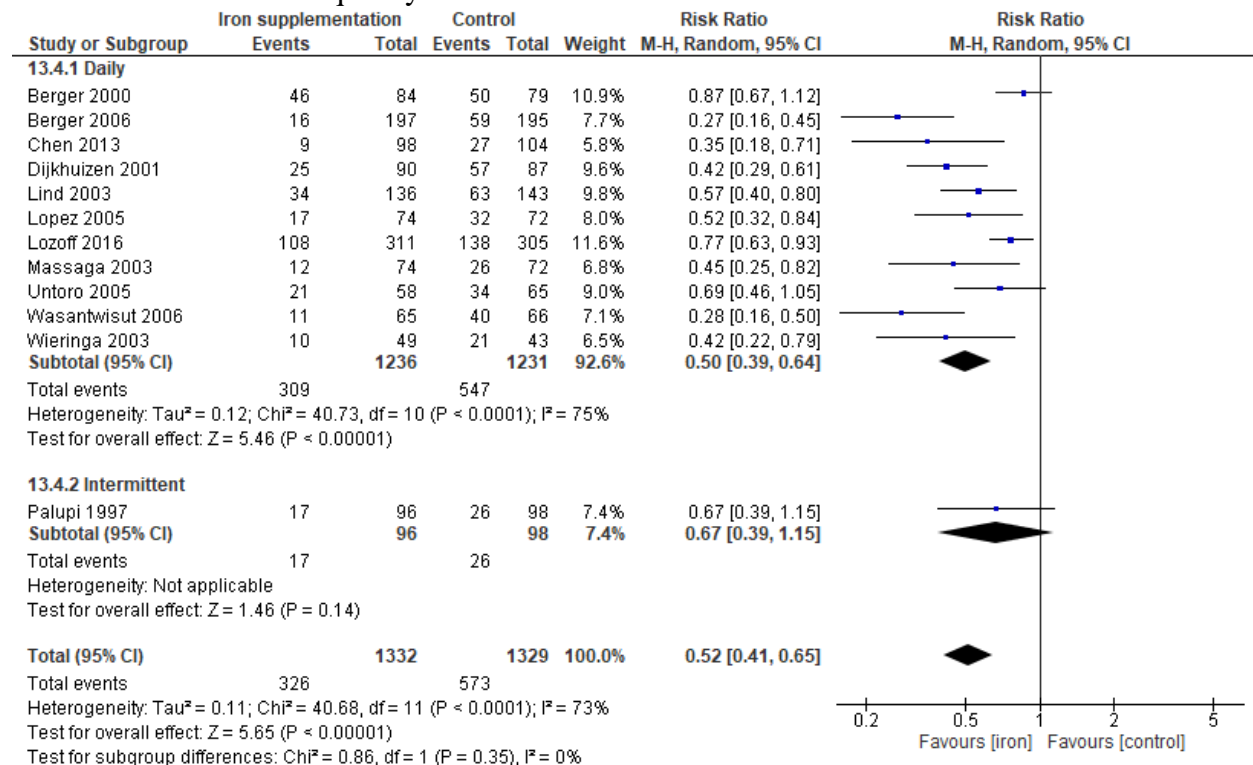

## Anemia: nutritional status at baseline (anemic vs. non-anemic)

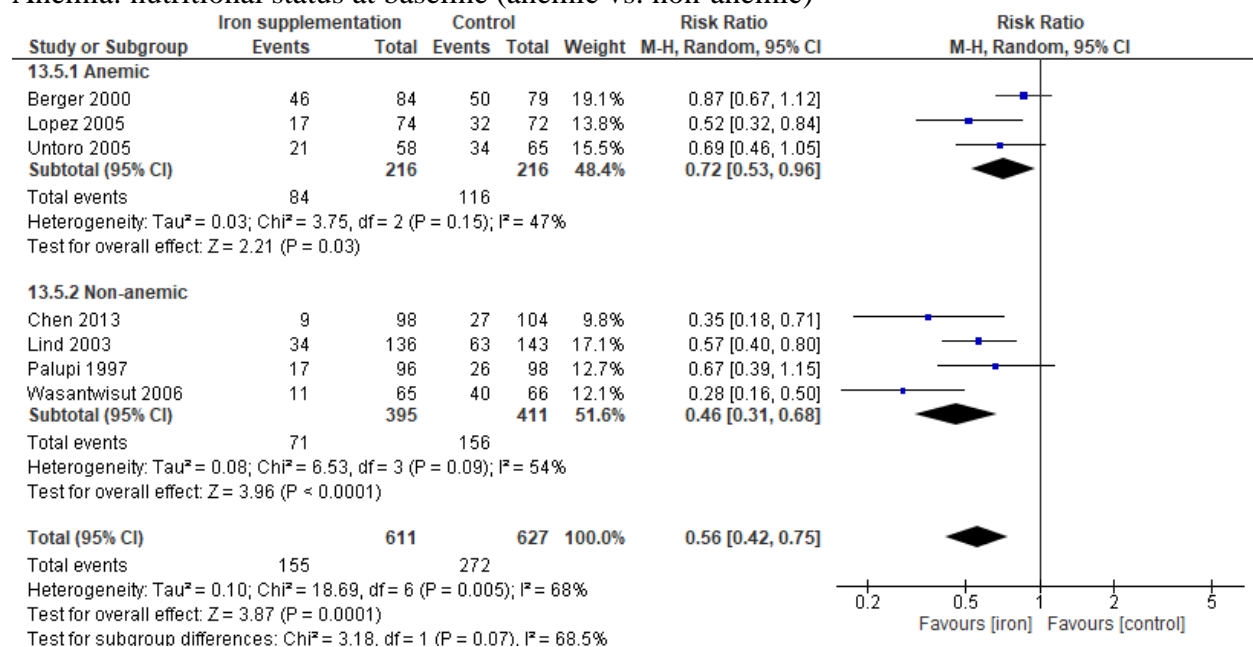

## Comparison 4: Iron-folic Acid Supplementation vs. Placebo/No intervention (Efficacy)

### Hemoglobin (g/L)

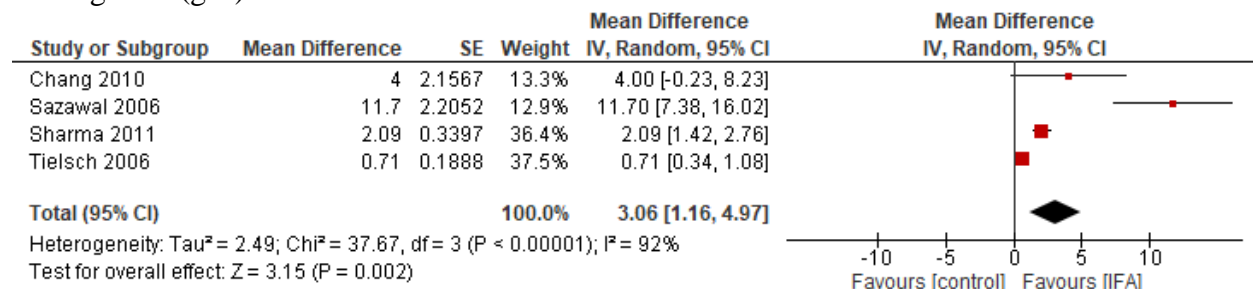

### Diarrhea (incidence)

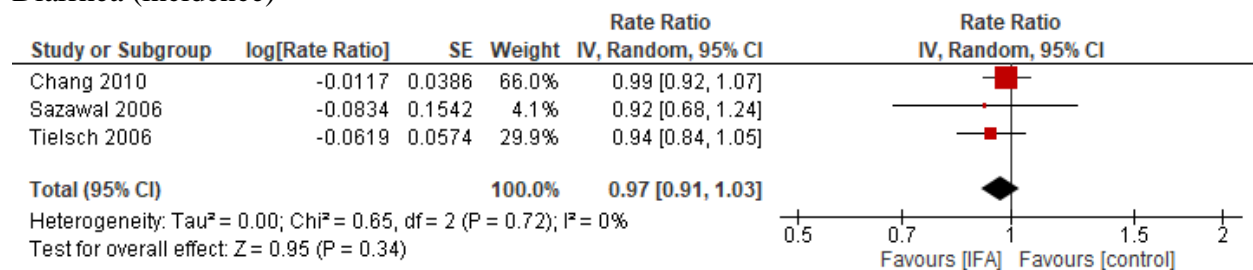

## Comparison 4: Subgroup Analyses for Iron-folic Acid Supplementation vs. Placebo/No Intervention (Efficacy)

### Anemia: WHO region

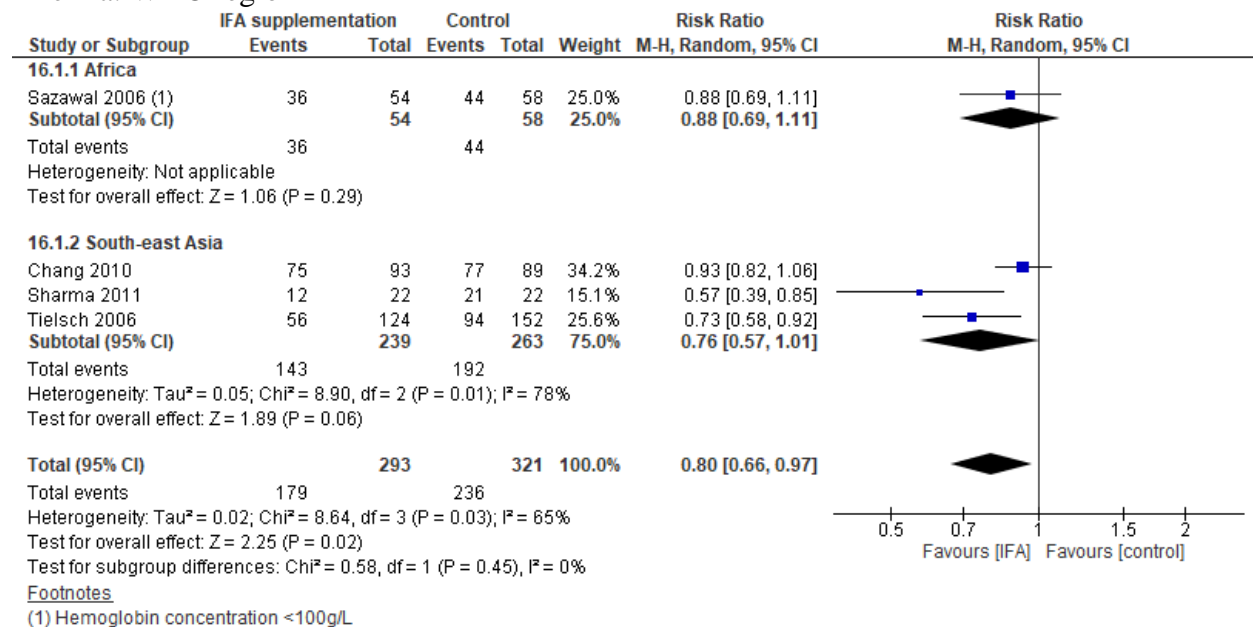

### Anemia: intervention frequency

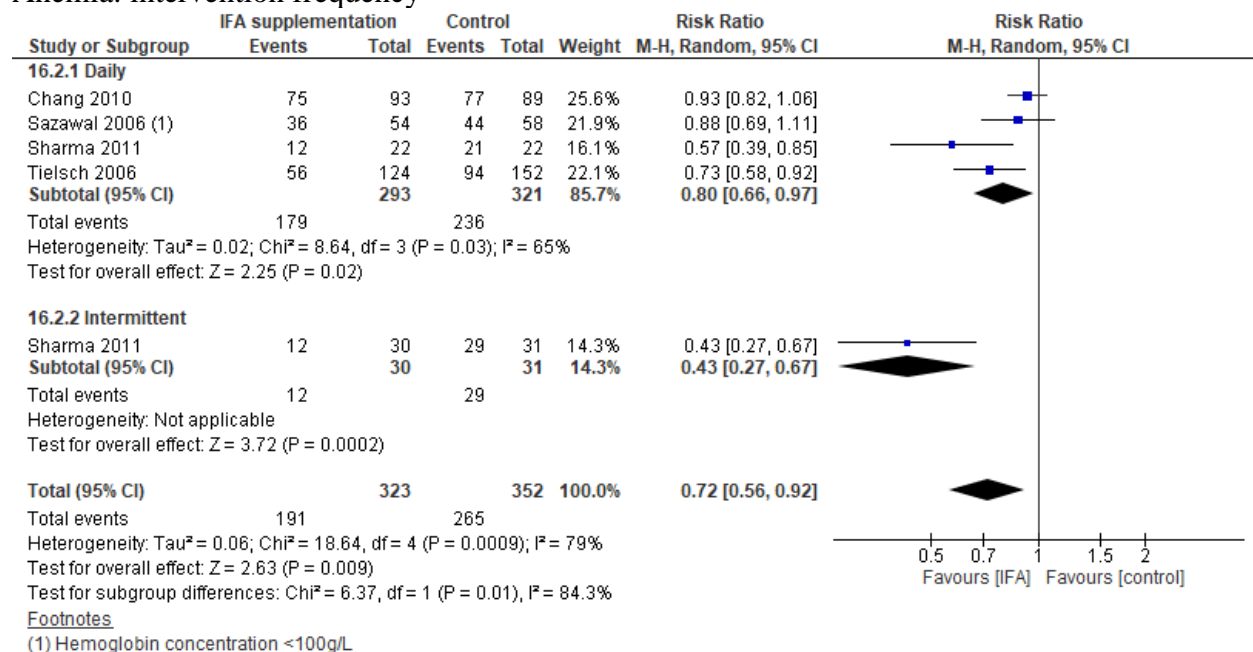



## Comparison 5: MMN Supplementation vs. Placebo/No Intervention (Efficacy)

### Height (cm)

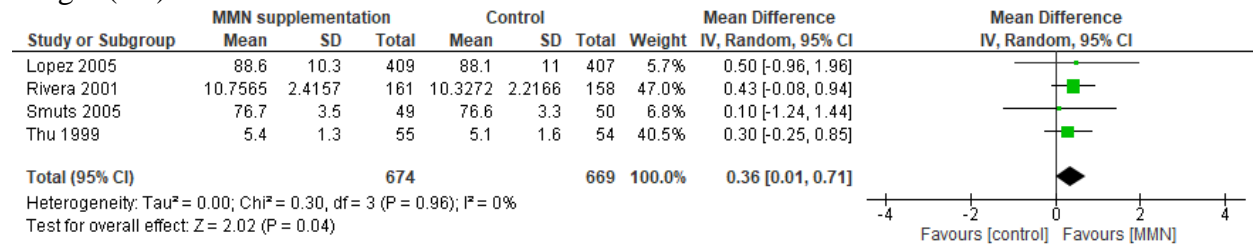

### Weight (kg)

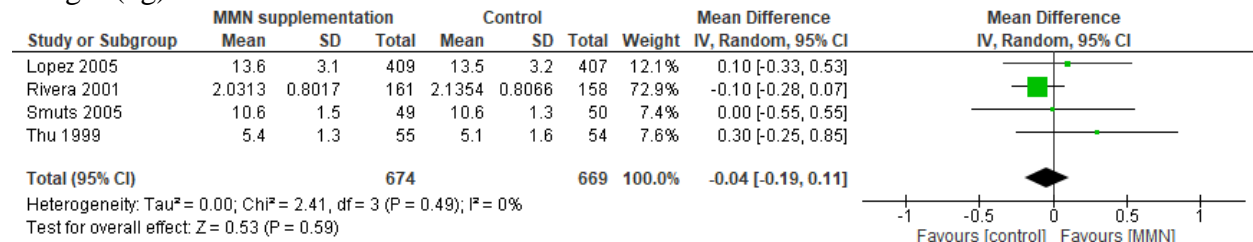

### Length-for-age (z-score)

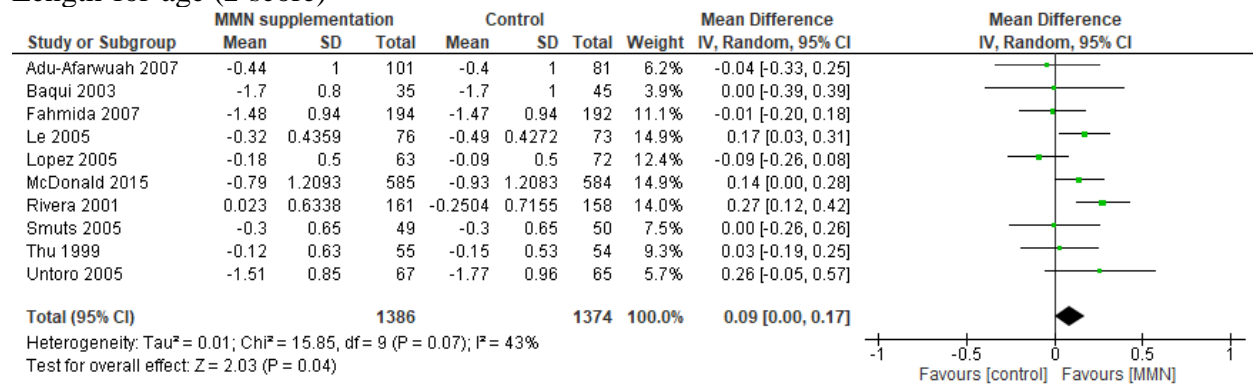

### Weight-for-age (z-score)

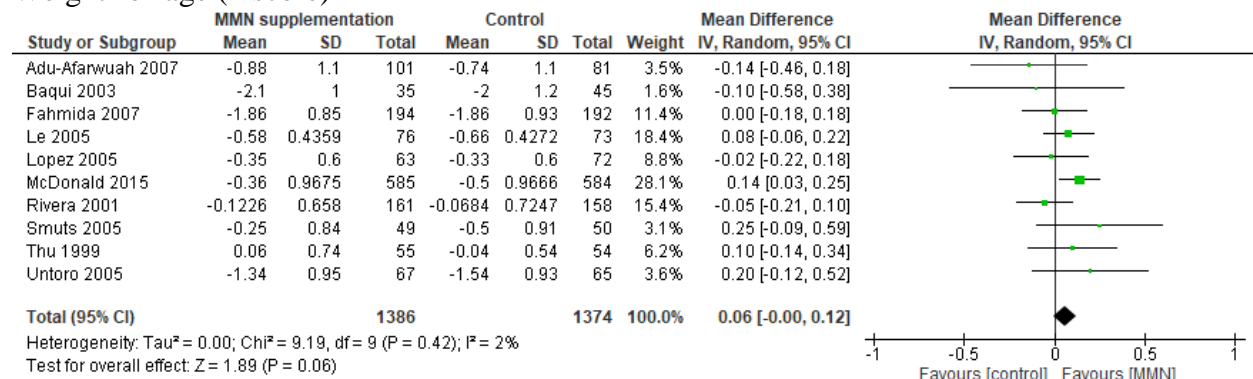

## Weight-for-height (z-score)

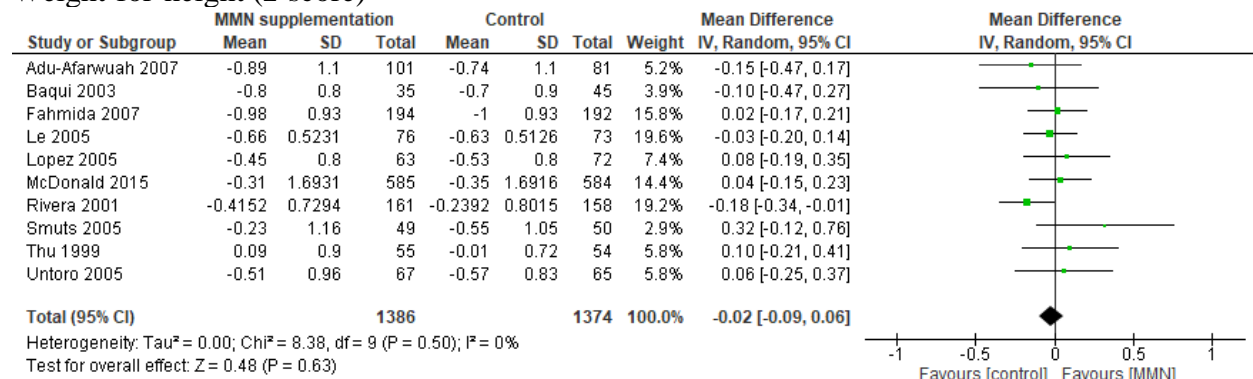

## Hemoglobin (g/L)

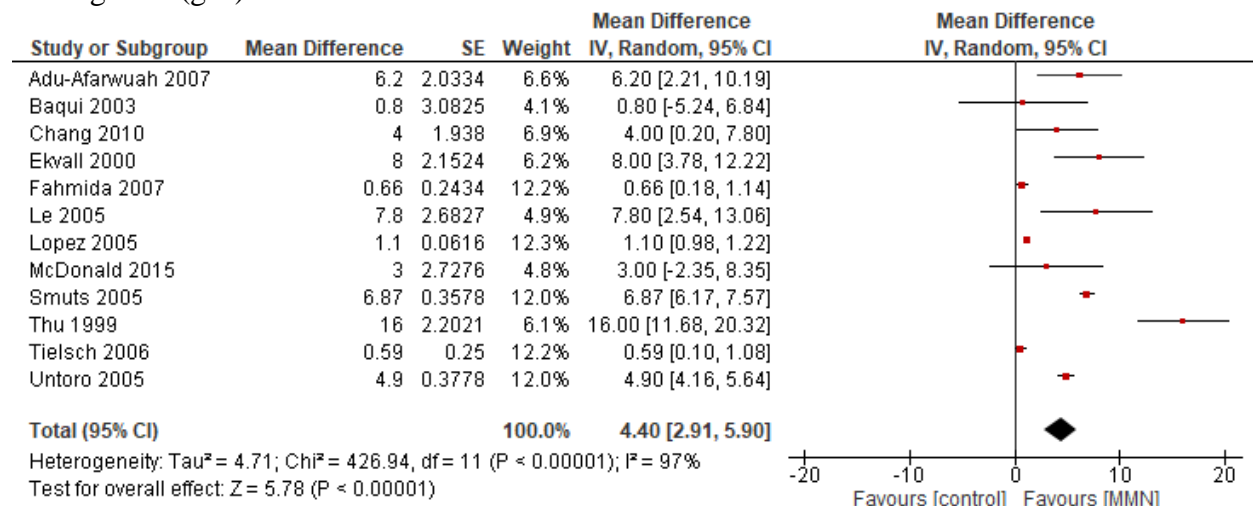

## Plasma/serum ferritin ( $\mu\text{g/L}$ )

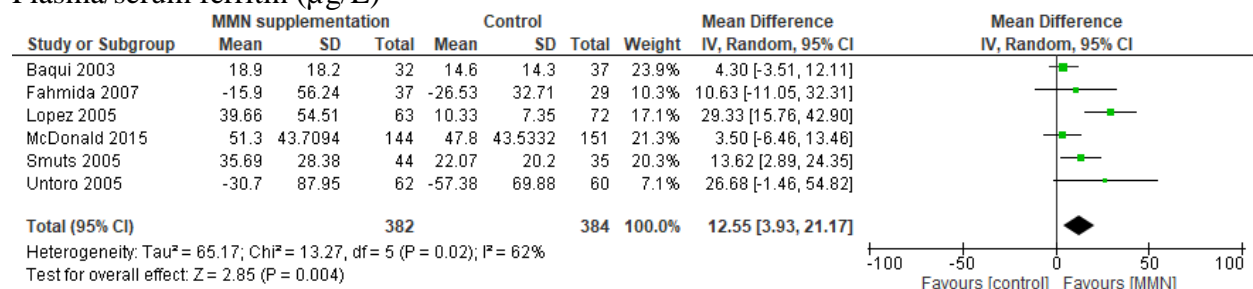

## Plasma/serum retinol ( $\mu\text{mol/L}$ )

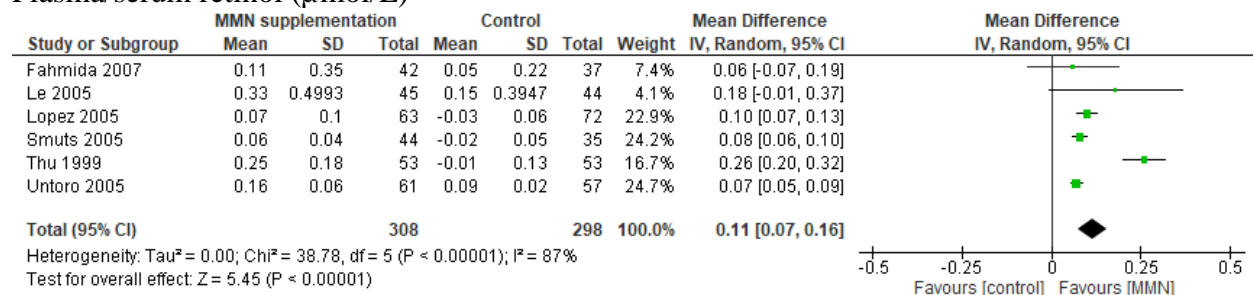

## Plasma/serum zinc ( $\mu\text{mol/L}$ )

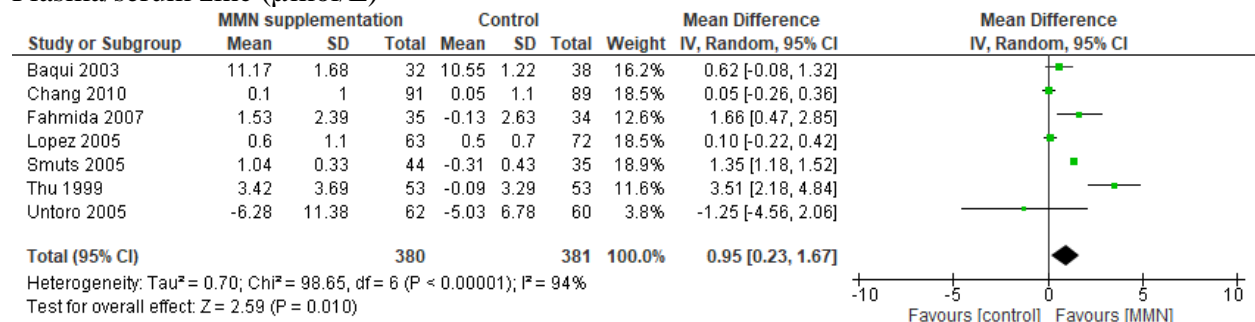

## Plasma/serum TfR (log) (mg/L)

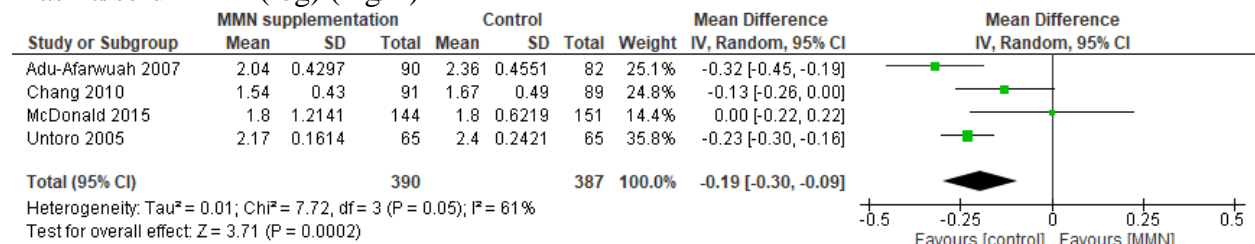

## Iron deficiency (plasma/serum ferritin $<12\mu\text{g/L}$ )

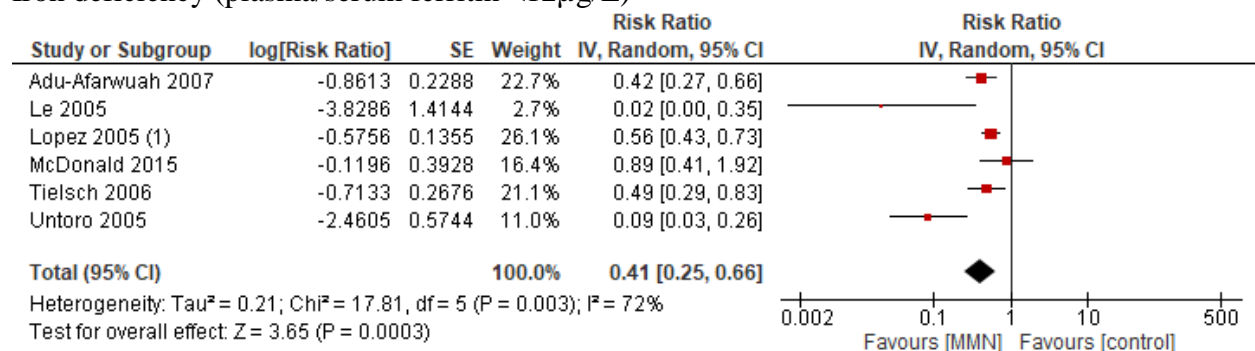

### Footnotes

(1) Plasma ferritin  $<20 \mu\text{g/L}$

## Vitamin A deficiency (plasma/serum retinol $<0.7\mu\text{mol/L}$ )

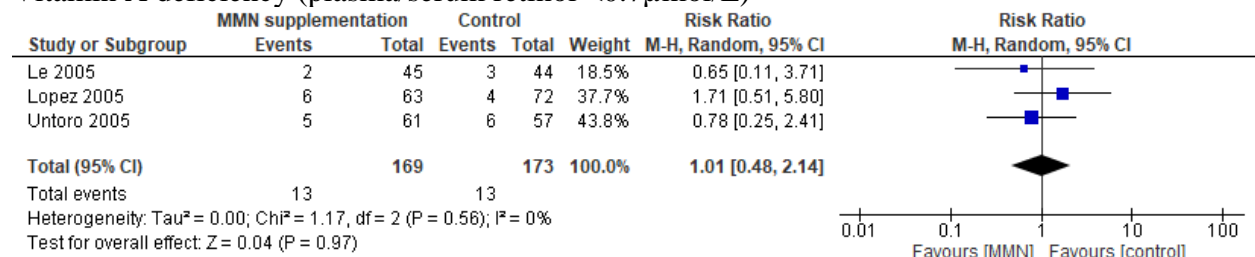

## Zinc deficiency (plasma zinc <10.7μmol/L)

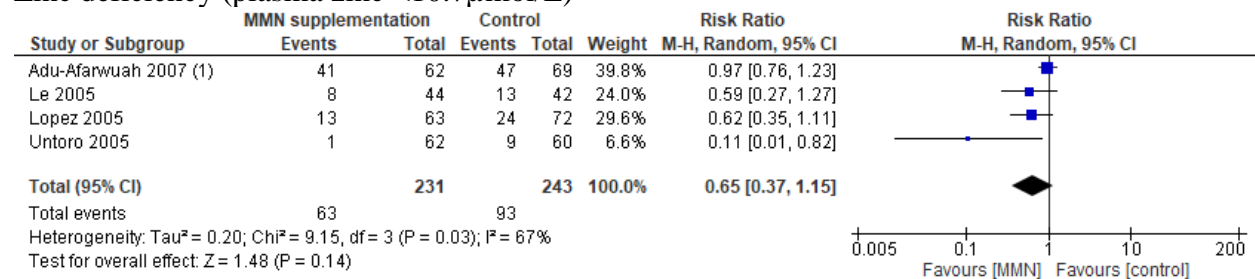

### Footnotes

(1) plasma zinc <9.9μmol/L

## Diarrhea (incidence)

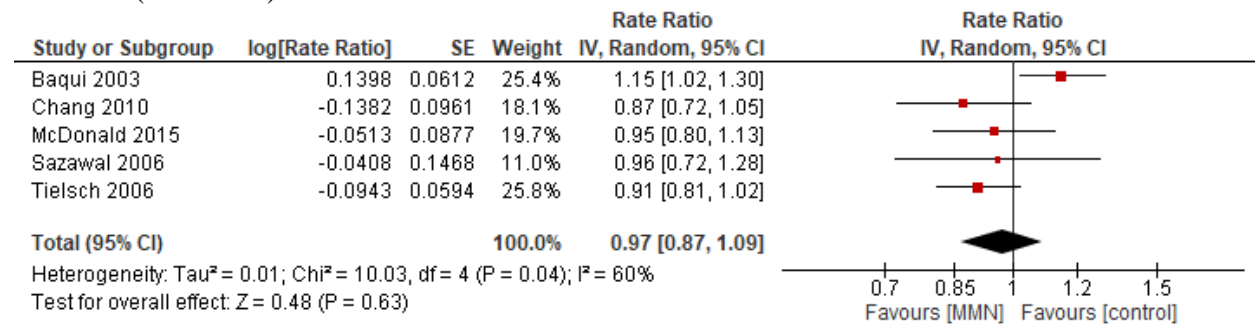

## Comparison 5: Subgroup Analyses for MMN Supplementation vs. Placebo/No Intervention (Efficacy)

### Anemia: WHO region

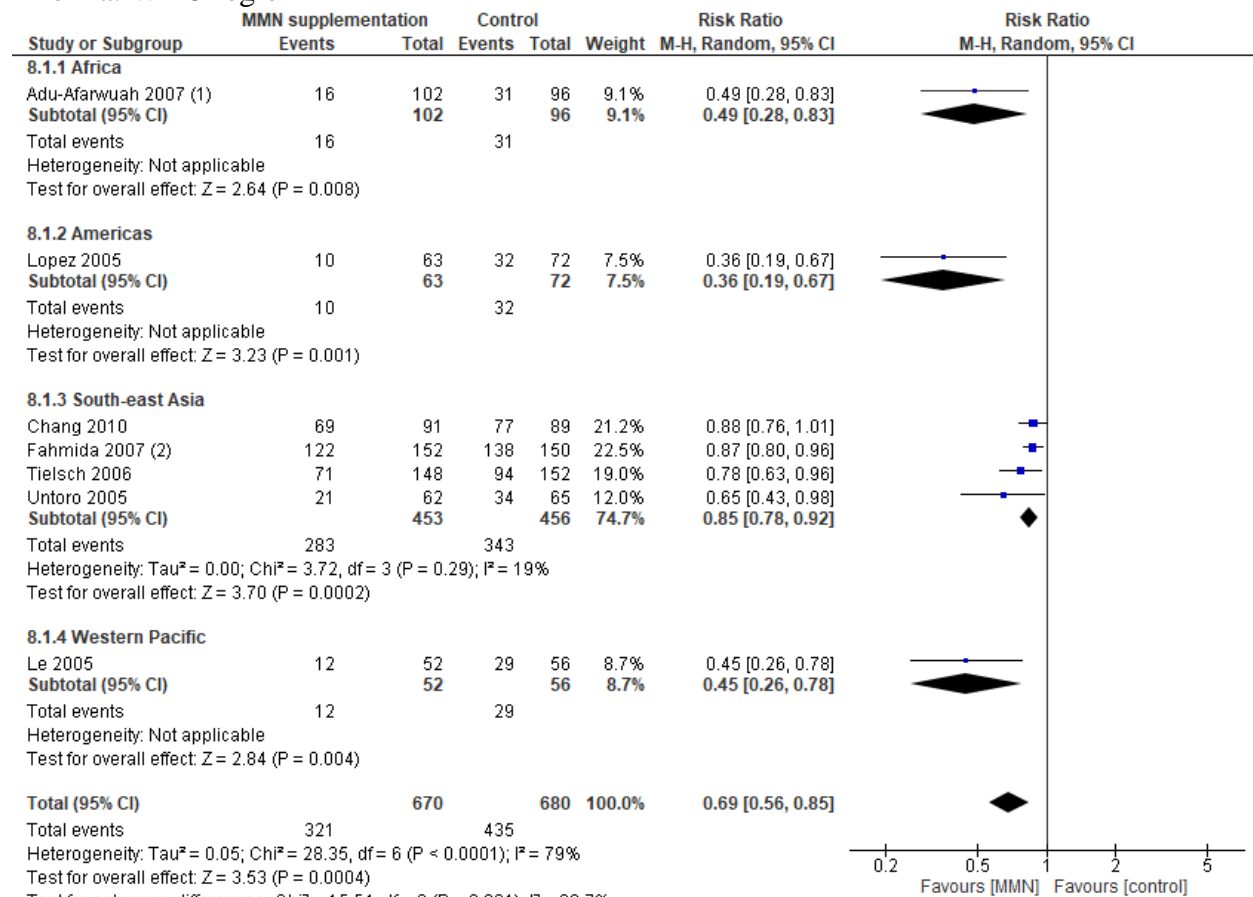

#### Footnotes

(1) Hemoglobin concentration <100g/L

(2) Hemoglobin concentration <100g/L

## Anemia: mean age at baseline

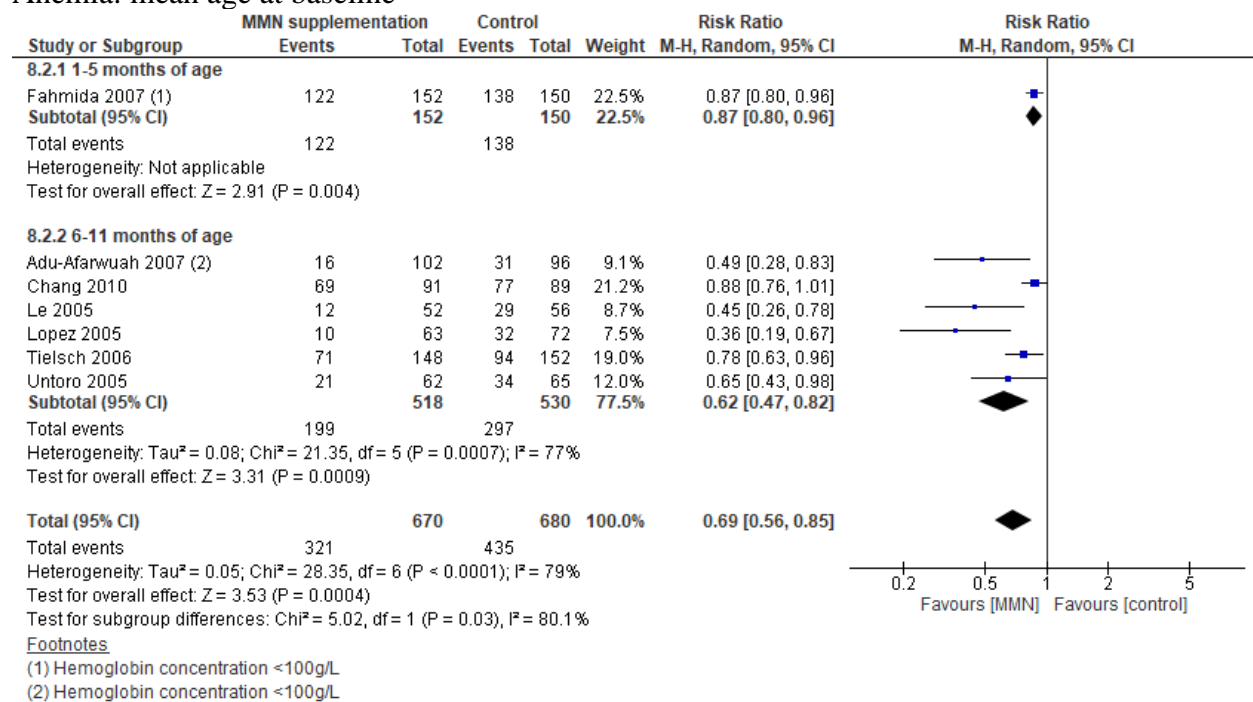

## Anemia: intervention duration

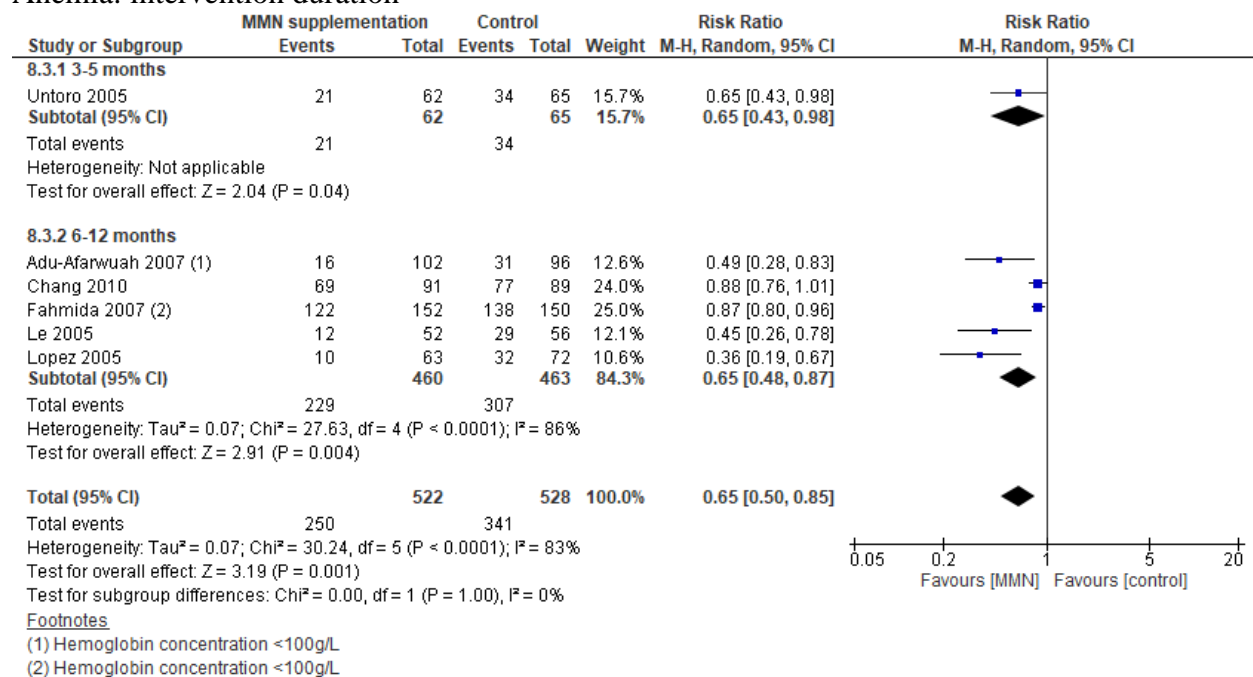

## Anemia: intervention frequency

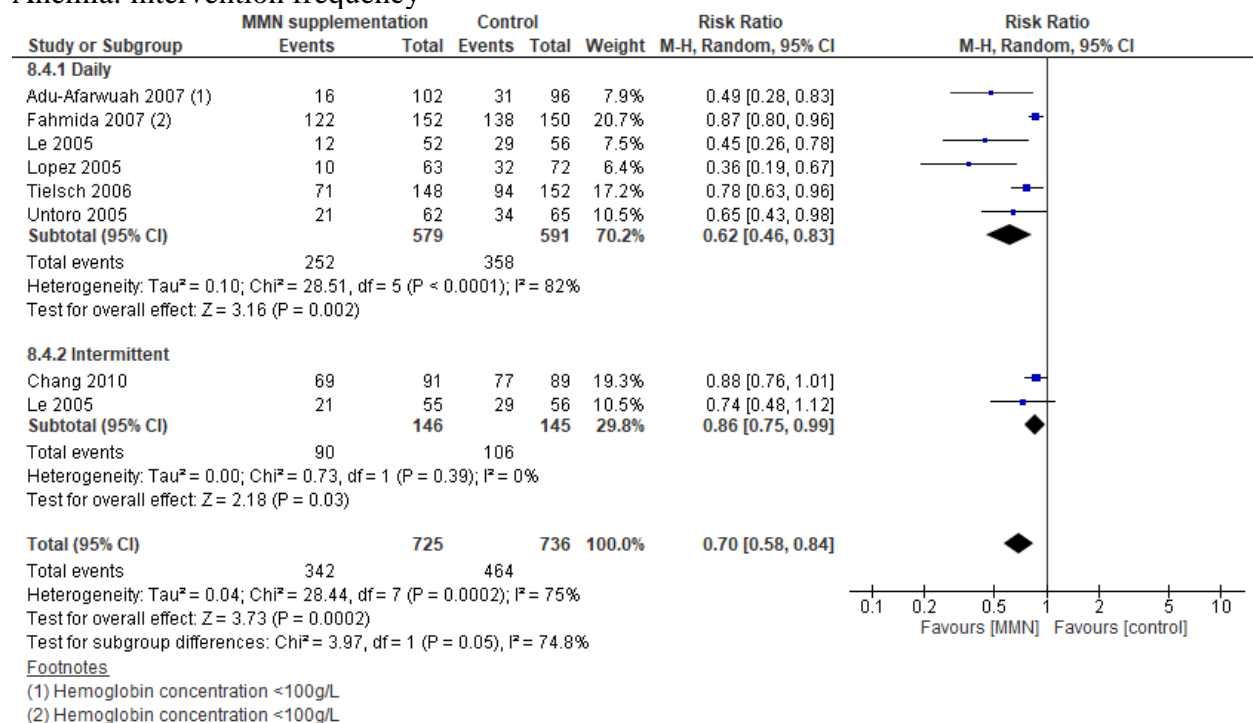

## Comparison 6: Micronutrient powders vs. Placebo/No Intervention (Efficacy)

### Stunting

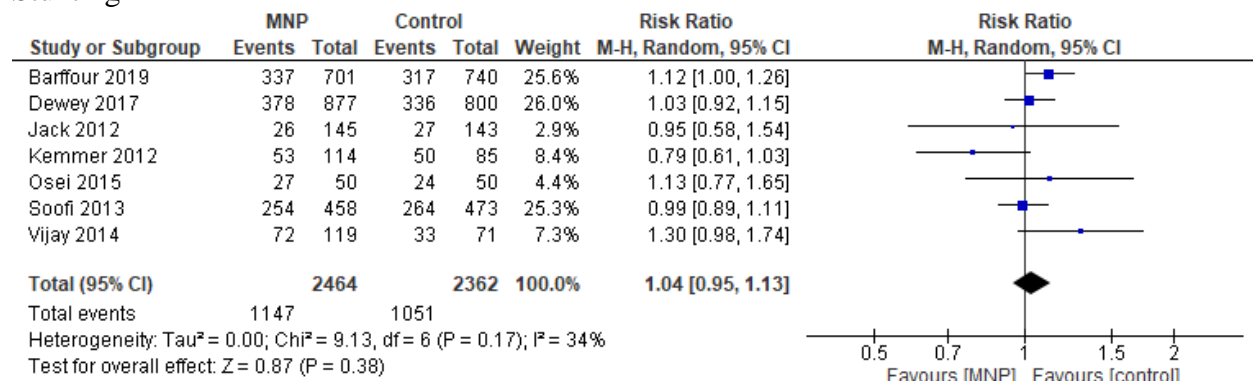

### Underweight

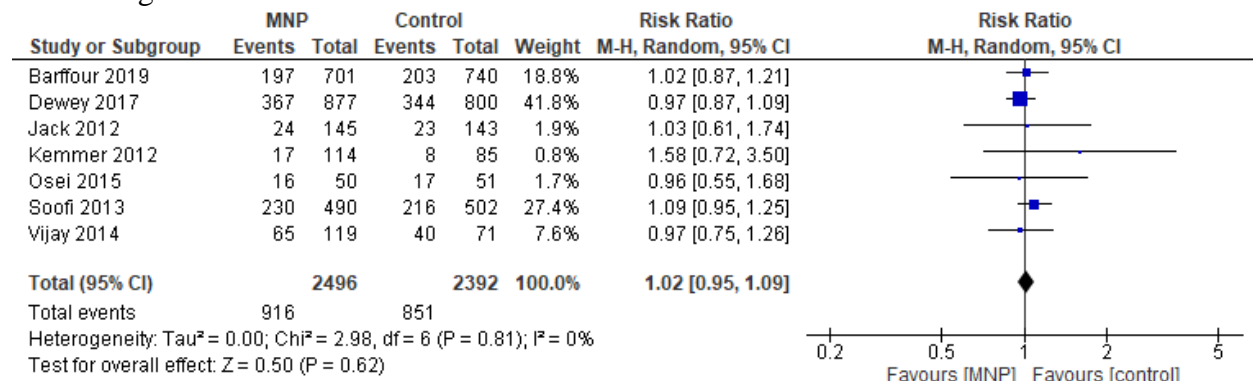

## Wasting

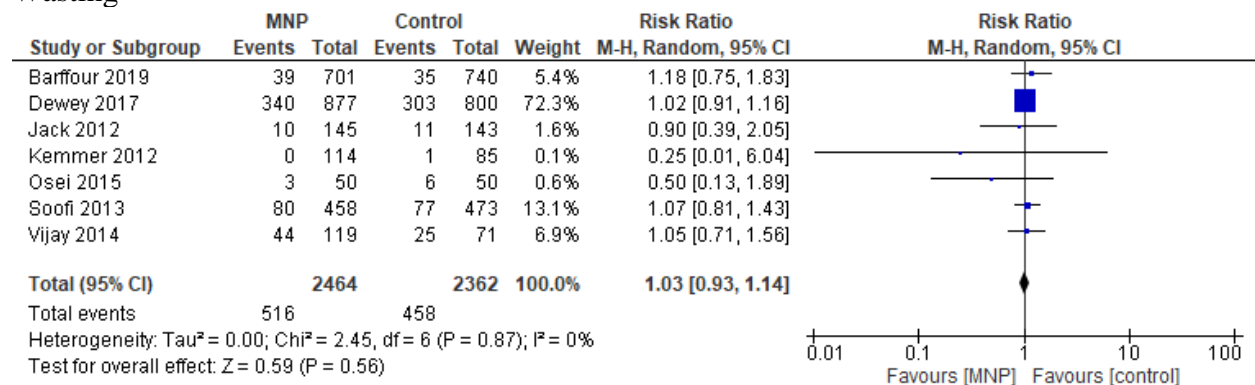

## Weight (kg)

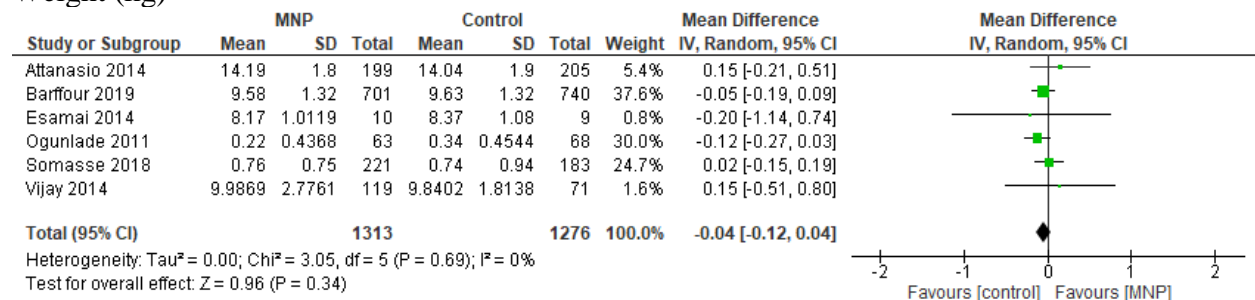

## Height (cm)

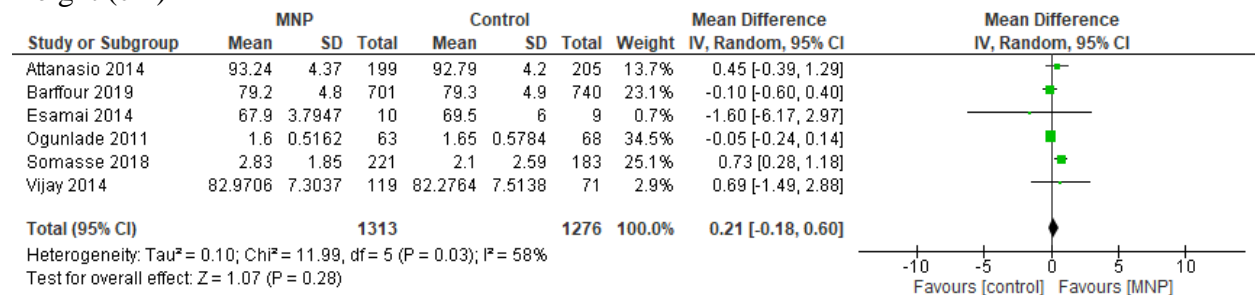

## Length-for-age (z-score)

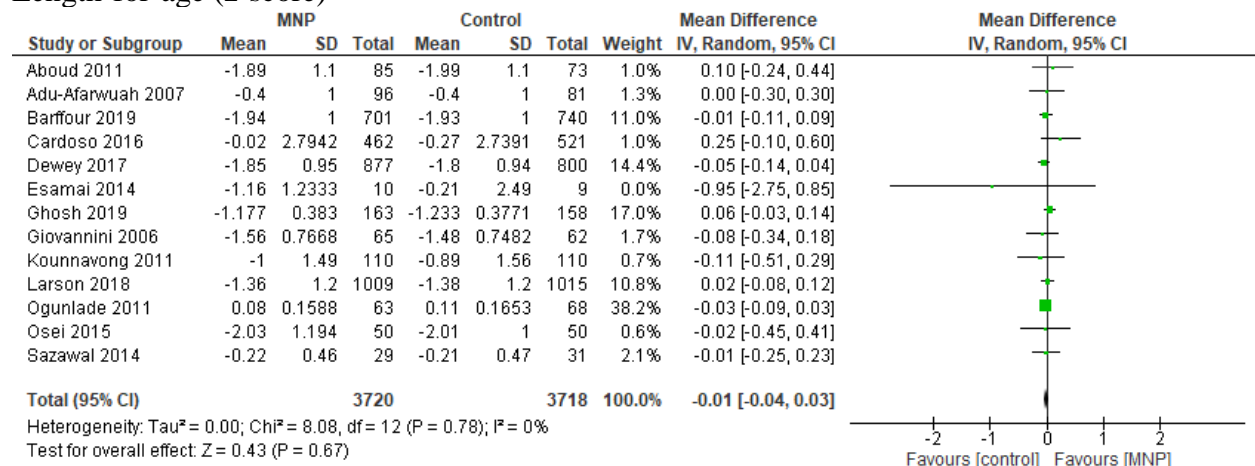



## Weight-for-age (z-score)

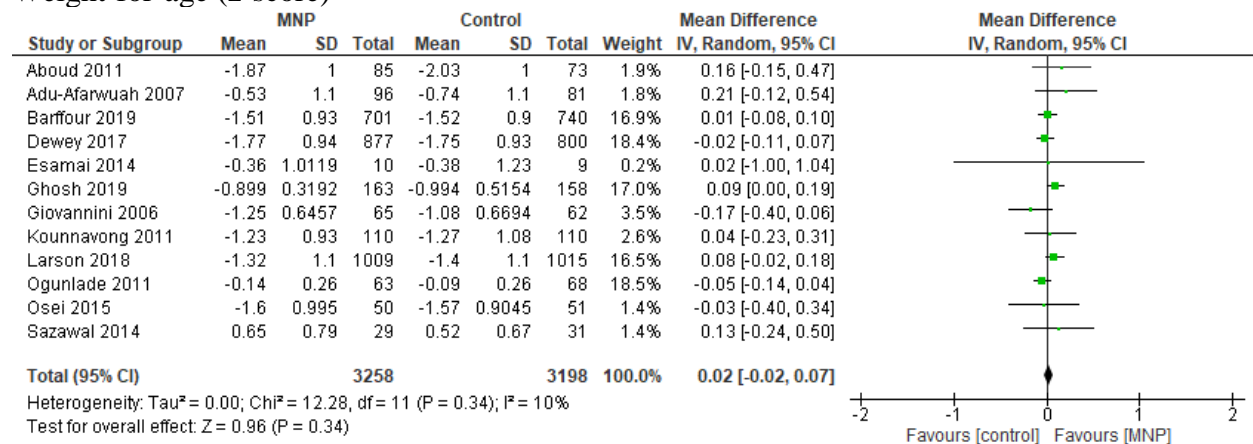

## Weight-for-height (z-score)

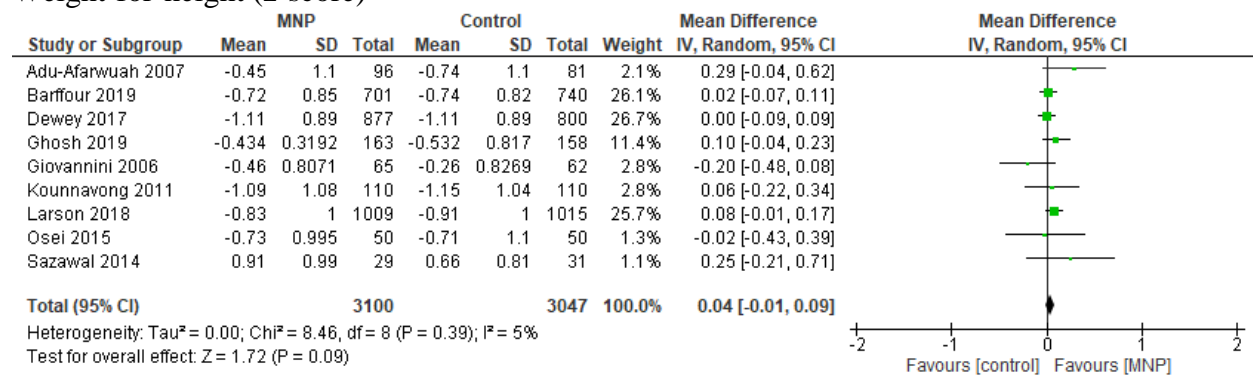

## Hemoglobin (g/L)

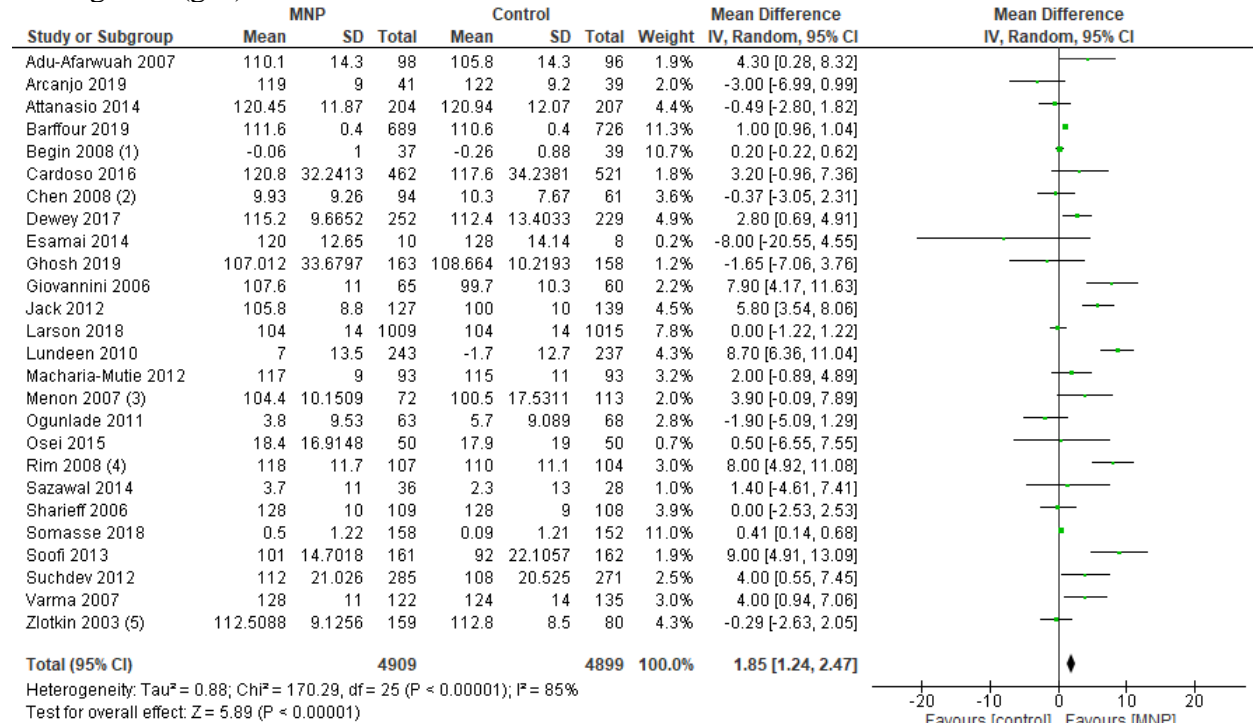

### Footnotes

- (1) Both groups received whey protein concentrate.
- (2) MMN (with vitamin A) versus vitamin A-fortified seasoning powder
- (3) Both groups received iron-fortified wheat-soy blend.
- (4) MNP contains iron only
- (5) MNP contains iron alone or iron + vitamin A

## Serum/plasma ferritin (µg/L)

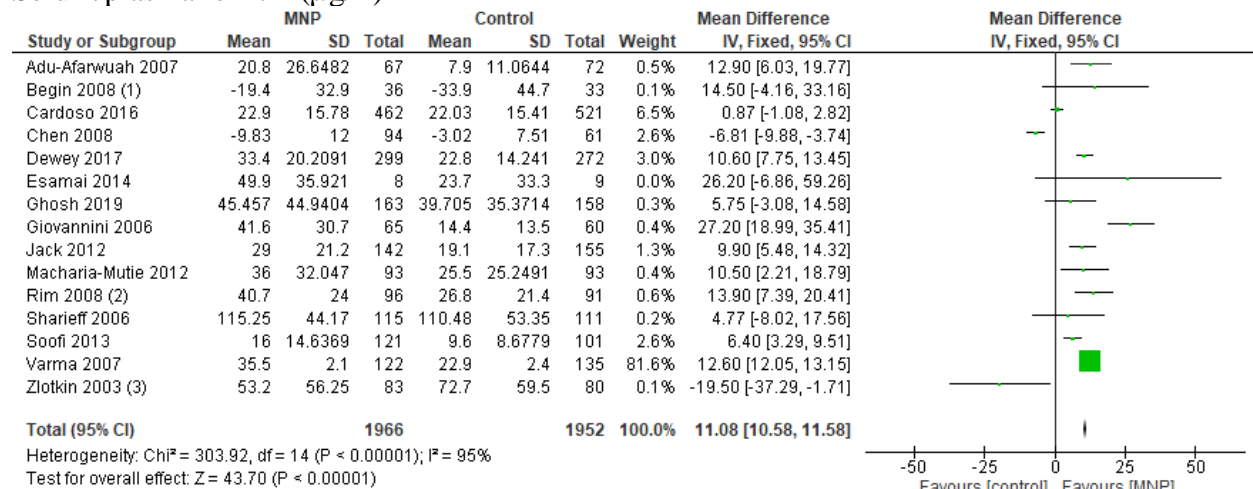

### Footnotes

- (1) Both groups received whey protein concentrate.
- (2) MNP fortified with iron only (intervention)
- (3) MNP fortified with iron and vitamin A only

## Plasma/serum TfR (mg/L)

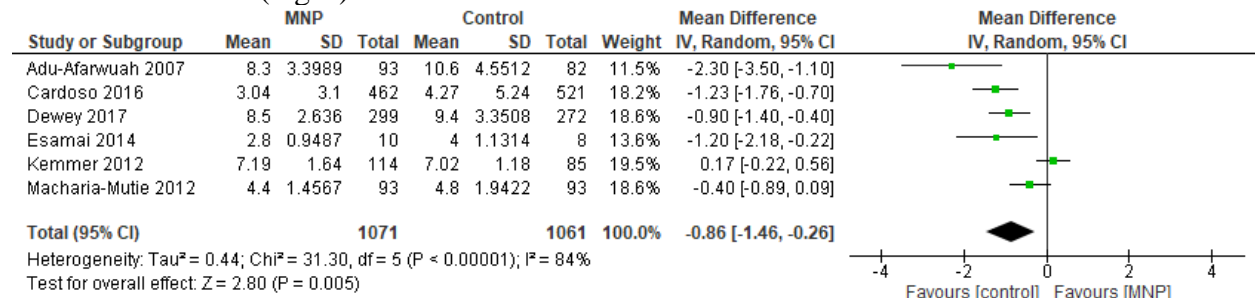

## Serum/plasma zinc ( $\mu\text{g/dL}$ )

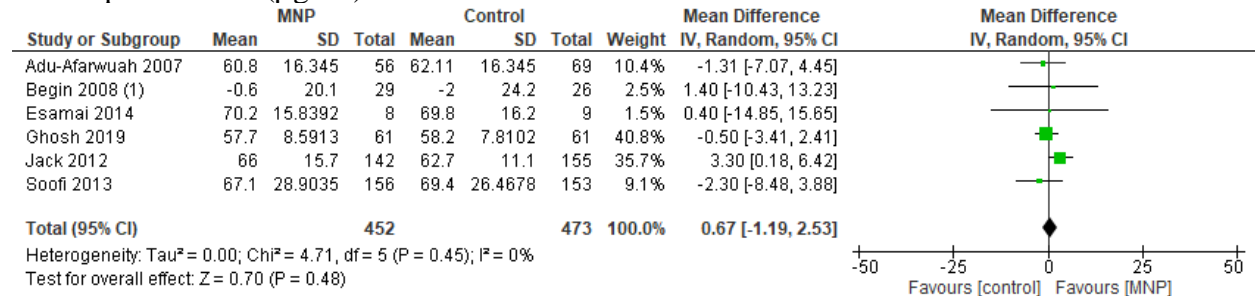

### Footnotes

(1) Both groups received whey protein concentrate.

## Serum retinol ( $\mu\text{g/dL}$ )

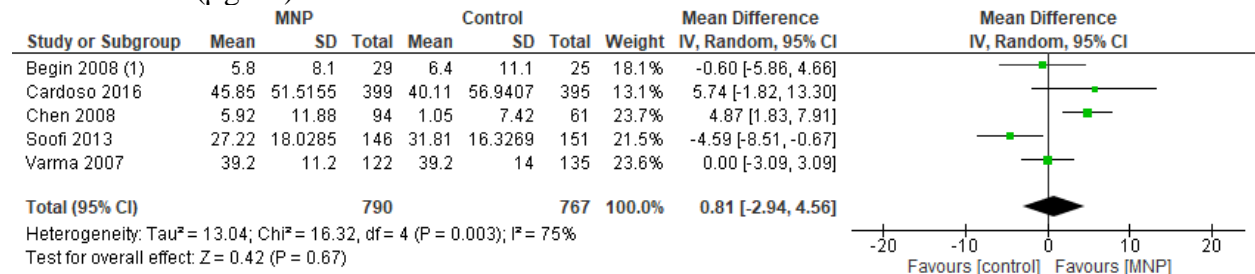

### Footnotes

(1) Both groups received whey protein concentrate.

## Iron deficiency

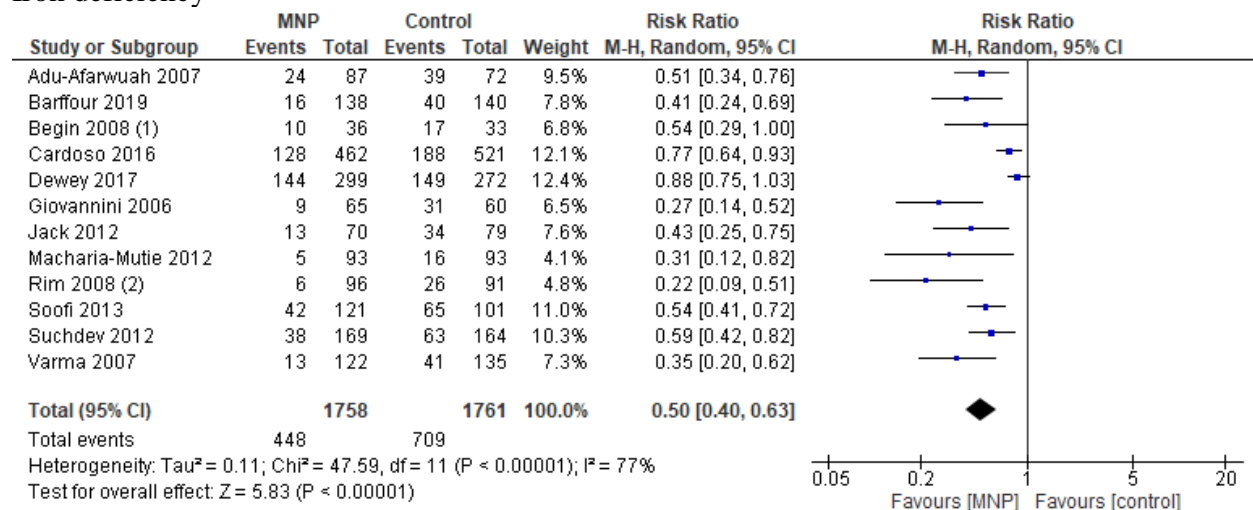

### Footnotes

(1) Both groups received whey protein concentrate.

(2) MNP contains iron only

## Iron-deficiency anemia

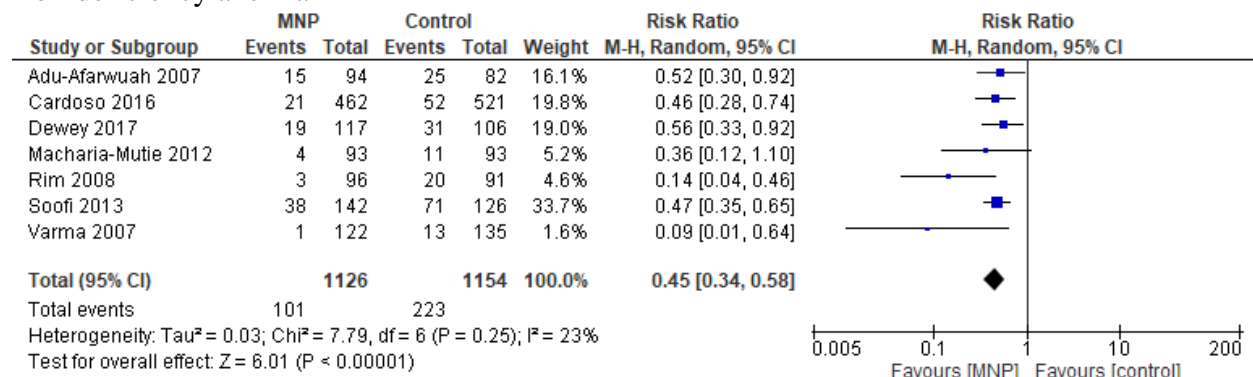

## Zinc deficiency

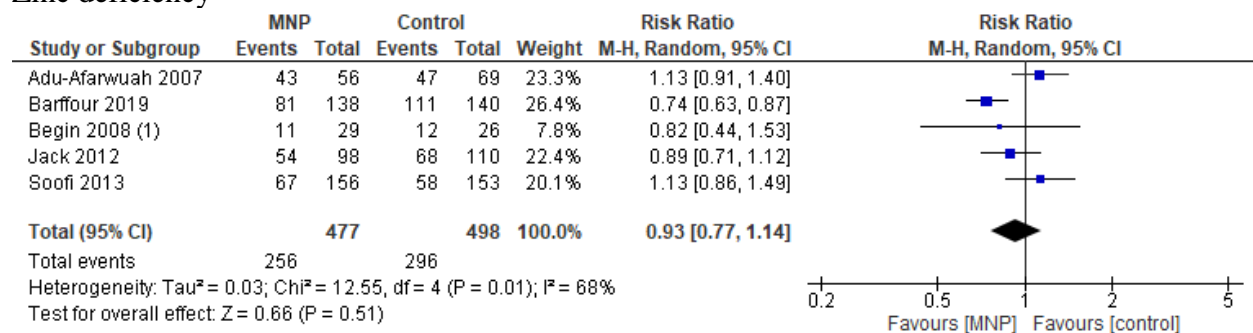

### Footnotes

(1) Both groups received whey protein concentrate.

## Vitamin A deficiency

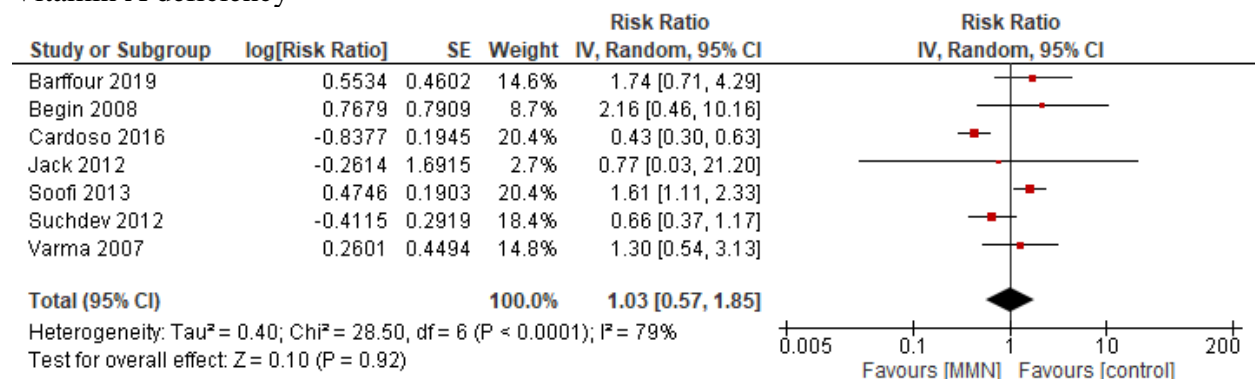

## Diarrhea (prevalence)

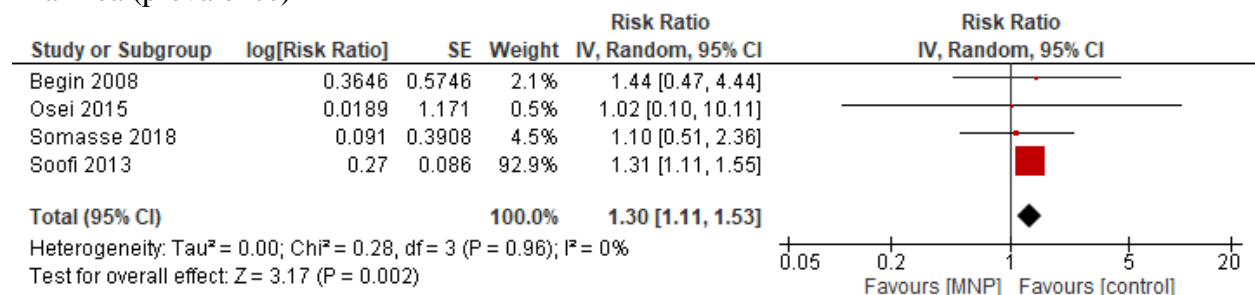

## Cognitive function

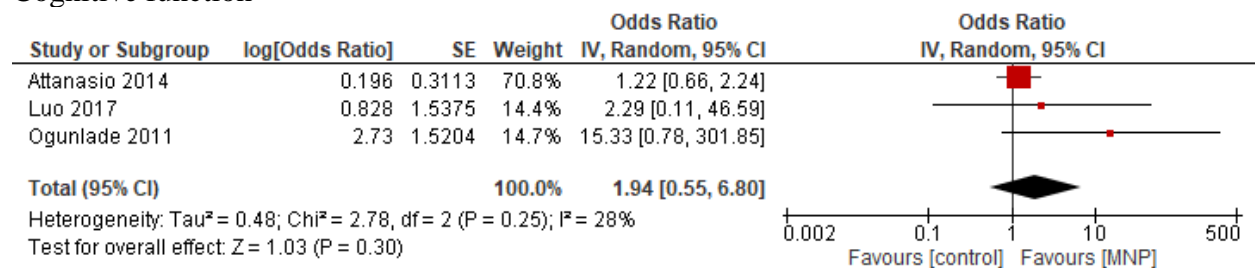

## Comparison 6: Subgroup Analyses for Micronutrient Powders vs. Placebo/No Intervention (Efficacy)

### Anemia: WHO region

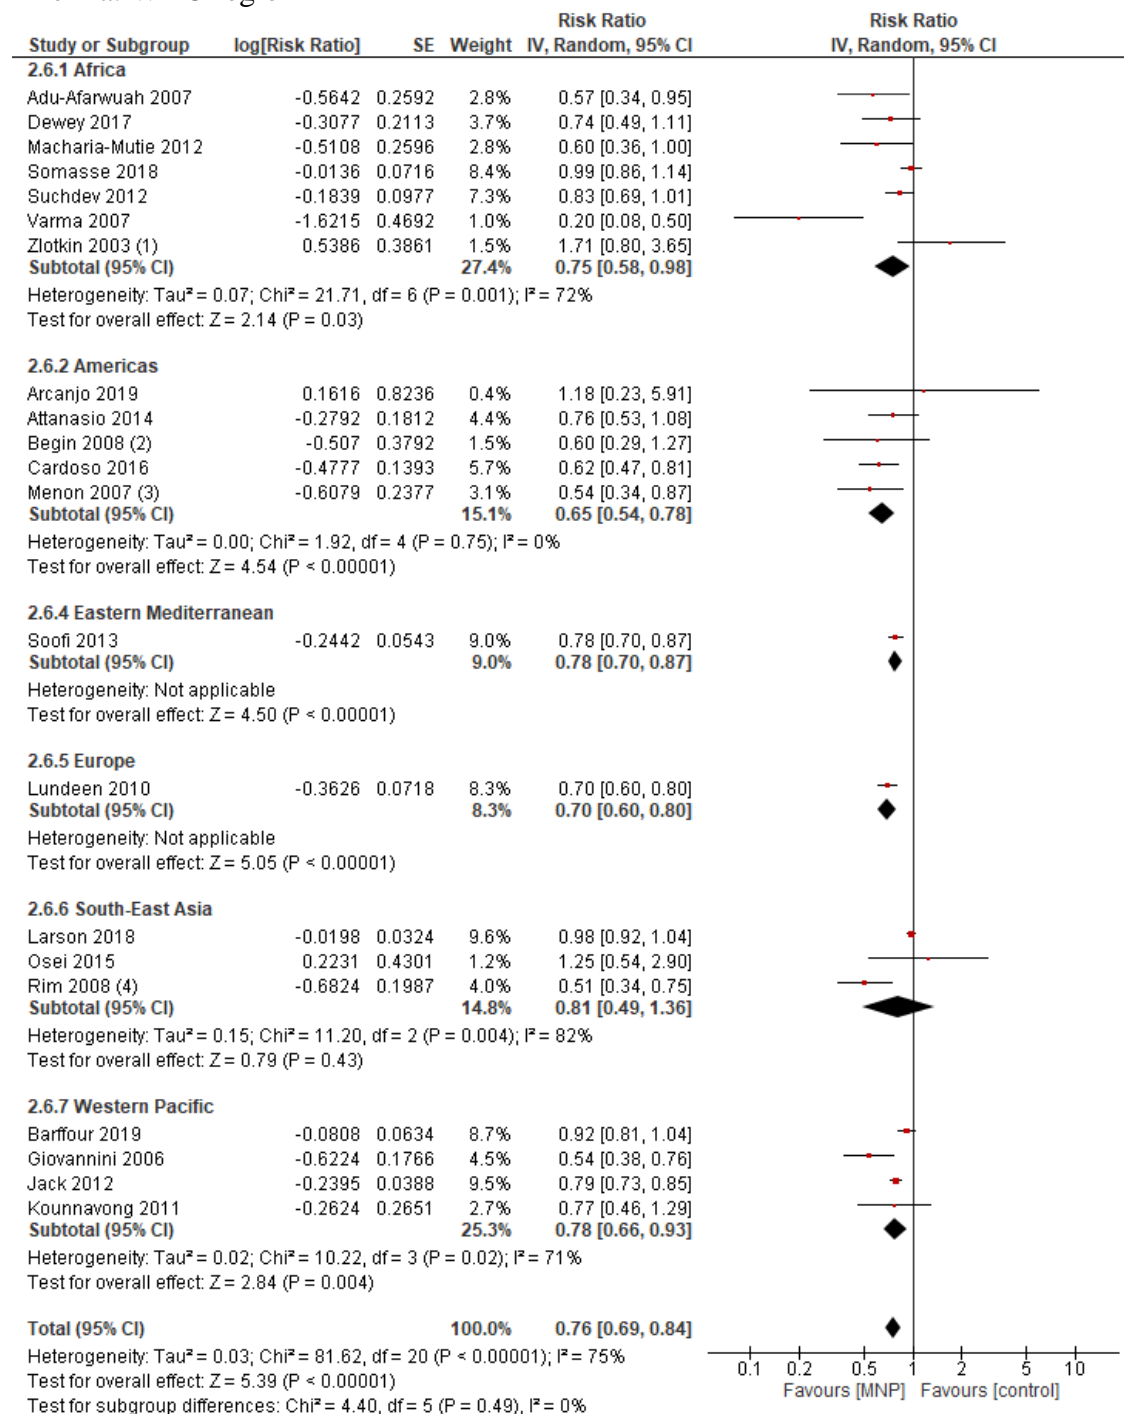

#### Footnotes

- (1) MNP contains iron & vitamin A only
- (2) Both groups received whey protein concentrate
- (3) Both groups received iron fortified wheat soy blend
- (4) MNP contains iron only

## Anemia: mean age at baseline

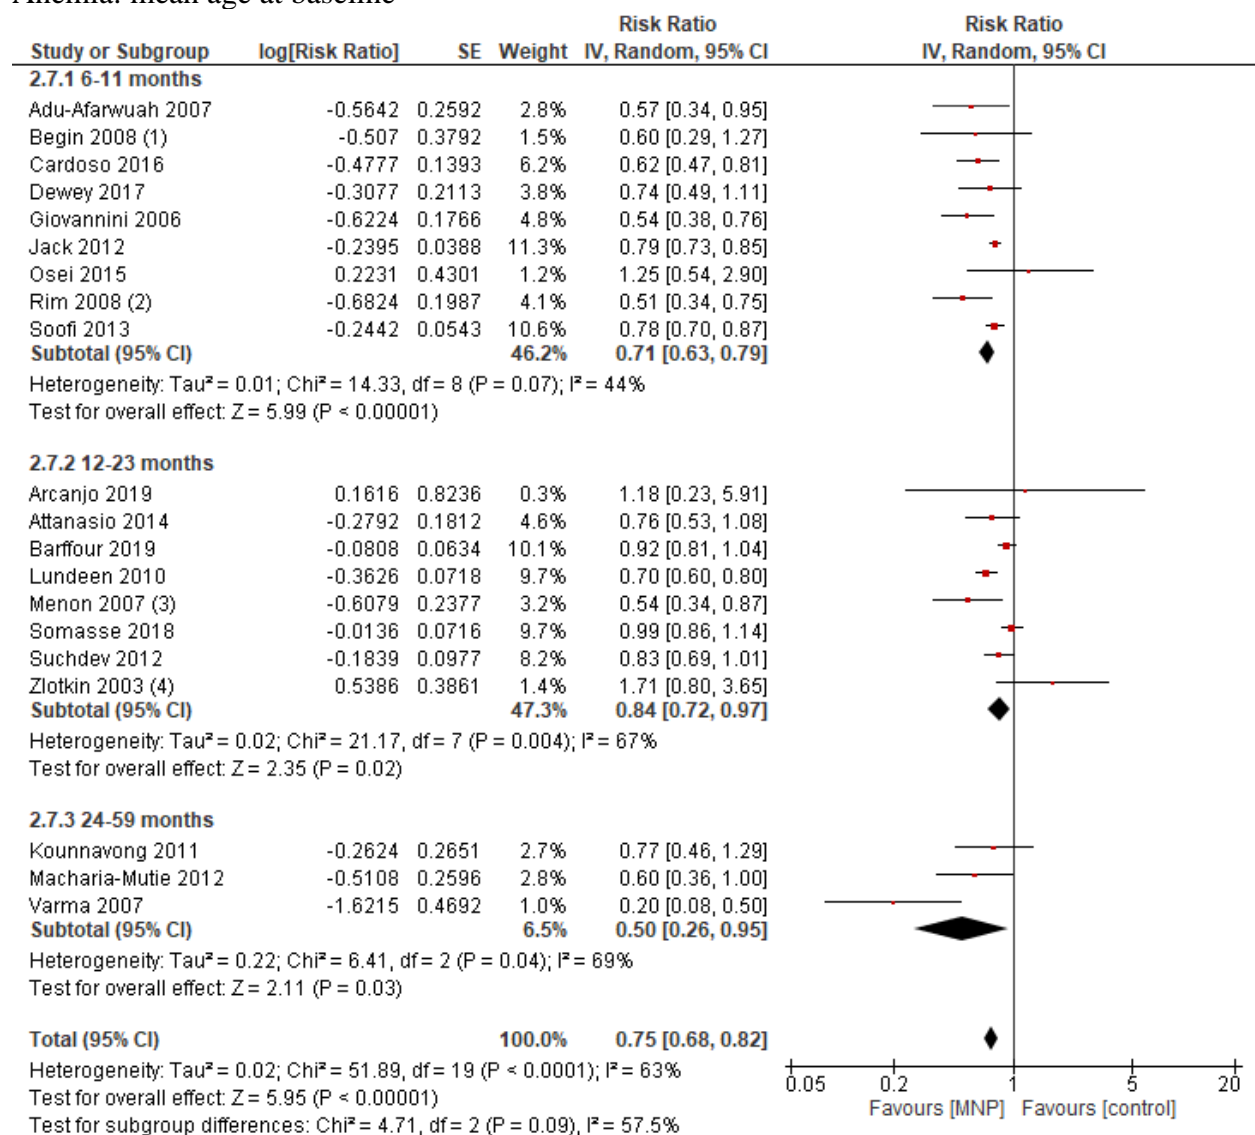

### Footnotes

- (1) Both groups received why protein concentrate
- (2) MNP contains iron only
- (3) Both groups received iron fortified wheat soy blend
- (4) MNP contains iron & vitamin A only

## Anemia: intervention duration

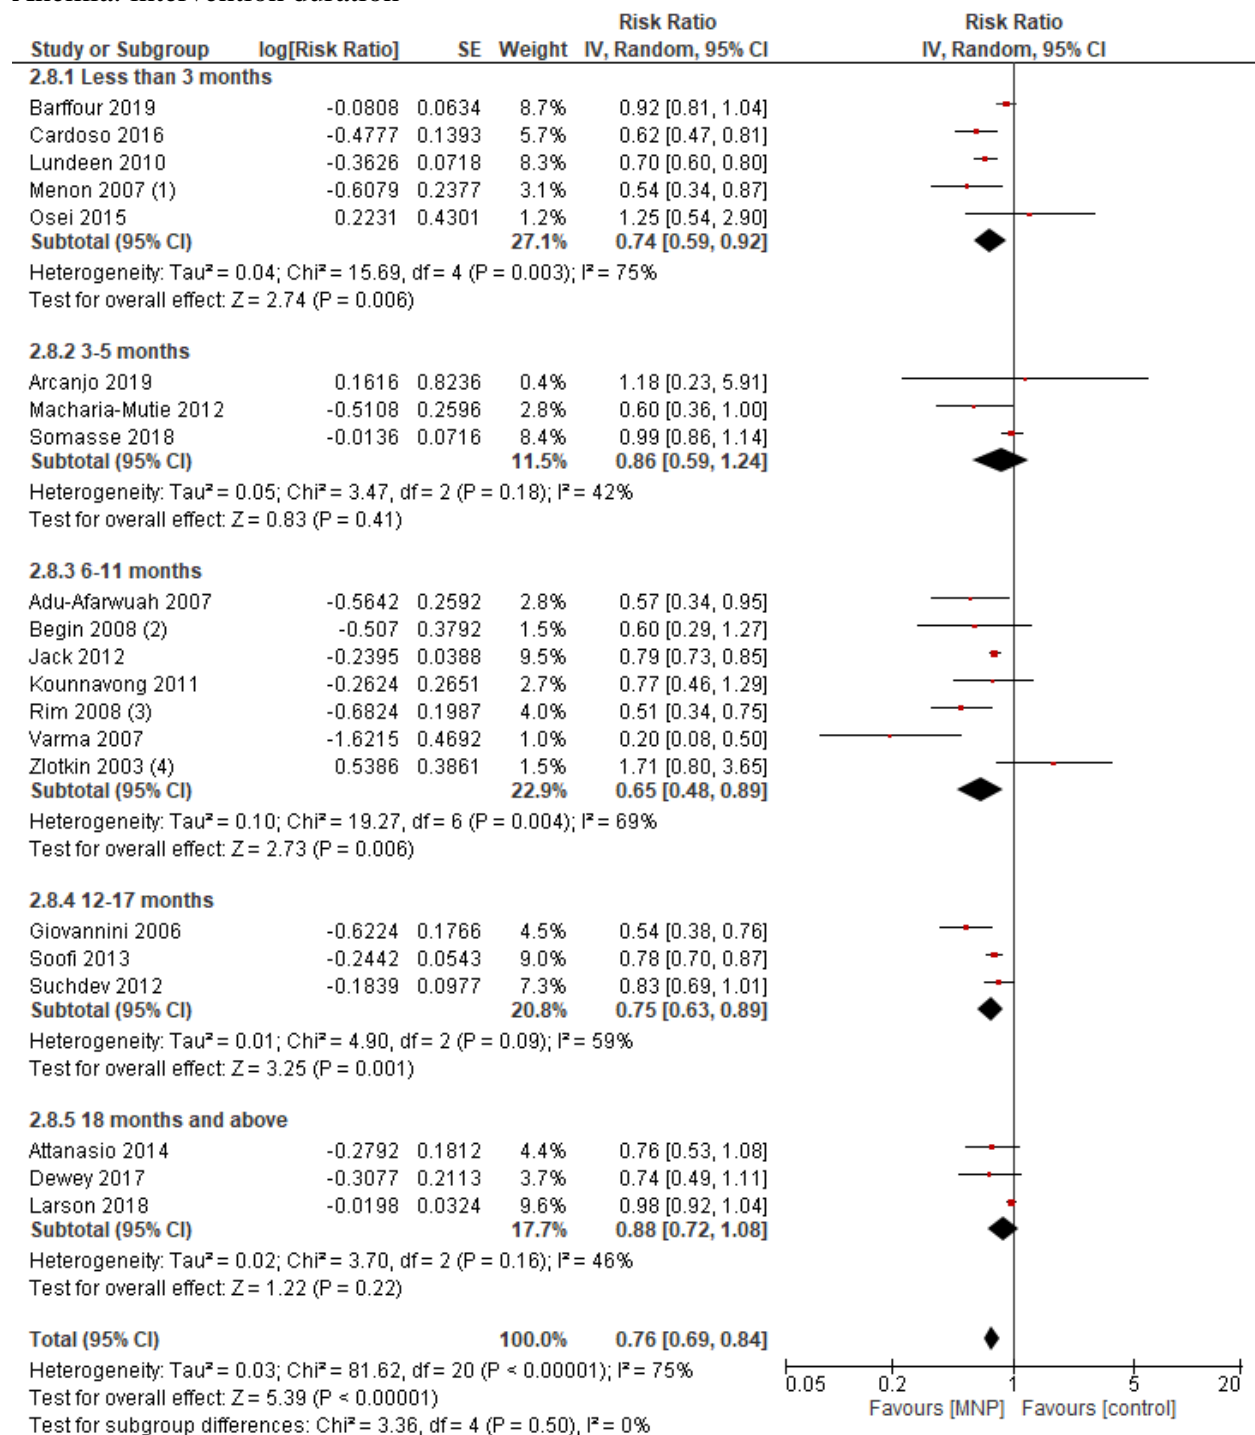

### Footnotes

(1) Both groups received iron fortified wheat soy blend

(2) Both groups received whey protein concentrate

(3) MNP contains iron only

(4) MNP contains iron & vitamin A only



## Anemia: intervention frequency

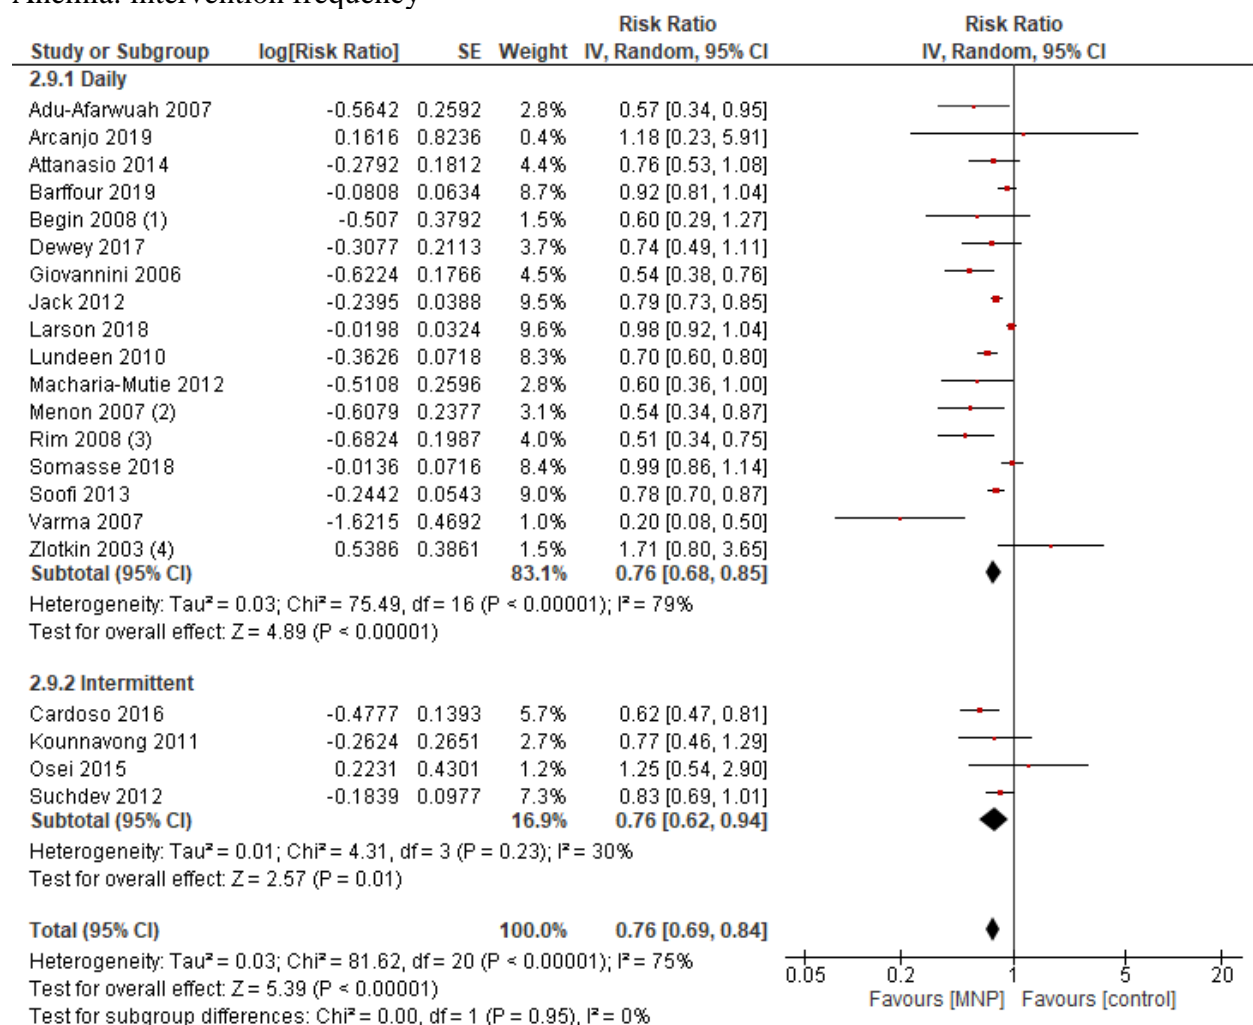

### Footnotes

- (1) Both groups received why protein concentrate
- (2) Both groups received iron fortified wheat soy blend
- (3) MNP contains iron only
- (4) MNP contains iron & vitamin A only

## Anemia: nutritional status at baseline (anemic vs. non-anemic)

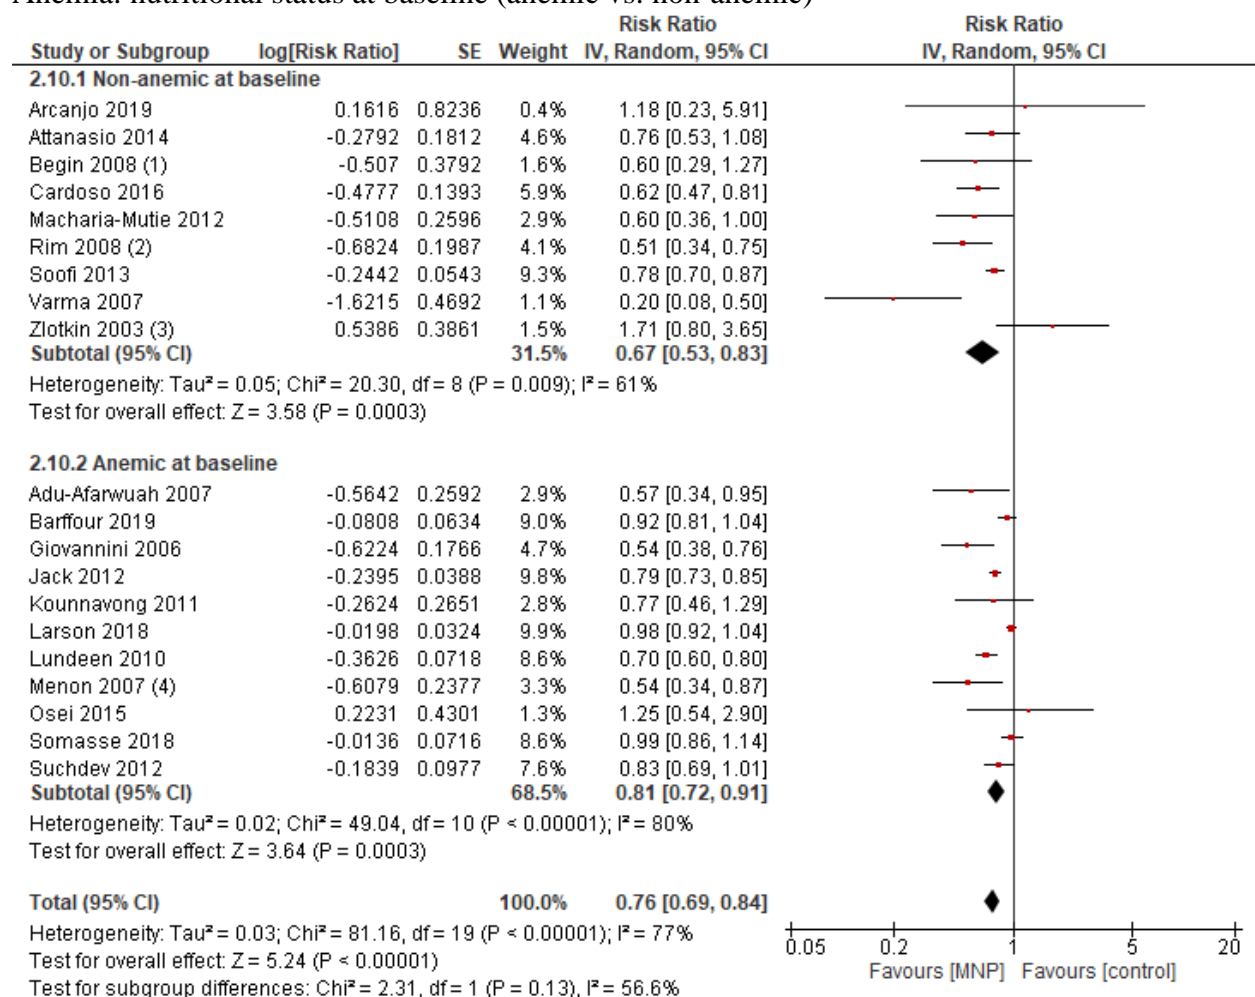

### Footnotes

(1) Both groups received why protein concentrate

(2) MNP contains iron only

(3) MNP contains iron & vitamin A only

(4) Both groups received iron fortified wheat soy blend

## Comparison 7: Lipid-based Nutrient Supplementation vs. Placebo/No Intervention (Efficacy)

### Wasting

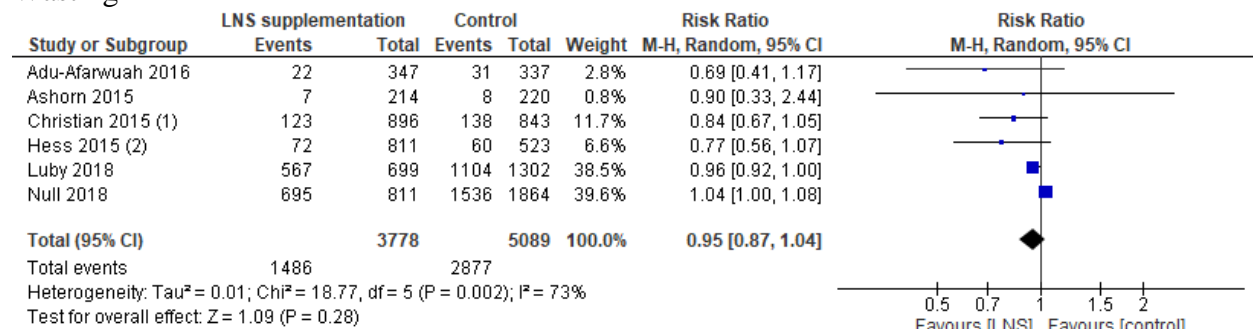

#### Footnotes

(1) Plumpy'doz group only

(2) LNS (Zn 5mg) and LNS (Zn 10mg) groups were combined into one group

### Underweight

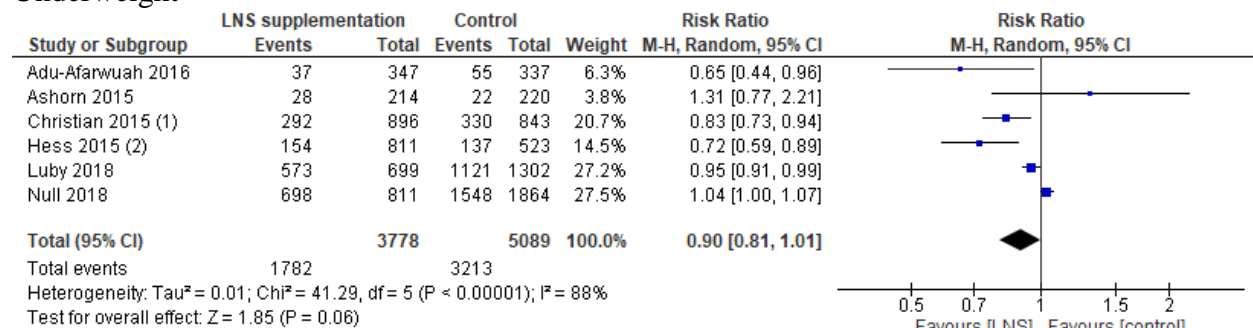

#### Footnotes

(1) Plumpy'doz group only

(2) LNS (Zn 5mg) and LNS (Zn 10mg) groups were combined into one group

### Height (cm)

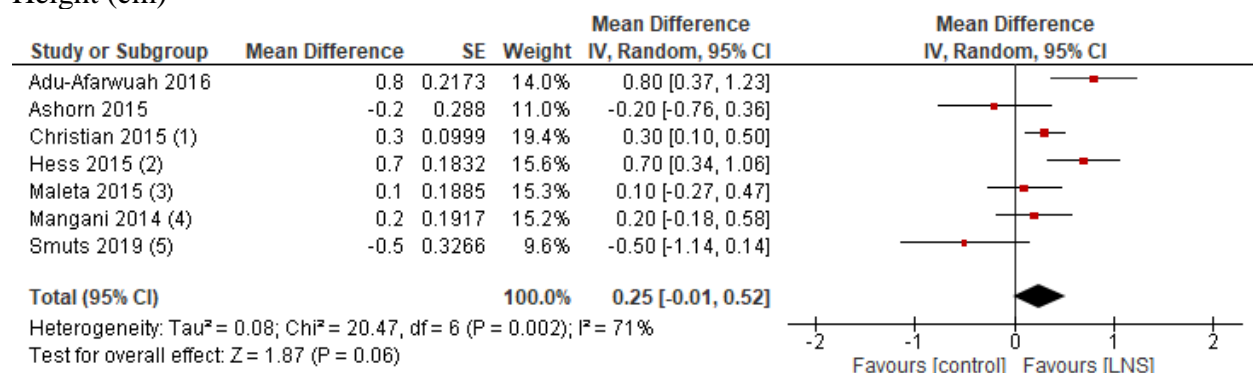

#### Footnotes

(1) Plumpy'doz group only

(2) LNS (Zn 5mg) and LNS (Zn 10mg) groups were combined into one group

(3) 20g LNS group only

(4) LNS (with milk) group only

(5) SQ LNS group only

## Weight (kg)

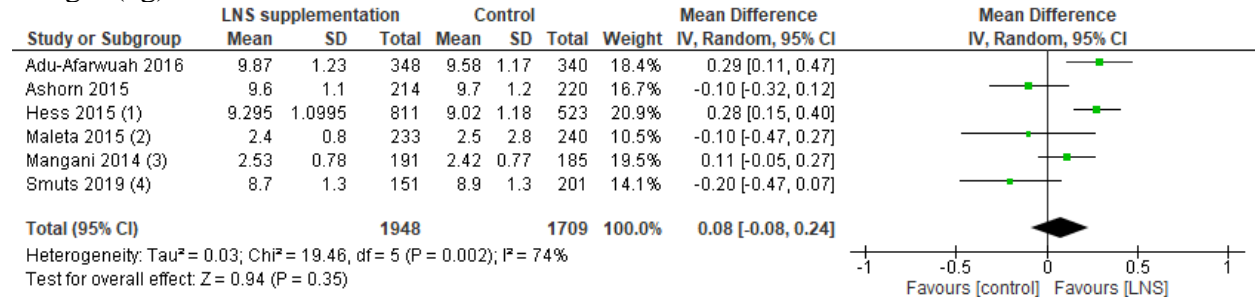

### Footnotes

- (1) LNS (Zn 5mg) and LNS (Zn 10mg) groups were combined into one group
- (2) 20g LNS group only
- (3) LNS (with milk) group only
- (4) SQ LNS group only

## Length-for-age (z-score)

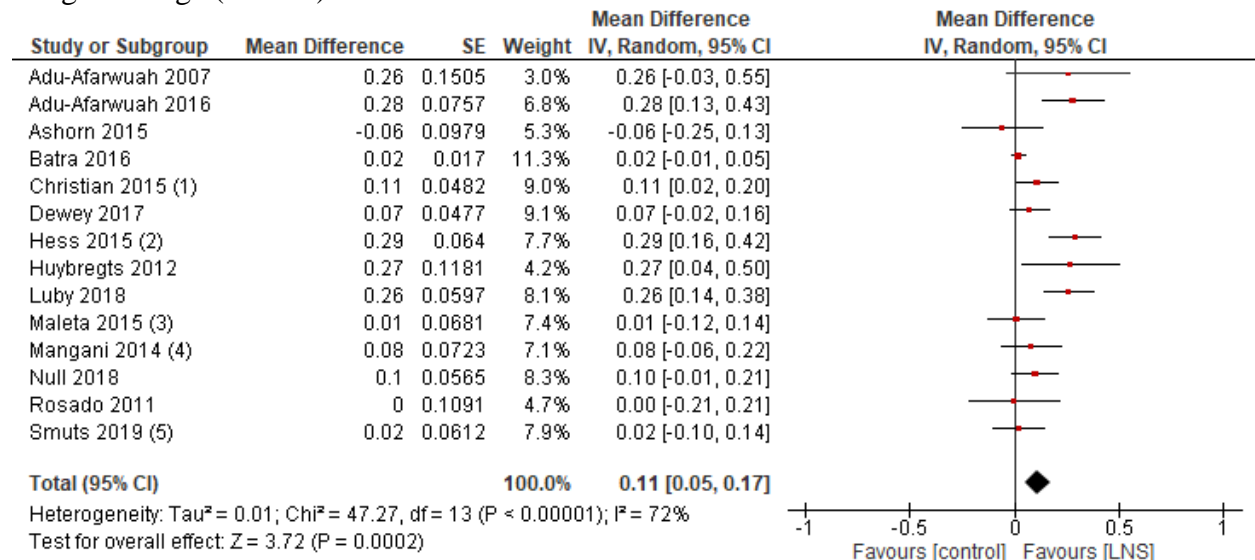

### Footnotes

- (1) Plumpy'doz group only
- (2) LNS (Zn 5mg) and LNS (Zn 10mg) groups were combined into one group
- (3) 20g LNS group only
- (4) LNS (with milk) group only
- (5) SQ LNS group only

## Weight-for-age (z-score)

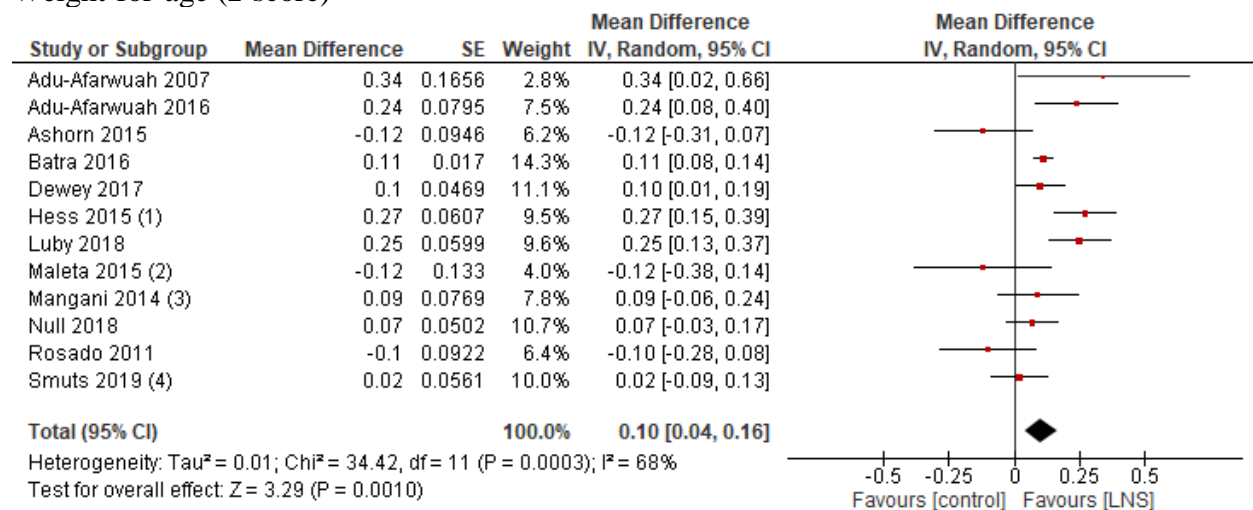

### Footnotes

- (1) LNS (Zn 5mg) and LNS (Zn 10mg) groups were combined into one group
- (2) 20g LNS group only
- (3) LNS (with milk) group only
- (4) SQ LNS group only

## Weight-for-height (z-score)

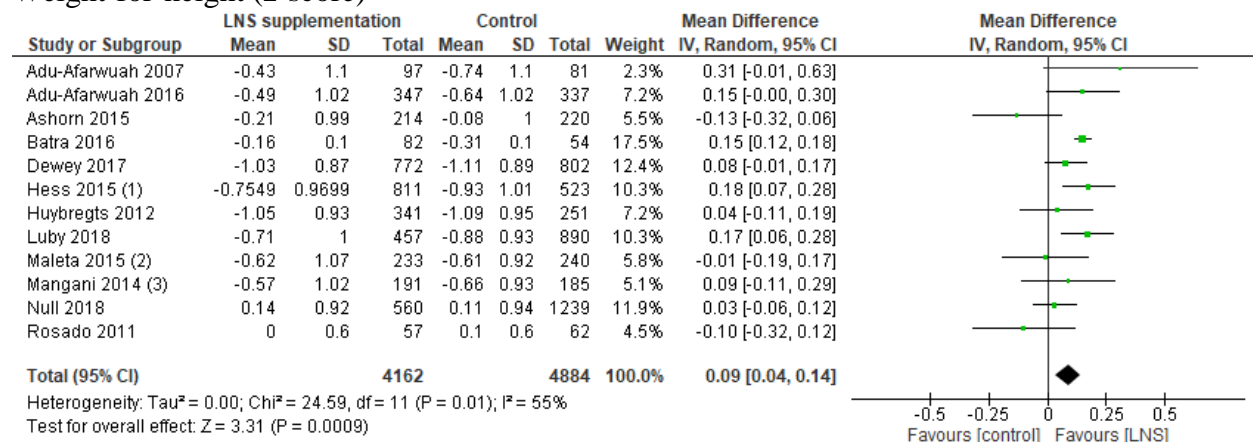

### Footnotes

- (1) LNS (Zn 5mg) and LNS (Zn 10mg) groups were combined into one group
- (2) 20g LNS group only
- (3) LNS (with milk) group only

## Hemoglobin (g/L)

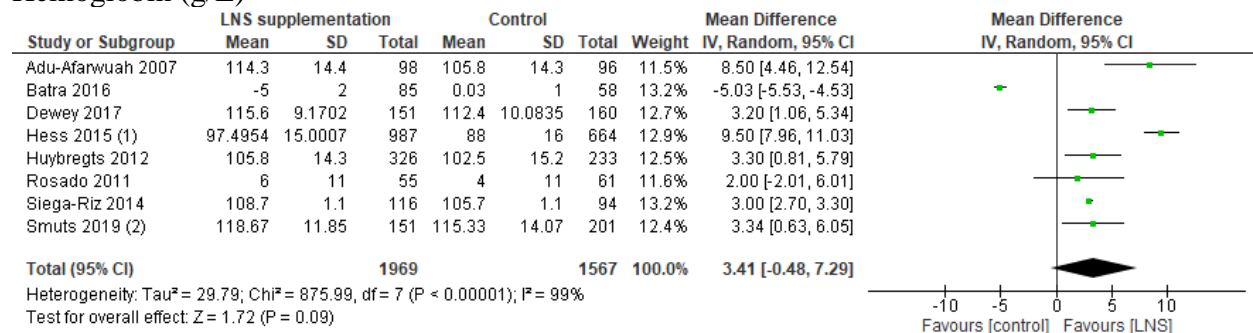

### Footnotes

(1) LNS (Zn 5mg) and LNS (Zn 10mg) groups were combined into one group

(2) SQ LNS group only

## Head circumference (cm)

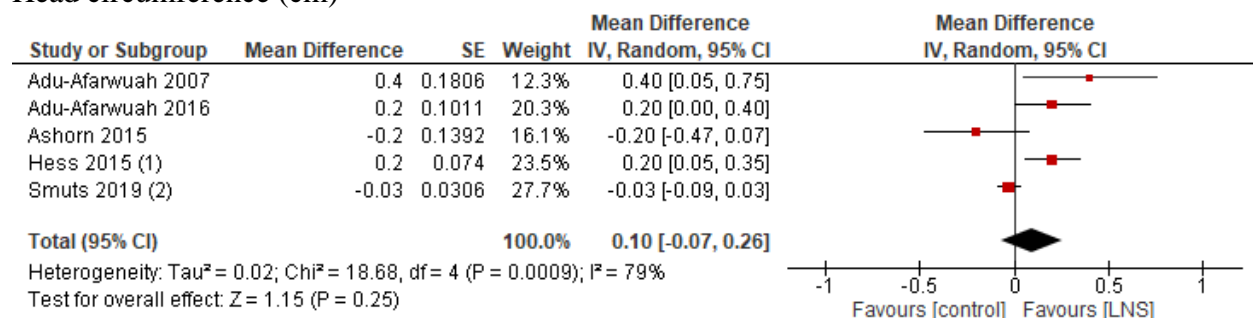

### Footnotes

(1) LNS (Zn 5mg) and LNS (Zn 10mg) groups were combined into one group

(2) SQ LNS group only

## Mid-upper arm circumference (cm)

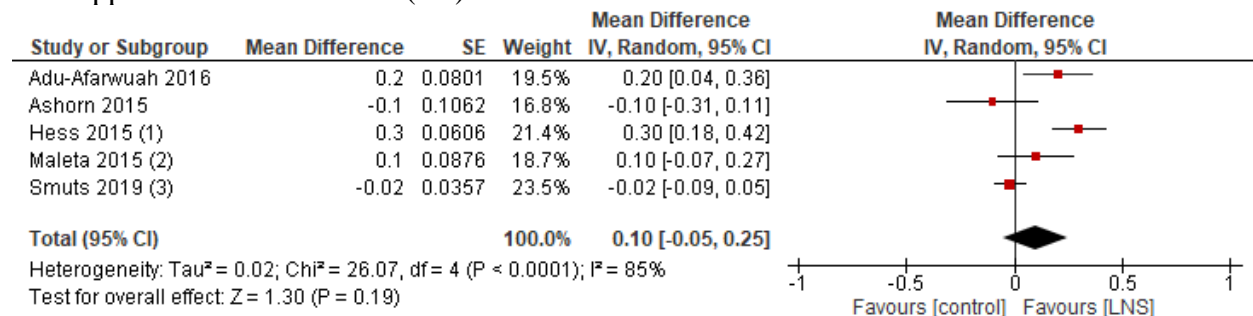

### Footnotes

(1) LNS (Zn 5mg) and LNS (Zn 10mg) groups were combined into one group

(2) 20g LNS group only

(3) SQ LNS group only

## Plasma/serum zinc (log) (µg/dL)

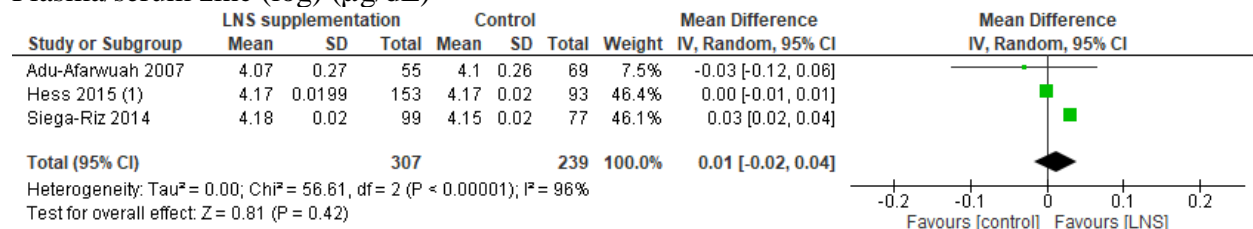

### Footnotes

(1) LNS (Zn 5mg) and LNS (Zn 10mg) groups were combined into one group

## Mental development (language)

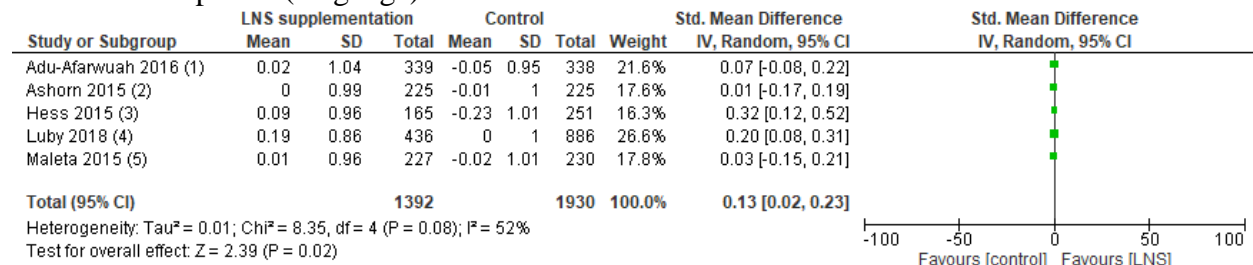

### Footnotes

- (1) Language (100-word vocabulary checklist based on the MacArthur-Bates Communicative Development Inventory)
- (2) Language (100-word vocabulary checklist based on the MacArthur-Bates Communicative Development Inventory)
- (3) Language (Developmental Milestones Checklist II)
- (4) Extended Ages and Stages Questionnaire after 2 years of intervention
- (5) Language (100-word vocabulary checklist based on the MacArthur-Bates Communicative Development Inventory)

## Mental development (personal-social/socioemotional)

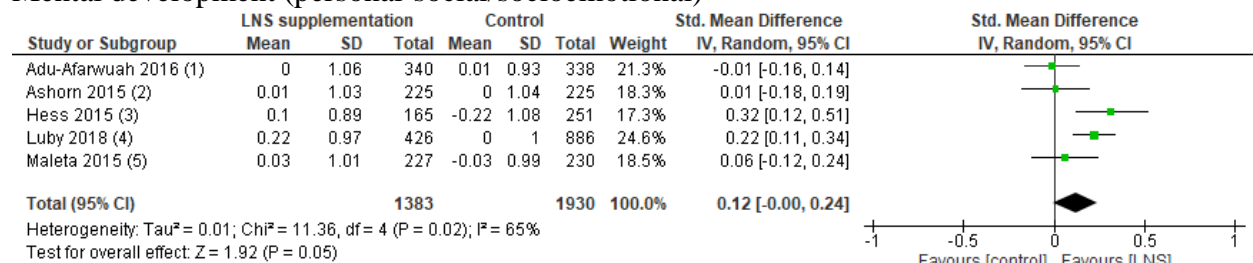

### Footnotes

- (1) Socioemotional (Profile of Social and Emotional Development)
- (2) Socioemotional (Profile of Social and Emotional Development)
- (3) Personal-social (Developmental Milestones Checklist II)
- (4) Extended Ages and Stages Questionnaire after 2 years of intervention
- (5) Socioemotional (Profile of Social and Emotional Development)

## Mental development (executive function)

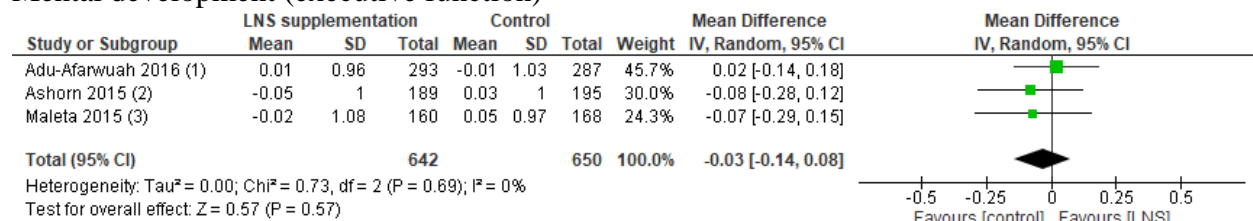

### Footnotes

- (1) A not B correct score
- (2) A not B correct score
- (3) A not B correct score

## Motor development

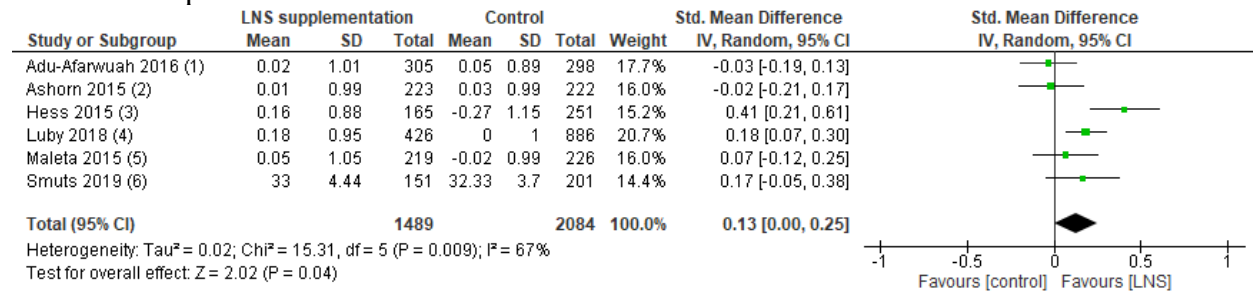

### Footnotes

- (1) Kilifi Developmental Inventory
- (2) Kilifi Developmental Inventory
- (3) Developmental Milestones Checklist II
- (4) Extended Ages and Stages Questionnaire after 2 years of intervention
- (5) Kilifi Developmental Inventory
- (6) South African Parent Rating

## Motor development (standing independently at 12 months of age)

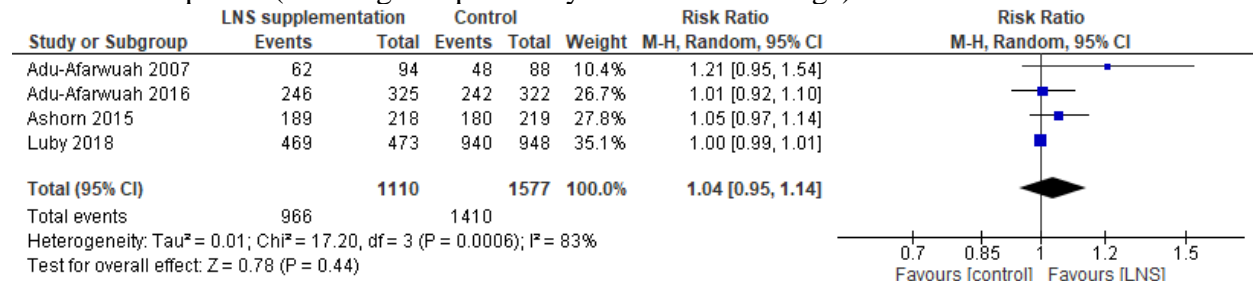

## Motor development (walking independently at 12 months of age)

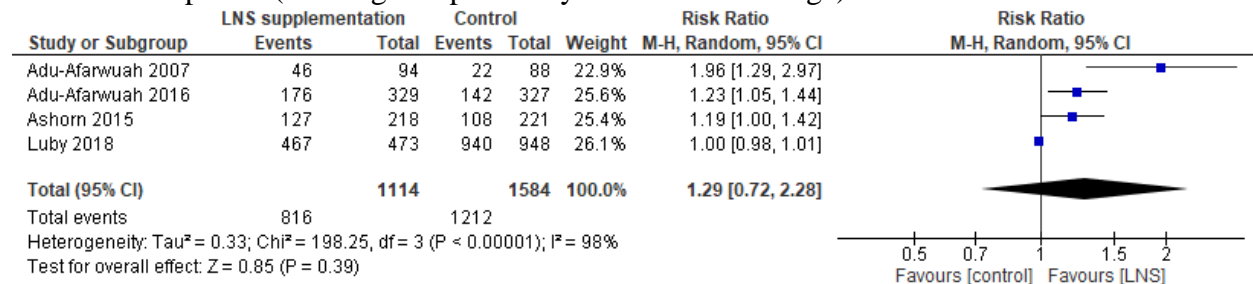



## Comparison 7: Subgroup Analyses for Lipid Nutrient Supplementation vs. Placebo/No Intervention (Efficacy)

### Anemia: WHO region

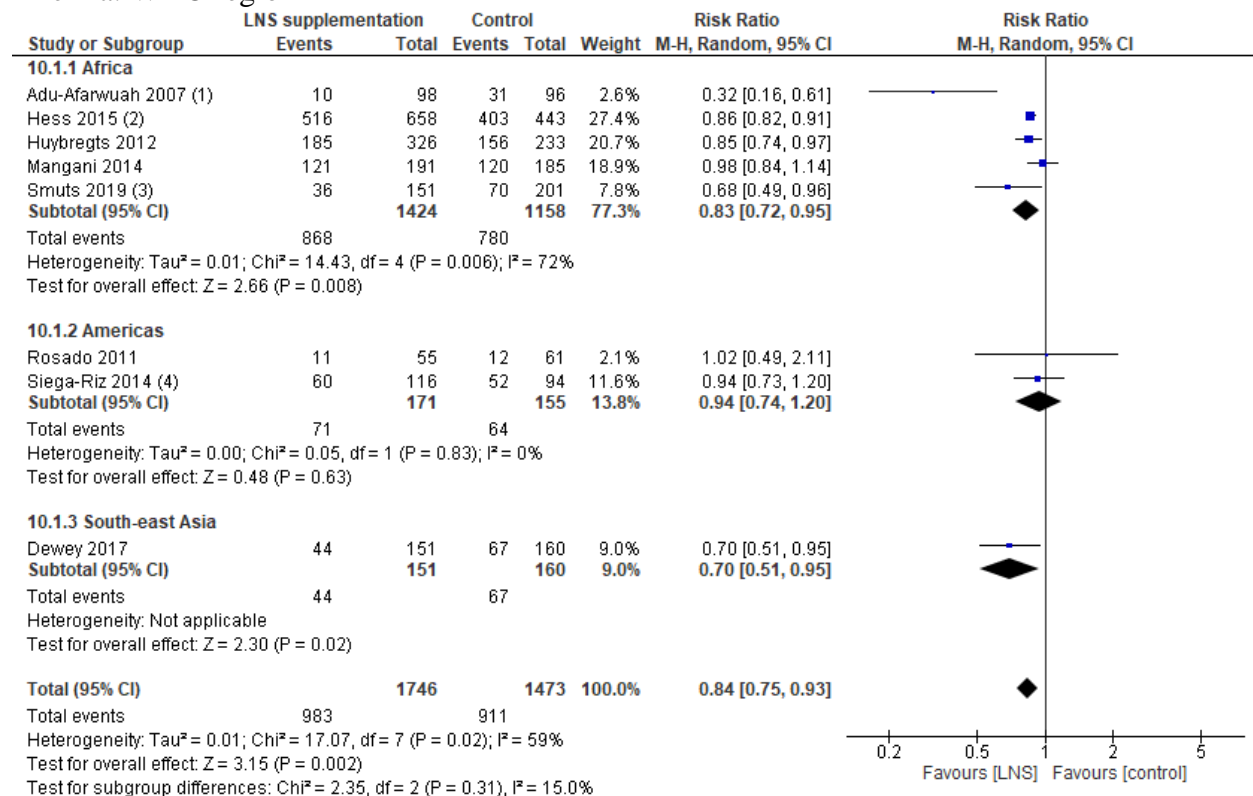

#### Footnotes

(1) Hemoglobin concentration <100g/L

(2) LNS (Zn 5mg) and LNS (Zn 10mg) groups were combined into one group

(3) SQ LNS group only

(4) Hemoglobin concentration <100 g/L for <12 month olds, <110 g/L for 12-24 month olds, and <111 g/l for 2-5 year olds

## Stunting: WHO region

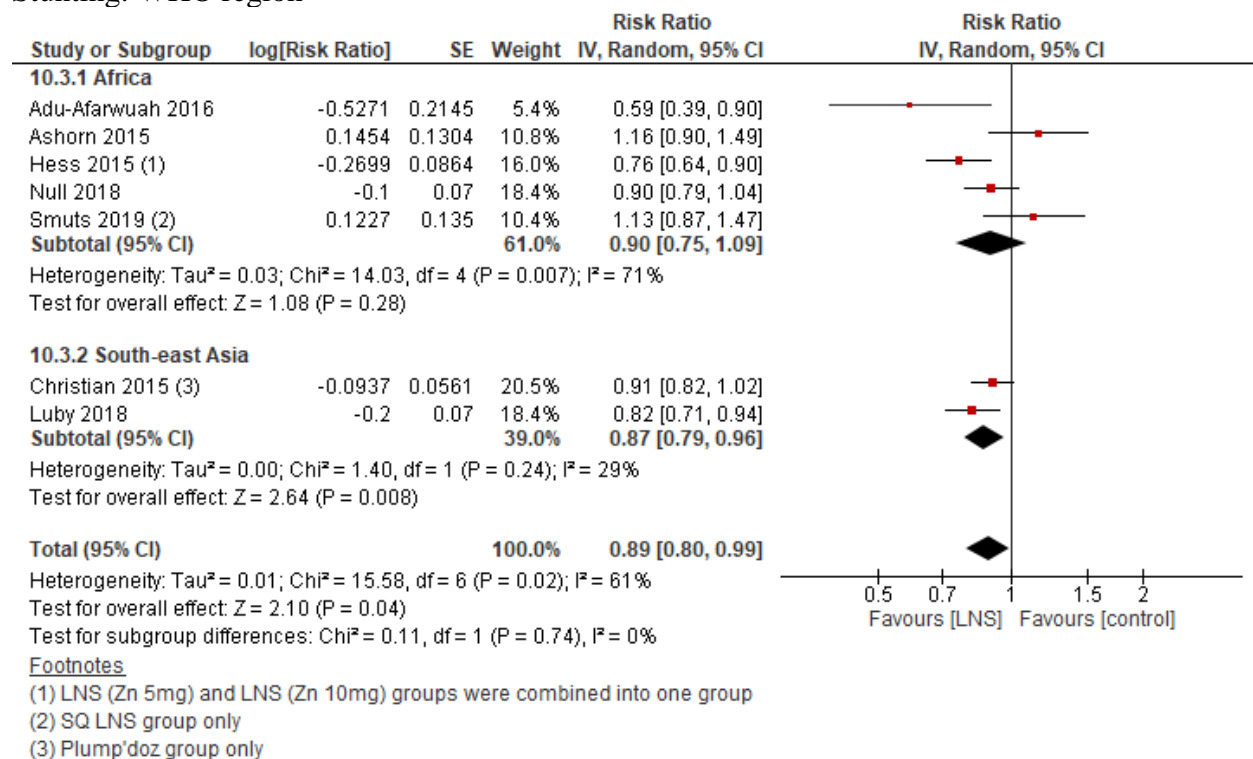

## Wasting: WHO region

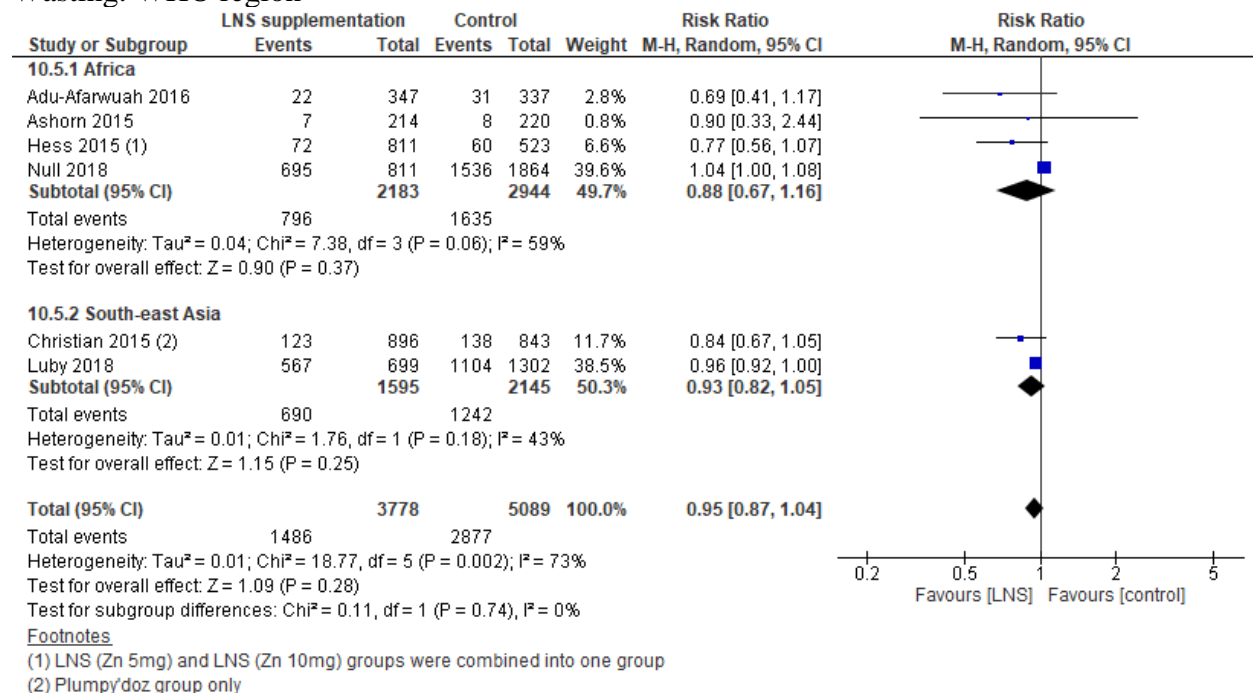

## Underweight: WHO region

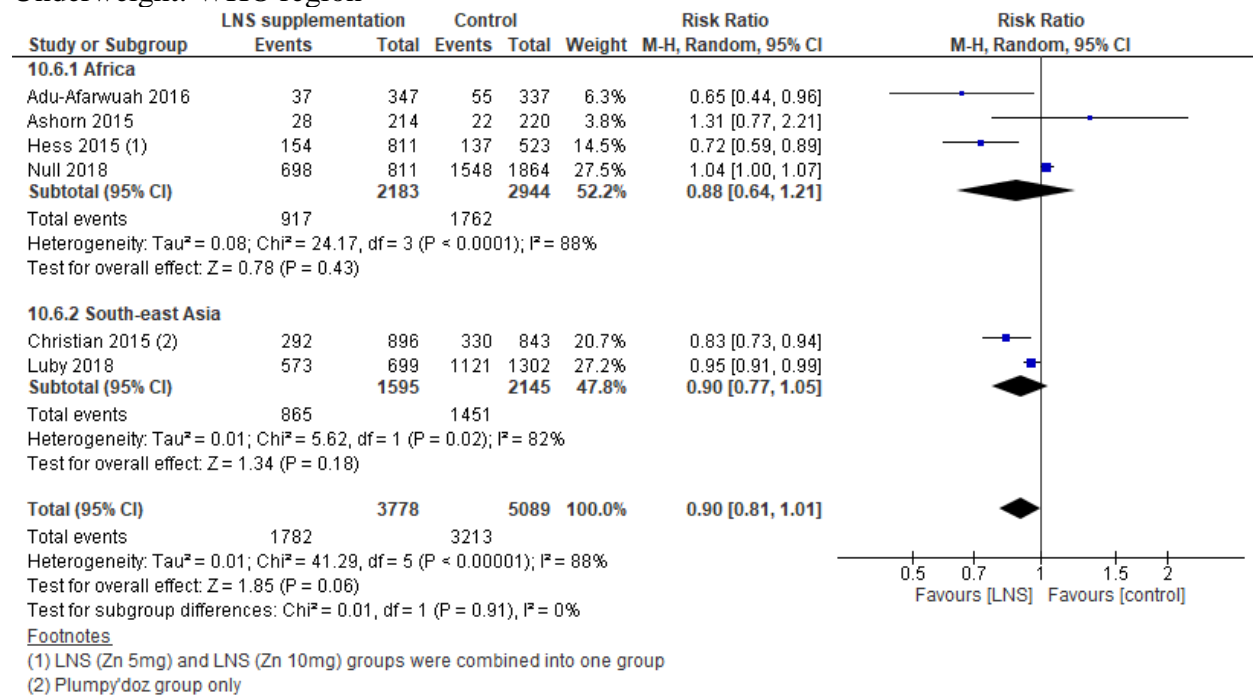

## Comparison 8: Targeted Fortification (with MMN) vs. Placebo/No Intervention (Efficacy)

### Height (cm)

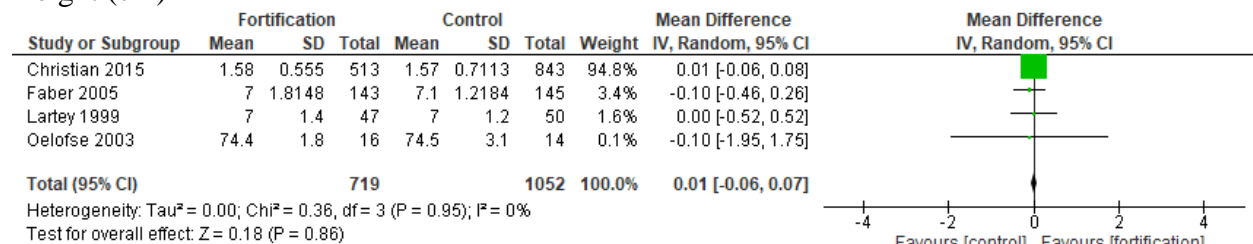

### Weight (kg)

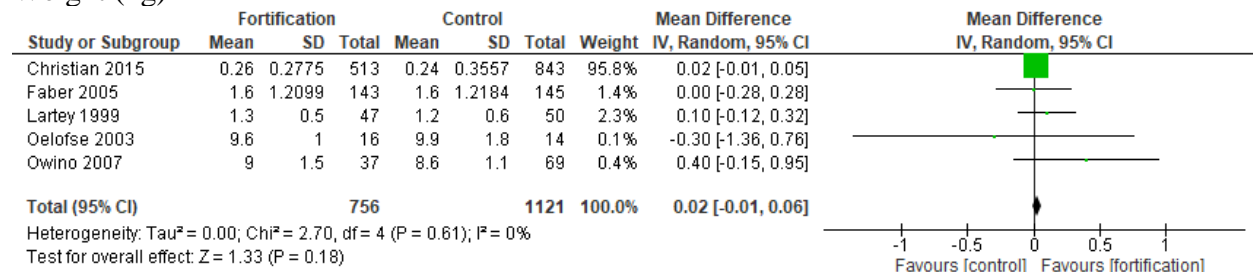

## Length-for-age (z-score)

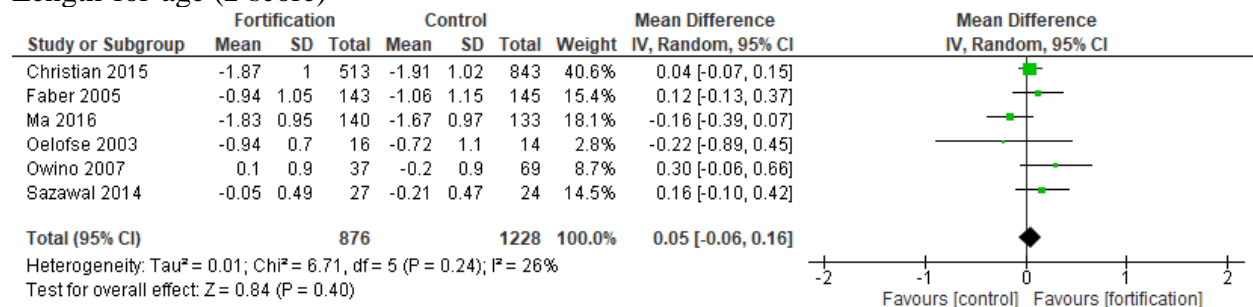

## Weight-for-age (z-score)

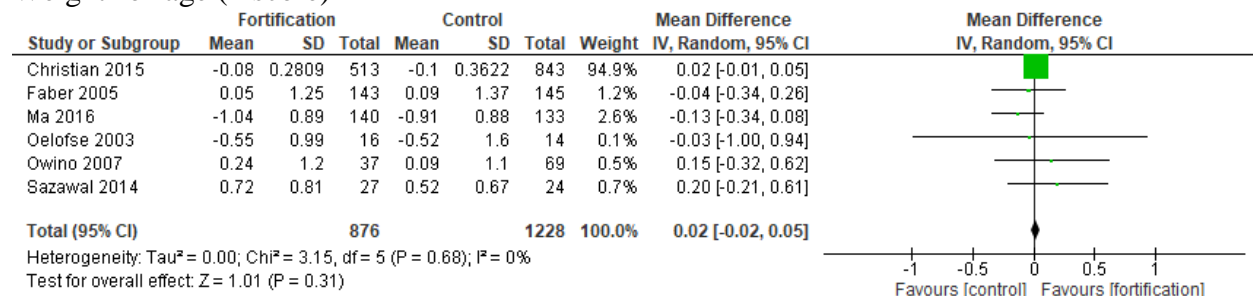

## Weight-for-height (z-score)

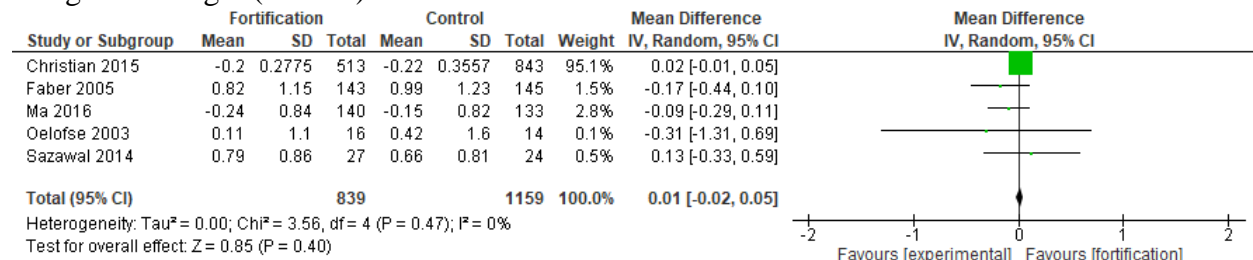

## Iron-deficiency anemia

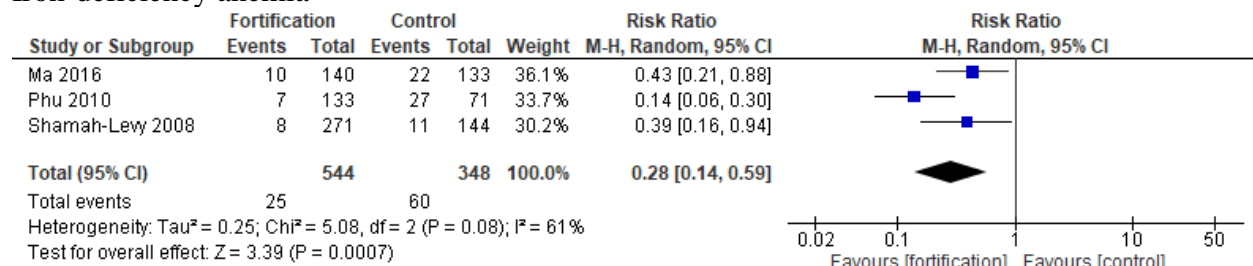

## Iron deficiency

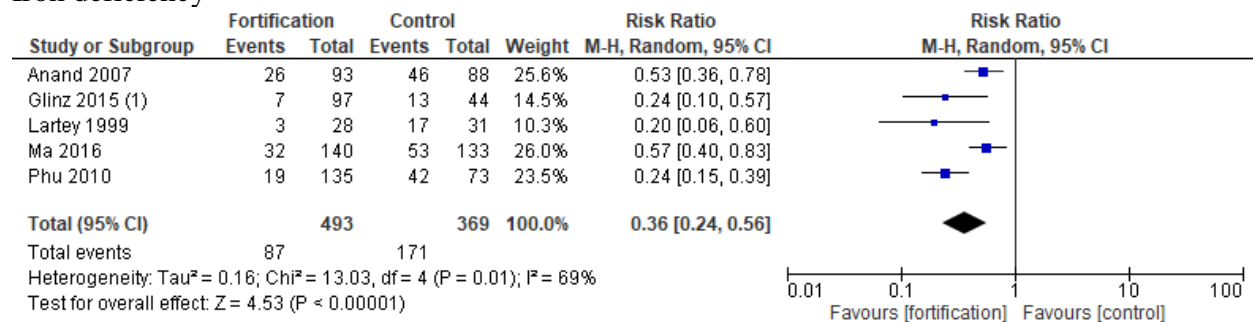

### Footnotes

(1) Fortified with iron only

## Hemoglobin (g/L)

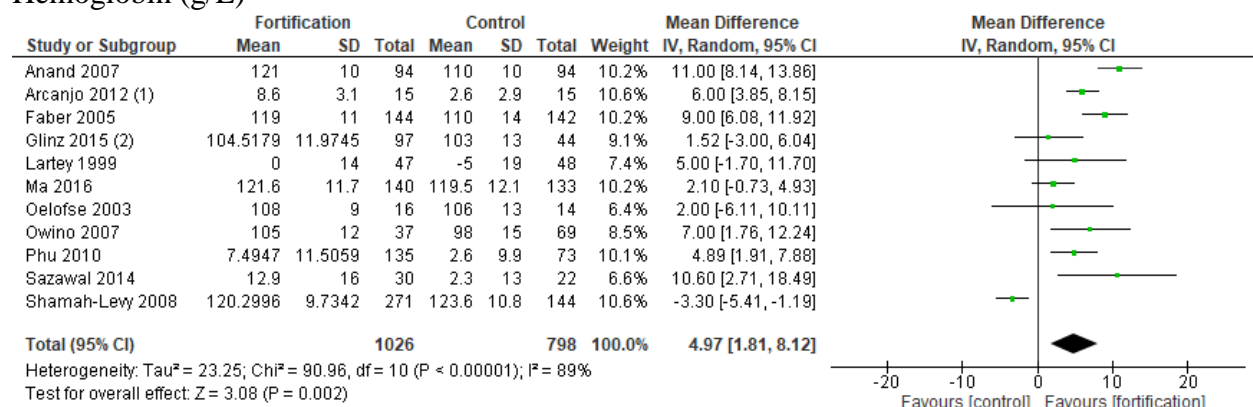

### Footnotes

(1) Fortified with iron only

(2) Fortified with iron only

## Serum/plasma ferritin (µg/L)

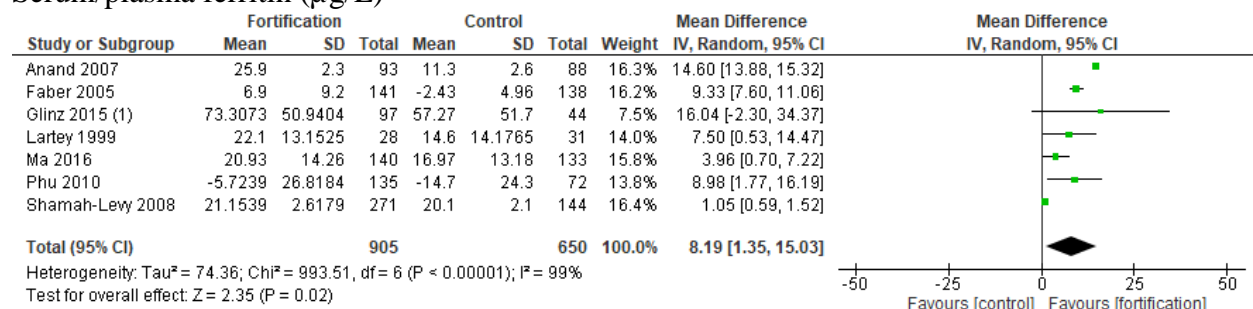

### Footnotes

(1) Fortified with iron only

## Serum/plasma retinol (µg/dL)

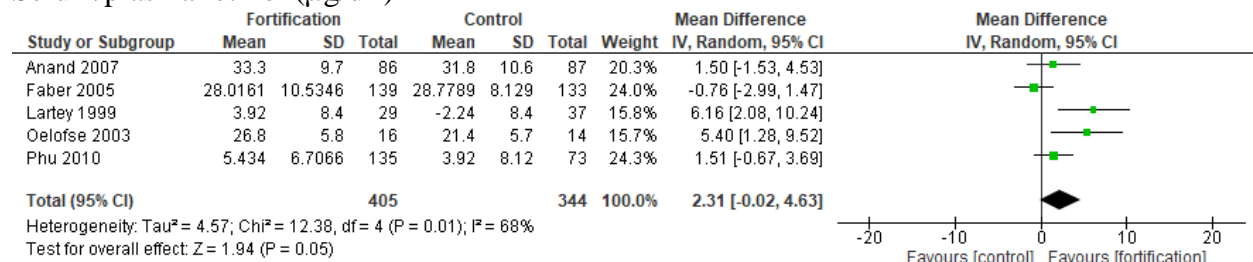

## Serum/plasma zinc (µg/dL)

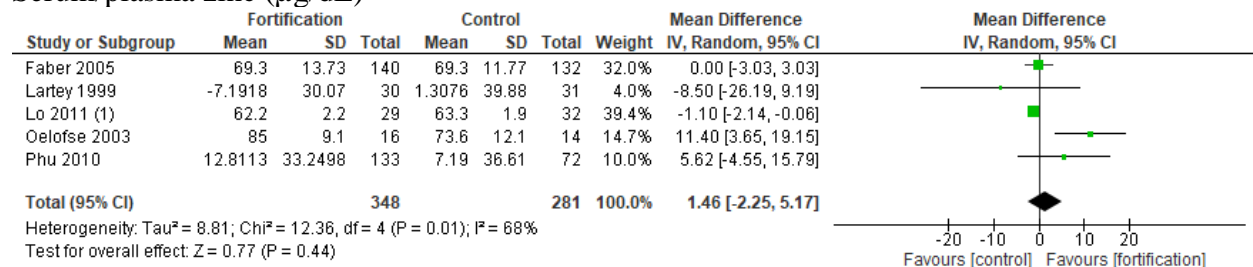

### Footnotes

(1) Fortified with zinc only

## Comparison 9a: Large-Scale Food Fortification (with MMN) vs. Placebo/No Intervention (Efficacy)

### Hemoglobin (g/dL)

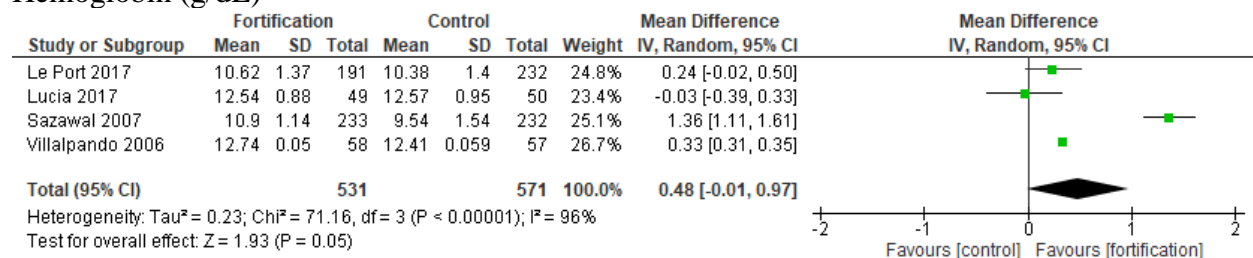

### Serum/plasma ferritin (µg/L)

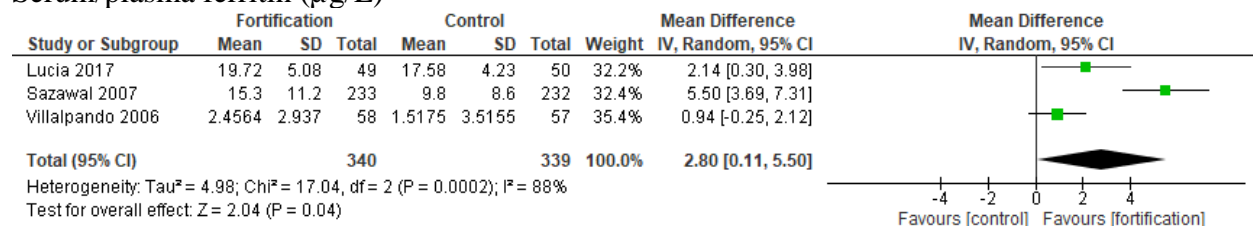

### Serum/plasma zinc (µg/dL)

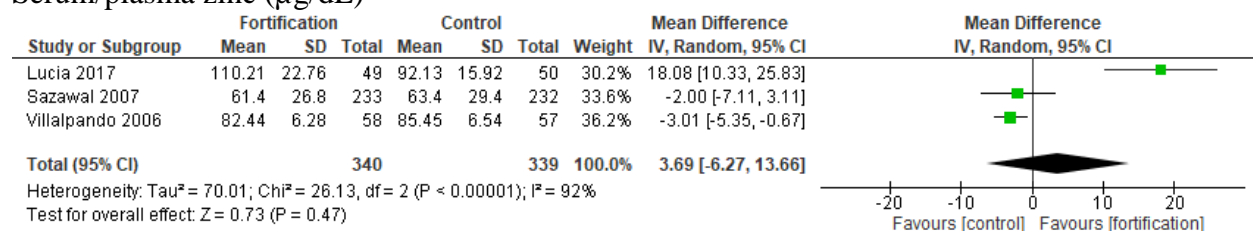

## Comparison 9b: Large-Scale Food fortification (with Iron) vs. Placebo/No Intervention (Efficacy)

### Hemoglobin (g/dL)

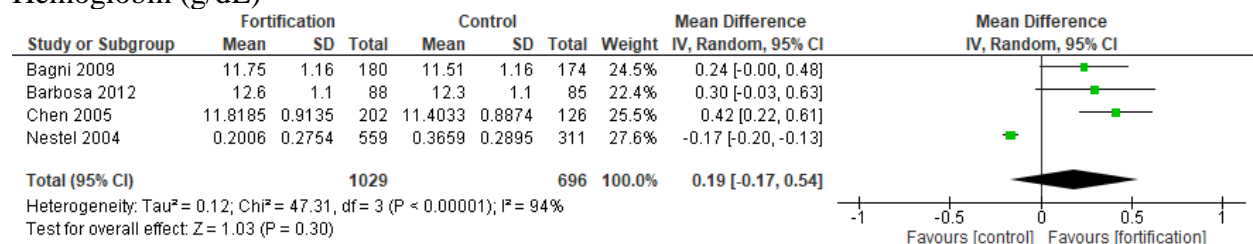

## **Comparison 10: Micronutrient Powder Supplementation vs. Placebo/No Intervention (Effectiveness)**

Hemoglobin (g/L)

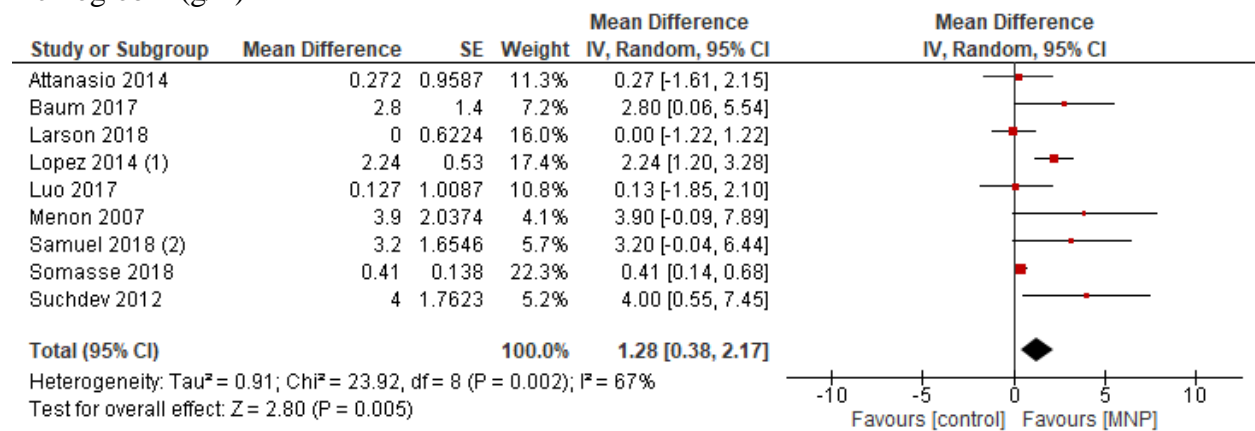

### Footnotes

(1) Controlled before-after study

(2) Quasi experimental matched control design

## Comparison 10: Subgroup Analyses for Micronutrient Powders vs. Placebo/No Intervention (Effectiveness)

Anemia: WHO region:

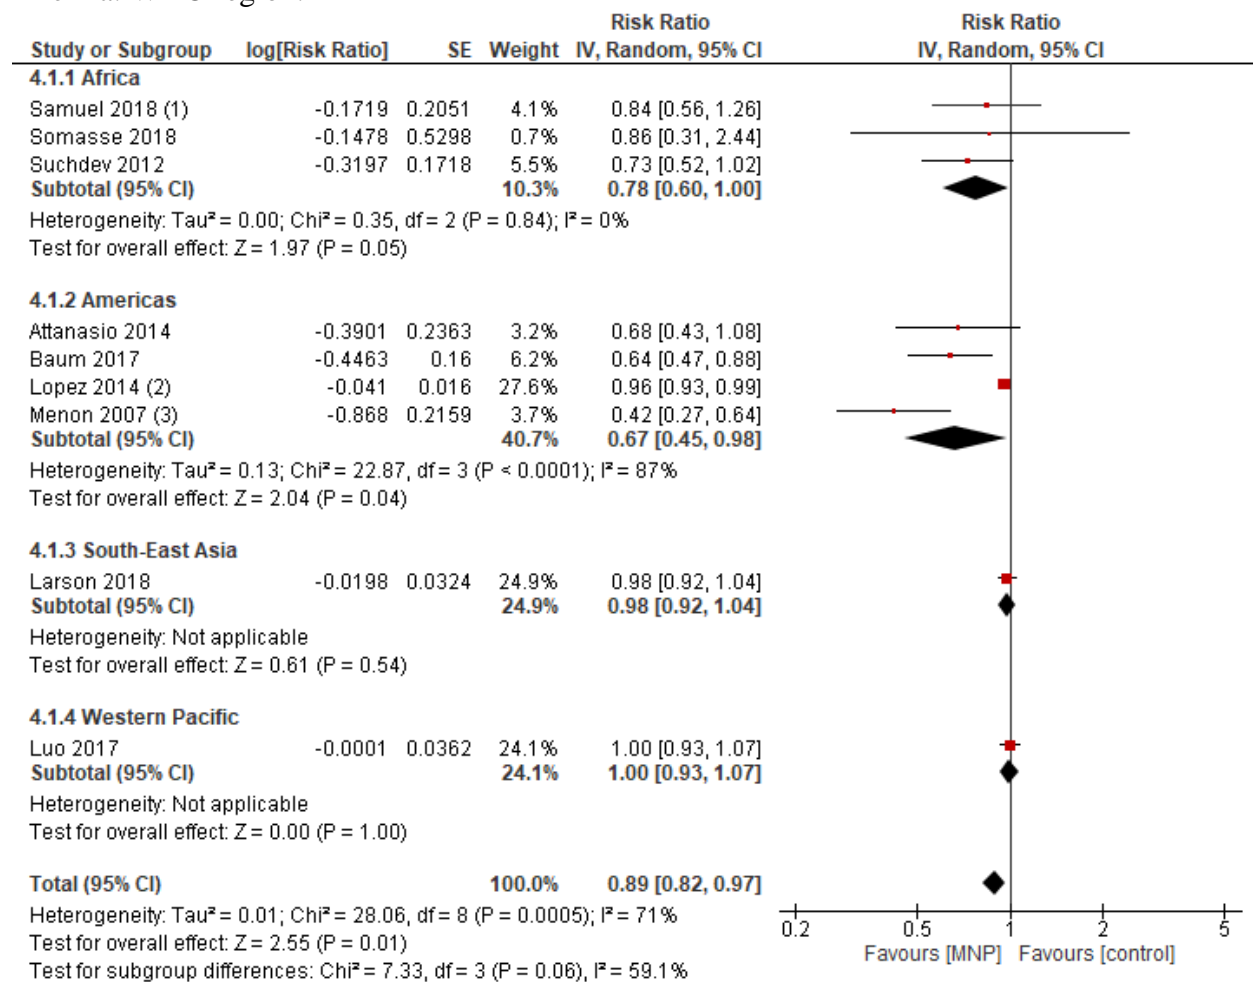

### Footnotes

(1) Quasi experimental matched control design

(2) Controlled before-after study

(3) Both groups received iron-fortified wheat-soy blend



## Anemia: intervention duration

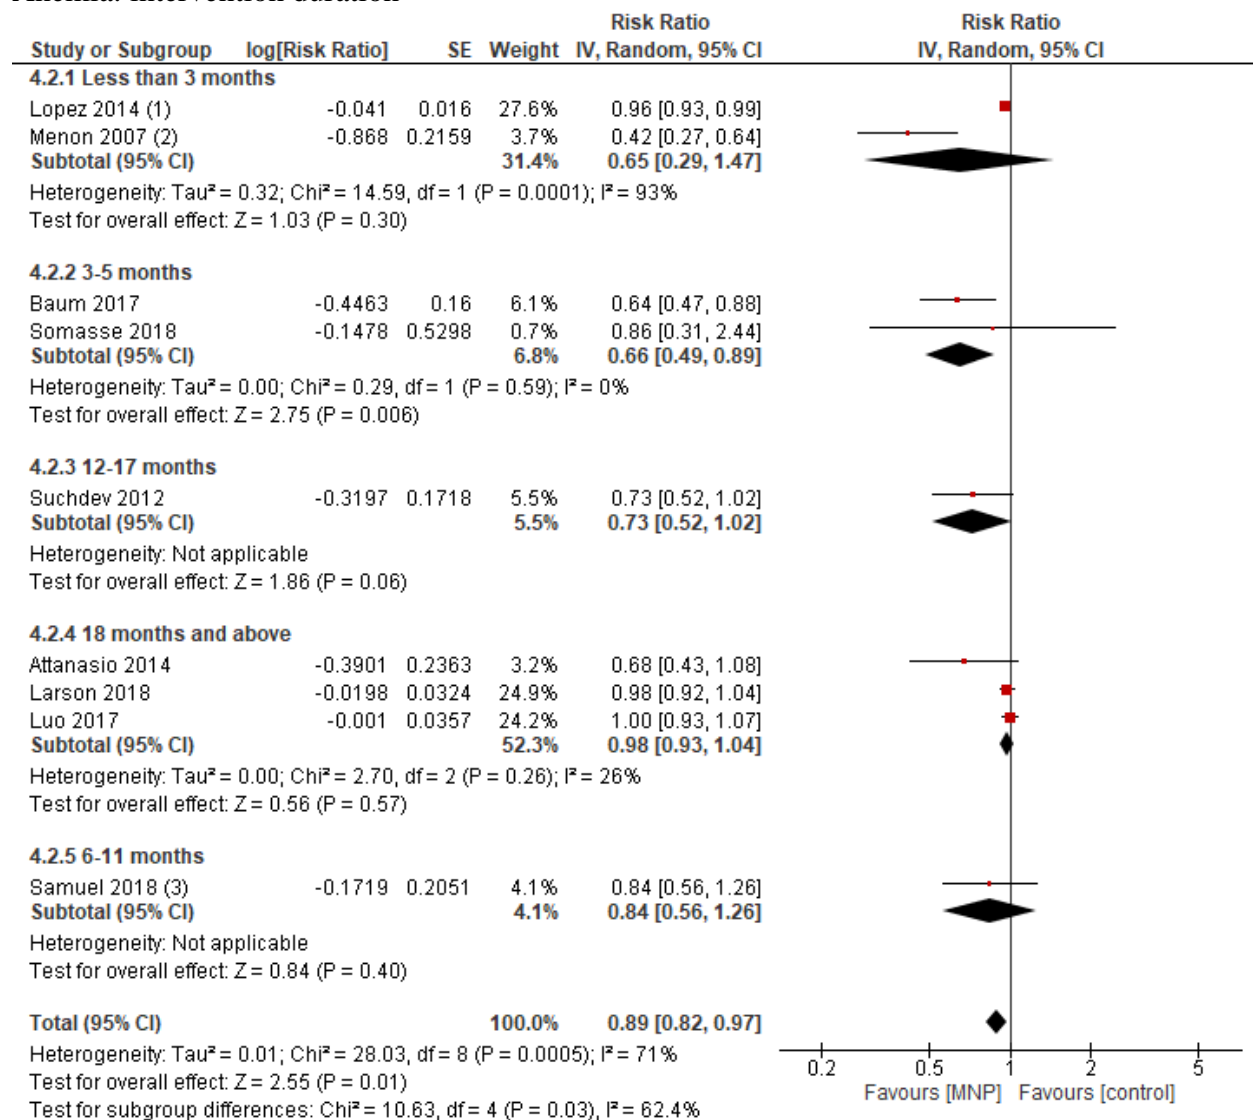

### Footnotes

(1) Controlled before-after study

(2) Both groups received iron-fortified wheat-soy blend

(3) Quasi experimental matched control design

## Anemia: nutritional status at baseline (anemic vs. non anemic)

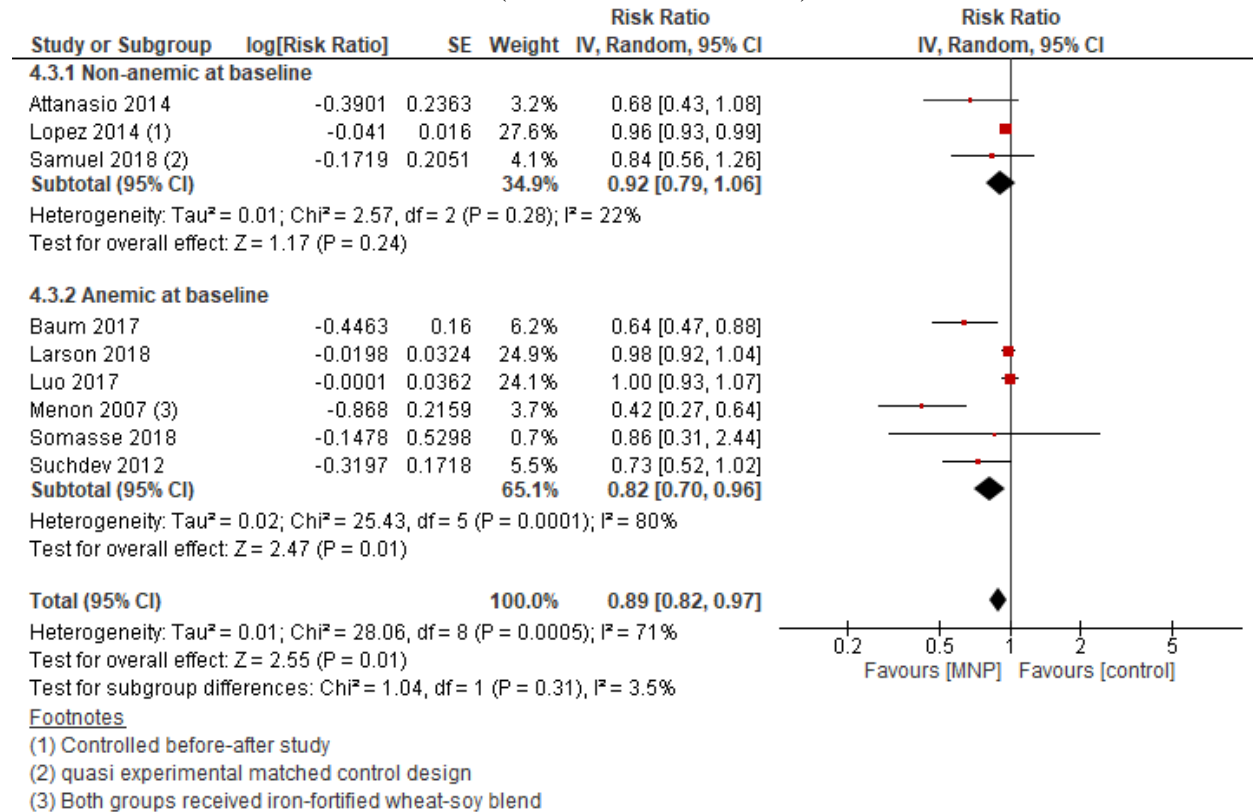

## Comparison 11: Lipid-based Nutrient Supplementation vs. Placebo/No Intervention (Effectiveness)

### Stunting

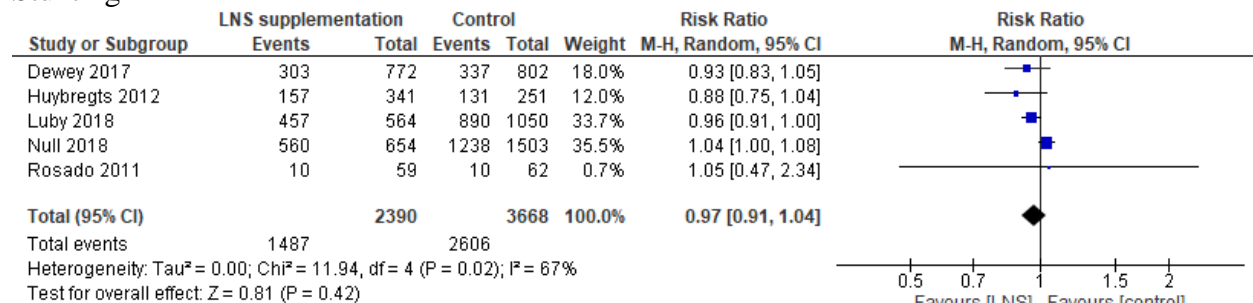

### Hemoglobin (g/L)

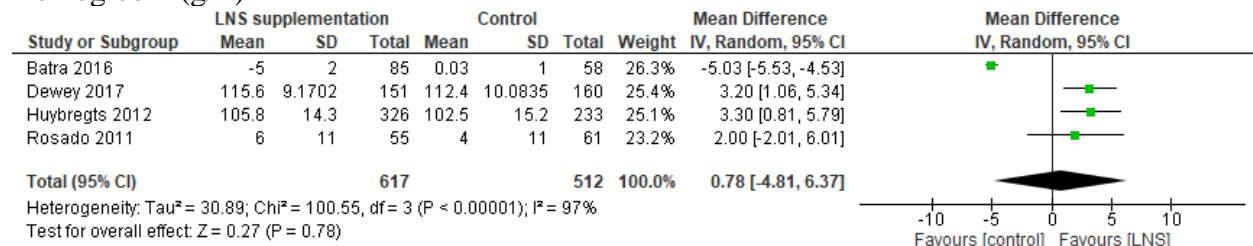

## Length-for-age (z-score)

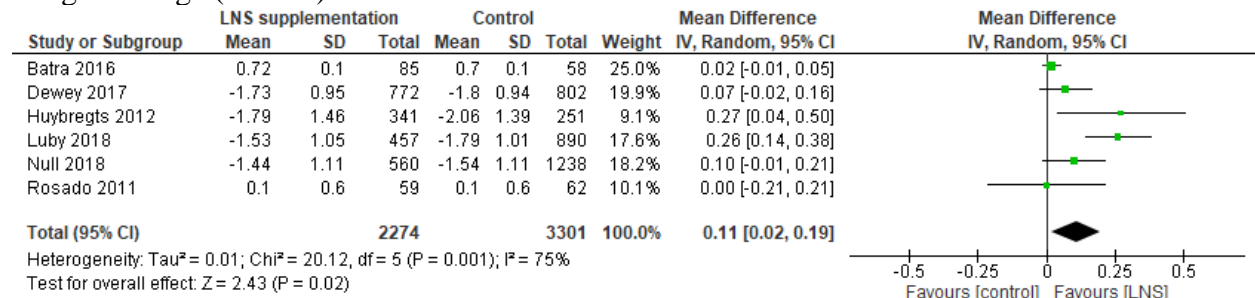

## Weight-for-age (z-score)

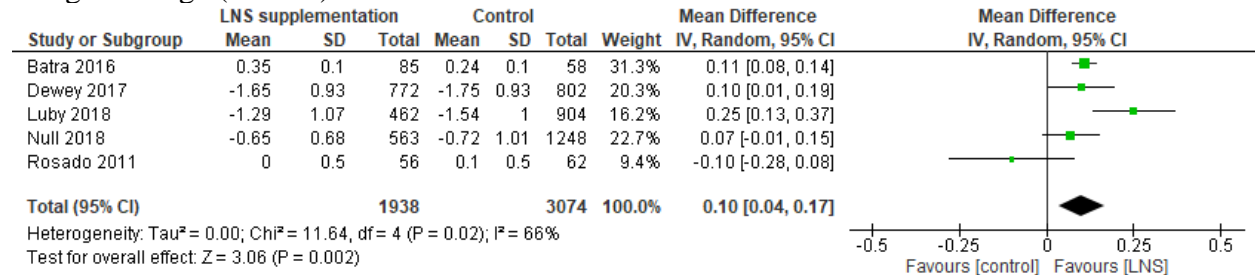

## Weight-for-height (z-score)

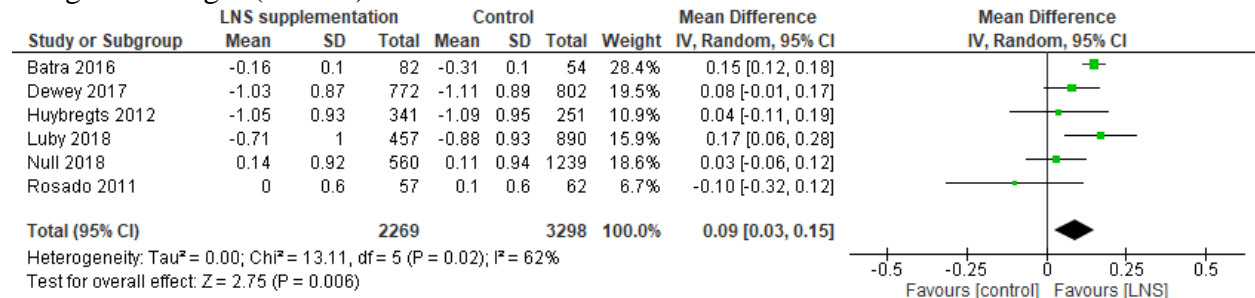

Supplement: s1 [file s1]
